# Supplementary material for: Correlation of Blood Biochemical Markers with Tardive Dyskinesia in Schizophrenic Patients
Source: Hindawi journal article supplement (doi:10.1155/2022/1767989), 2022-03-08
Supplement: f1 [file 1767989.f1.pdf]

|                 |                                                       |
|-----------------|-------------------------------------------------------|
| <b>name</b>     |                                                       |
| <b>group</b>    |                                                       |
| <b>gender</b>   |                                                       |
| <b>age</b>      |                                                       |
| <b>edu</b>      |                                                       |
| <b>marry</b>    |                                                       |
| <b>heredity</b> |                                                       |
| <b>diagtype</b> |                                                       |
| <b>sympage</b>  |                                                       |
| <b>hospage</b>  |                                                       |
| <b>tcourse</b>  |                                                       |
| <b>course</b>   |                                                       |
| <b>smoking</b>  |                                                       |
| <b>height</b>   |                                                       |
| <b>waist</b>    |                                                       |
| <b>hip</b>      |                                                       |
| <b>waisthip</b> |                                                       |
| <b>weight</b>   |                                                       |
| <b>bmi</b>      |                                                       |
| <b>p</b>        |                                                       |
| <b>n</b>        |                                                       |
| <b>g</b>        |                                                       |
| <b>panss</b>    |                                                       |
| <b>cgi</b>      |                                                       |
| <b>hamd</b>     |                                                       |
| <b>glu</b>      |                                                       |
| <b>glu2h</b>    |                                                       |
| <b>IGT</b>      | impaired glucose tolerance                            |
| <b>IFG</b>      | impaired fasting glucose                              |
| <b>insuli</b>   |                                                       |
| <b>IR</b>       |                                                       |
| <b>cho</b>      |                                                       |
| <b>tg</b>       |                                                       |
| <b>hdl</b>      |                                                       |
| <b>ldl</b>      |                                                       |
| <b>agegroup</b> |                                                       |
| <b>glub</b>     |                                                       |
| <b>glu2b</b>    |                                                       |
| <b>IFGb</b>     | impaired fasting glucose after treatment              |
| <b>IGTb</b>     | impaired glucose tolerance after treatment            |
| <b>pb</b>       | SumPAN7P positive subscale total score                |
| <b>nb</b>       | SumPAN7N negative subscale total score                |
| <b>gb</b>       | SumPAN7G General psychopathology subscale total score |
| <b>panssb</b>   | SumPANS7 PANSS total score                            |
| <b>hamdb</b>    | SumHAMD HAMD total score                              |
| <b>cgib</b>     | C7G11c Disease severity                               |
| <b>chob</b>     | CH07 Total cholesterol(mmol/L)                        |
| <b>tgb</b>      | TG7 Triglycerides(mmol/L)                             |
| <b>hdlb</b>     |                                                       |

|                                               |                                  |
|-----------------------------------------------|----------------------------------|
| <b>ldlb</b>                                   |                                  |
| <b>bmib</b>                                   |                                  |
| <b>waistb</b>                                 |                                  |
| <b>hipb</b>                                   |                                  |
| <b>weightb</b>                                |                                  |
| <b>insulib</b>                                |                                  |
| <b>IRb</b>                                    |                                  |
| <b>waisthipb</b>                              |                                  |
| <b>tmt</b>                                    | Connected fractions              |
| <b>SC</b>                                     | Symbolic coding scores           |
| <b>hvlit</b>                                  | Verbal memory score              |
| <b>ss</b>                                     | Spatial breadth score            |
| <b>ds</b>                                     | Number sequence score            |
| <b>nab</b>                                    | Maze score                       |
| <b>maze</b>                                   | Maze score                       |
| <b>bvmt</b>                                   | Visual Memory Score              |
| <b>cf</b>                                     | Verbal Fluency Score             |
| <b>eit</b>                                    | Emotional Management Score       |
| <b>cptd</b>                                   | Continuous Operations Test Score |
| <b>MCCB Total Score</b>                       |                                  |
| <b>stroop</b>                                 | Stroop Score                     |
| <b>ep</b>                                     | Emotional Recognition Score      |
| <b>dspan</b>                                  | Breadth of Numbers Score         |
| <b>upsa score</b>                             |                                  |
| <b>Linking T points</b>                       | TMT                              |
| <b>Symbolic coding T-score</b>                | SC                               |
| <b>Verbal memory T-score</b>                  | hvlit                            |
| <b>Spatial breadth T-score</b>                | SS                               |
| <b>Maze T-score</b>                           | maze (NAB)                       |
| <b>Visual Memory T Score</b>                  | bvmt                             |
| <b>Verbal Fluency T Score</b>                 | cf                               |
| <b>Emotion Management Ability T Score</b>     | eit                              |
| <b>Continuous operational ability T score</b> | cptd                             |
| <b>Digit Sequence T Score</b>                 | ds                               |
| <b>UPSA China Standing Model T Score</b>      |                                  |

al score

| name | group | gender | age | edu | marry | eredity | agtype | mpage | ospage | course |
|------|-------|--------|-----|-----|-------|---------|--------|-------|--------|--------|
| 季博文  | 1.00  | 1      | 16  | 9   | 1     | 1       | 21     | 16    | 16     | 2.00   |
| 李世强  | 1.00  | 1      | 16  | 9   | 1     | 2       | 21     | 15    | 16     | 10.00  |
| 张赛   | 1.00  | 1      | 16  | 8   | 1     | 2       | 20     | 15    | 16     | 5.00   |
| 班兆龙  | 1.00  | 1      | 17  | 8   | 1     | 2       | 21     | 16    | 16     | 1.00   |
| 代玲月  | 1.00  | 1      | 17  | 11  | 1     | 1       | 21     | 16    | 17     | 1.00   |
| 丁铄   | 1.00  | 1      | 17  | 10  | 1     | 1       | 21     | 17    | 17     | 3.30   |
| 贺建新  | 1.00  | 1      | 17  | 11  | 1     | 2       | 20     | 16    | 17     | 8.00   |
| 肖爽   | 1.00  | 1      | 17  | 11  | 1     | 1       | 20     | 17    | 17     | .10    |
| 鲍东   | 1.00  | 1      | 18  | 12  | 1     | 1       | 21     | 18    | 18     | 3.00   |
| 刘俊龙  | 1.00  | 1      | 18  | 12  | 1     | 1       | 20     | 18    | 18     | 4.00   |
| 尚乐   | 1.00  | 1      | 18  | 7   | 1     | 2       | 21     | 14    | 18     | 4.00   |
| 田贺   | 1.00  | 1      | 18  | 11  | 1     | 2       | 21     | 15    | 17     | 31.00  |
| 赵建琛  | 1.00  | 1      | 18  | 12  | 1     | 1       | 21     | 16    | 17     | 24.00  |
| 陈广广  | 1.00  | 1      | 19  | 9   | 1     | 2       | 21     | 17    | 18     | 24.00  |
| 勾浩同  | 1.00  | 1      | 19  | 10  | 1     | 2       | 21     | 19    | 19     | 2.00   |
| 郝羽曾  | 1.00  | 1      | 19  | 9   | 1     | 2       | 21     | 19    | 19     | 24.00  |
| 黄超   | 1.00  | 1      | 19  | 9   | 1     | 2       | 21     | 19    | 19     | .50    |
| 江苏明  | 1.00  | 1      | 19  | 9   | 1     | 2       | 20     | 18    | 19     | 12.00  |
| 蒋兆星  | 1.00  | 1      | 19  | 13  | 1     |         | 21     | 18    | 19     | 8.00   |
| 唐珂   | 1.00  | 1      | 19  | 10  | 1     | 2       | 21     | 17    | 17     | 27.00  |
| 王帅   | 1.00  | 1      | 19  | 12  | 1     | 2       | 20     | 18    | 19     | 21.00  |
| 许云凯  | 1.00  | 1      | 19  | 13  | 1     | 2       | 20     | 19    | 19     | 1.00   |
| 陈雨   | 1.00  | 1      | 20  | 13  | 1     | 2       | 20     | 17    | 20     | 36.00  |
| 刘南南  | 1.00  | 1      | 20  | 14  | 1     | 2       | 21     | 17    | 20     | 36.00  |
| 马崇旭  | 1.00  | 1      | 20  | 14  | 1     | 2       | 20     | 20    | 20     | 1.00   |
| 王叟   | 1.00  | 1      | 20  | 12  | 1     | 1       | 21     | 16    | 20     | 40.00  |
| 王尧尧  | 1.00  | 1      | 20  | 14  | 1     | 2       | 20     | 20    | 20     | 2.00   |
| 霍辰   | 1.00  | 1      | 21  | 15  | 1     | 2       | 21     | 17    | 20     | 4.00   |
| 姜波   | 1.00  | 1      | 21  | 11  | 1     | 1       | 21     | 16    | 18     | 60.00  |
| 李喜锋  | 1.00  | 1      | 21  | 12  | 1     | 2       | 21     | 18    | 19     | 36.00  |
| 唐正研  | 1.00  | 1      | 21  | 11  | 1     | 2       | 20     | 21    | 21     | .30    |
| 吴朝阳  | 1.00  | 1      | 21  | 15  | 1     | 2       | 21     | 21    | 21     | 4.00   |
| 李文广  | 2.00  | 1      | 21  | 9   |       |         |        |       |        |        |
| 刘宝珠  | 1.00  | 1      | 22  | 9   | 1     | 2       | 21     | 18    | 22     | 48.00  |
| 孙飞   | 1.00  | 1      | 22  | 14  | 1     | 2       | 20     | 20    | 22     | 21.00  |
| 杨杰   | 1.00  | 1      | 22  | 24  | 1     | 1       | 20     | 23    | 23     | 5.00   |
| 张科   | 1.00  | 1      | 22  | 18  | 1     | 2       | 21     | 22    | 22     | .10    |
| 孙志杨  | 2.00  | 1      | 22  | 15  |       |         |        |       |        |        |
| 廖清   | 1.00  | 1      | 23  | 16  | 1     | 2       | 21     | 20    | 23     | 37.00  |
| 刘焕振  | 1.00  | 1      | 23  | 11  | 1     | 2       | 21     | 16    | 16     | 72.00  |
| 王建波  | 1.00  | 1      | 23  | 12  | 1     | 2       | 21     | 23    | 23     | 26.00  |
| 王立斌  | 1.00  | 1      | 23  | 15  | 1     | 1       | 21     | 17    | 19     | 72.00  |
| 李友峰  | 1.00  | 1      | 24  | 9   | 1     | 2       | 20     | 21    | 24     | 36.00  |
| 姚金鑫  | 1.00  | 1      | 24  | 12  | 1     | 2       | 21     | 20    | 21     | 9.00   |
| 张亮   | 1.00  | 1      | 24  | 14  | 1     | 1       | 21     | 24    | 24     | 2.00   |

|     |      |   |    |    |   |   |    |    |    |       |
|-----|------|---|----|----|---|---|----|----|----|-------|
| 张栩文 | 1.00 | 1 | 24 | 15 | 1 | 1 | 20 | 24 | 24 | 6.00  |
| 谢景强 | 2.00 | 1 | 24 | 16 |   |   |    |    |    |       |
| 段彦勇 | 1.00 | 1 | 26 | 14 | 1 | 2 | 21 | 24 | 26 | 13.00 |
| 葛家祥 | 1.00 | 1 | 26 | 16 | 1 | 1 | 20 | 23 | 26 | 36.00 |
| 李国玉 | 1.00 | 1 | 26 | 9  | 1 | 2 | 20 | 24 | 26 | 28.00 |
| 王一平 | 1.00 | 1 | 26 | 12 | 1 | 2 | 20 | 24 | 26 | 26.00 |
| 阴琦山 | 1.00 | 1 | 26 | 12 | 1 | 2 | 21 | 24 | 26 | 24.00 |
| 左楠  | 1.00 | 1 | 27 | 15 | 1 | 2 | 21 | 27 | 27 | 10.00 |
| 焦艳凜 | 2.00 | 1 | 27 | 15 |   |   |    |    |    |       |
| 杨旭  | 2.00 | 1 | 27 | 16 |   |   |    |    |    |       |
| 来原  | 1.00 | 1 | 28 | 18 | 1 | 1 | 20 | 27 | 28 | 19.00 |
| 王建武 | 1.00 | 1 | 28 | 22 | 2 | 2 | 20 | 27 | 27 | 3.00  |
| 王林  | 1.00 | 1 | 28 | 16 | 1 | 1 | 20 | 25 | 25 | 36.00 |
| 王亚辉 | 1.00 | 1 | 28 | 9  | 2 | 2 | 20 | 25 | 25 | 36.00 |
| 蔡壮  | 2.00 | 1 | 28 | 16 |   |   |    |    |    |       |
| 韩瑞俊 | 2.00 | 1 | 28 | 16 |   |   |    |    |    |       |
| 马传领 | 1.00 | 1 | 29 | 9  | 2 | 2 | 20 | 29 | 29 | 1.00  |
| 孙克  | 2.00 | 1 | 29 | 15 |   |   |    |    |    |       |
| 赵冉  | 1.00 | 1 | 30 | 18 | 2 | 2 | 21 | 30 | 30 | 1.00  |
| 吕广有 | 2.00 | 1 | 30 | 16 |   |   |    |    |    |       |
| 孙文亮 | 1.00 | 1 | 31 | 18 | 1 | 1 | 20 | 30 | 30 | 6.00  |
| 申海龙 | 1.00 | 1 | 32 | 12 | 3 | 2 | 20 | 32 | 32 | .30   |
| 俞凯  | 1.00 | 1 | 32 | 16 | 1 | 2 | 20 |    | 32 |       |
| 赵政普 | 1.00 | 1 | 32 | 11 | 2 | 1 | 20 | 30 | 33 | 33.00 |
| 朱海红 | 1.00 | 1 | 32 | 9  | 2 | 2 | 20 | 32 | 32 | 1.00  |
| 杨玉涛 | 1.00 | 1 | 33 | 12 | 1 | 1 | 20 | 28 | 33 | 60.00 |
| 张洪泉 | 1.00 | 1 | 33 | 12 | 2 | 2 | 21 | 31 | 33 | 24.00 |
| 赵继江 | 1.00 | 1 | 33 | 19 | 1 | 2 | 21 | 29 | 29 | 39.00 |
| 门振东 | 2.00 | 1 | 33 | 15 |   |   |    |    |    |       |
| 周艳青 | 1.00 | 1 | 34 | 12 | 1 | 1 | 21 | 30 | 34 | 48.00 |
| 陈溯鹏 | 1.00 | 1 | 36 | 16 | 1 | 2 | 21 | 35 | 36 | 8.00  |
| 马勇  | 1.00 | 1 | 36 | 9  | 1 | 1 | 20 | 36 | 36 | 4.00  |
| 毛琰  | 1.00 | 1 | 36 | 17 | 2 | 2 | 33 | 34 | 34 | 24.00 |
| 吴长林 | 1.00 | 1 | 36 | 16 | 2 | 2 | 21 | 35 | 36 | 13.00 |
| 管楚明 | 1.00 | 1 | 37 | 3  | 1 | 2 | 20 | 33 | 37 | 41.00 |
| 张效禄 | 1.00 | 1 | 37 | 3  | 2 | 2 | 21 | 31 | 31 | 60.00 |
| 马玉山 | 1.00 | 1 | 38 | 12 | 1 | 2 | 20 | 38 | 38 | 1.00  |
| 王涛  | 1.00 | 1 | 38 | 16 | 2 | 2 | 20 | 35 | 36 | 30.00 |
| 褚志强 | 1.00 | 1 | 39 | 9  | 1 | 2 | 21 | 36 | 39 | 36.00 |
| 郝杰中 | 1.00 | 1 | 39 | 16 | 2 | 2 | 20 | 34 | 39 | 60.00 |
| 韩勇  | 2.00 | 1 | 39 | 15 |   |   |    |    |    |       |
| 周立巍 | 1.00 | 1 | 40 | 16 | 2 | 1 | 21 | 40 | 40 | 5.00  |
| 朱红  | 1.00 | 1 | 40 | 16 | 2 | 2 | 20 | 40 | 40 | 3.00  |
| 曹文胜 | 2.00 | 1 | 40 | 19 |   |   |    |    |    |       |
| 范林  | 1.00 | 1 | 43 | 12 | 3 | 2 | 20 | 41 | 43 | 30.00 |

|     |      |   |    |    |   |   |    |    |    |        |
|-----|------|---|----|----|---|---|----|----|----|--------|
| 谢杰  | 1.00 | 1 | 43 | 17 | 2 | 2 | 20 | 42 | 42 | 2.00   |
| 陈海平 | 1.00 | 1 | 47 | 15 | 1 | 2 | 21 | 42 | 40 | 24.00  |
| 刘洪云 | 1.00 | 1 | 47 | 12 | 2 | 1 | 20 | 24 | 47 | 288.00 |
| 孟连科 | 1.00 | 1 | 52 | 15 | 2 | 1 | 21 | 52 | 52 | 1.00   |
| 王立力 | 1.00 | 1 | 54 | 6  | 2 | 1 | 20 | 52 | 54 | 25.00  |
| 马莉  | 1.00 | 2 | 14 | 9  | 1 | 2 | 20 | 14 | 14 | 1.00   |
| 雷荔  | 1.00 | 2 | 15 | 9  | 1 | 1 | 20 | 12 | 15 | 40.00  |
| 李佳富 | 1.00 | 2 | 16 | 10 | 1 | 2 | 20 | 16 | 16 | 1.00   |
| 李响  | 1.00 | 2 | 16 | 9  | 1 | 2 | 21 | 15 | 16 | 12.00  |
| 赵自辉 | 1.00 | 2 | 16 | 10 | 1 | 2 | 21 | 16 | 16 | 6.00   |
| 卢君  | 1.00 | 2 | 18 | 12 | 1 | 1 | 21 | 18 | 18 | .25    |
| 秦雪  | 2.00 | 2 | 18 | 9  |   |   |    |    |    |        |
| 李正文 | 1.00 | 2 | 19 | 9  | 1 | 2 | 20 | 17 | 19 | 24.00  |
| 谢晓霞 | 1.00 | 2 | 19 | 12 | 1 | 2 | 20 | 18 | 19 | 6.00   |
| 张璠  | 1.00 | 2 | 19 | 16 | 1 | 1 | 21 | 19 | 19 | 2.00   |
| 刘蒙蒙 | 1.00 | 2 | 20 | 6  | 1 | 1 | 21 | 16 | 17 | 36.00  |
| 杨卓越 | 1.00 | 2 | 20 | 13 | 1 | 1 | 20 | 18 | 20 | 24.00  |
| 张静  | 1.00 | 2 | 20 | 8  | 1 | 2 | 21 | 18 | 20 | 19.00  |
| 曹晓  | 2.00 | 2 | 20 | 9  |   |   |    |    |    |        |
| 冯硕  | 1.00 | 2 | 21 | 15 | 1 | 1 | 21 | 21 | 21 | 3.00   |
| 李菲菲 | 1.00 | 2 | 21 | 9  | 1 | 2 | 21 | 19 | 19 | 29.00  |
| 龙霞  | 1.00 | 2 | 21 | 9  | 1 | 2 | 20 | 14 | 16 | 30.00  |
| 赵洁  | 1.00 | 2 | 21 | 9  | 1 | 2 | 21 | 17 | 21 | 48.00  |
| 赵云轩 | 1.00 | 2 | 21 | 15 | 1 | 1 | 20 | 18 | 21 | 24.00  |
| 王倩  | 2.00 | 2 | 21 | 15 |   |   |    |    |    |        |
| 黄喆寅 | 1.00 | 2 | 22 | 12 | 1 | 2 | 20 | 21 | 22 | 15.00  |
| 刘海云 | 1.00 | 2 | 22 | 12 | 1 | 2 | 21 | 19 | 20 | 38.00  |
| 刘兴华 | 1.00 | 2 | 22 | 8  | 2 | 2 | 20 | 19 | 22 | 36.00  |
| 陶涛  | 2.00 | 2 | 22 | 12 |   |   |    |    |    |        |
| 闫昊  | 2.00 | 2 | 22 | 12 |   |   |    |    |    |        |
| 张宏  | 2.00 | 2 | 22 | 12 |   |   |    |    |    |        |
| 张艳秋 | 2.00 | 2 | 22 | 12 |   |   |    |    |    |        |
| 白雪  | 1.00 | 2 | 23 | 16 | 1 | 2 | 21 | 16 | 22 | 84.00  |
| 陈小丽 | 1.00 | 2 | 23 | 91 | 0 | 1 | 21 | 23 | 23 | 5.00   |
| 刘娜  | 1.00 | 2 | 23 | 9  | 1 | 1 | 20 | 23 | 23 | 1.00   |
| 吕琼  | 1.00 | 2 | 23 | 9  | 1 | 2 | 21 | 23 | 23 | 3.00   |
| 孟佳玉 | 1.00 | 2 | 23 | 16 | 1 | 2 | 20 | 21 | 21 | 21.00  |
| 李艳妃 | 2.00 | 2 | 23 | 9  |   |   |    |    |    |        |
| 刘东方 | 2.00 | 2 | 23 | 16 |   |   |    |    |    |        |
| 曹顺晰 | 1.00 | 2 | 24 | 18 | 1 | 2 | 21 | 24 | 24 | 3.00   |
| 黄欣娟 | 1.00 | 2 | 24 | 19 | 2 | 2 | 21 | 24 | 24 | .83    |
| 李素红 | 1.00 | 2 | 24 | 15 | 1 | 2 | 20 | 24 | 24 | 3.00   |
| 刘海波 | 2.00 | 2 | 24 | 19 |   |   |    |    |    |        |
| 林坤  | 1.00 | 2 | 25 | 9  | 1 | 2 | 20 | 24 | 25 | 3.00   |
| 王菲  | 1.00 | 2 | 25 | 16 | 1 | 1 | 20 | 23 | 25 | 21.00  |

|     |      |   |    |    |   |   |    |    |    |       |
|-----|------|---|----|----|---|---|----|----|----|-------|
| 吴冬梅 | 1.00 | 2 | 25 | 15 | 1 | 2 | 21 | 25 | 25 | .50   |
| 张璇  | 1.00 | 2 | 25 | 16 | 1 | 2 | 21 | 25 | 25 | 1.00  |
| 肖艳霞 | 2.00 | 2 | 25 | 16 |   |   |    |    |    |       |
| 刘琳  | 1.00 | 2 | 26 | 16 | 1 | 1 | 20 | 21 | 26 | 60.00 |
| 郭威  | 1.00 | 2 | 27 | 16 | 1 | 1 | 21 | 26 | 26 | 18.00 |
| 李静  | 1.00 | 2 | 27 | 16 | 1 | 2 | 21 | 27 | 27 | 1.00  |
| 李思宁 | 1.00 | 2 | 27 | 16 | 1 | 2 | 20 | 23 | 26 | 36.00 |
| 刘海霞 | 1.00 | 2 | 27 | 9  | 1 | 2 | 20 | 18 | 18 | 9.00  |
| 齐月娥 | 1.00 | 2 | 27 | 16 | 1 | 2 | 20 | 27 | 27 | .10   |
| 任翠娥 | 1.00 | 2 | 27 | 8  | 1 | 2 | 21 | 25 | 25 | 31.00 |
| 宋媛  | 1.00 | 2 | 27 | 15 | 1 | 1 | 20 | 22 | 27 | 60.00 |
| 向春来 | 1.00 | 2 | 27 | 12 | 2 | 2 | 21 | 27 | 27 | .17   |
| 伊雪  | 1.00 | 2 | 27 | 15 | 1 | 2 | 21 | 23 | 24 | 48.00 |
| 李红娟 | 2.00 | 2 | 27 | 19 |   |   |    |    |    |       |
| 王璇  | 2.00 | 2 | 27 | 19 |   |   |    |    |    |       |
| 韩敬瑞 | 1.00 | 2 | 28 | 15 | 1 | 1 | 20 | 26 | 28 | 23.00 |
| 于乐  | 1.00 | 2 | 28 | 16 | 1 | 1 | 20 | 19 | 22 | 42.00 |
| 曹珍艳 | 1.00 | 2 | 29 | 19 | 2 | 1 | 21 | 28 | 29 | 4.00  |
| 郭穆  | 1.00 | 2 | 29 | 15 | 1 | 2 | 21 | 28 | 28 | 17.00 |
| 刘畅  | 1.00 | 2 | 29 | 16 | 3 | 2 | 20 | 28 | 29 | 12.00 |
| 王梦娜 | 1.00 | 2 | 29 | 12 | 2 | 2 | 20 | 29 | 29 | 2.00  |
| 张茜  | 1.00 | 2 | 29 | 19 | 1 | 2 | 20 | 27 | 29 | 19.00 |
| 姜雯  | 1.00 | 2 | 30 | 12 | 1 | 1 | 21 | 26 | 30 | 48.00 |
| 相冰娜 | 1.00 | 2 | 30 | 12 | 3 | 2 | 21 | 28 | 30 | 24.00 |
| 易莉  | 1.00 | 2 | 30 | 9  | 1 | 2 | 20 | 29 | 30 | 8.00  |
| 袁华  | 1.00 | 2 | 30 | 9  | 2 | 2 | 20 | 29 | 30 | 17.00 |
| 吴秀京 | 1.00 | 2 | 31 | 9  | 2 | 2 | 21 | 31 | 34 | 42.00 |
| 杨辉  | 1.00 | 2 | 31 | 16 | 3 | 1 | 20 | 28 | 31 | 36.00 |
| 王雪征 | 1.00 | 2 | 32 | 16 | 1 | 2 | 20 | 31 | 32 | 9.00  |
| 曾利红 | 1.00 | 2 | 32 | 12 | 2 | 2 | 20 | 25 | 32 | 83.00 |
| 窦凌云 | 1.00 | 2 | 33 | 15 | 2 | 1 | 20 | 29 | 30 | 48.00 |
| 于东海 | 1.00 | 2 | 33 | 12 | 2 | 2 | 20 | 33 | 33 | 6.00  |
| 才宏  | 1.00 | 2 | 34 | 8  | 2 | 2 | 20 | 29 | 29 | 59.00 |
| 陈亚萍 | 1.00 | 2 | 34 | 8  | 2 | 2 | 21 | 32 | 32 | 25.00 |
| 韩璐  | 1.00 | 2 | 34 | 16 | 1 | 2 | 20 | 30 | 34 | 48.00 |
| 徐坦赛 | 1.00 | 2 | 34 | 9  | 2 | 1 | 20 | 29 | 30 | 60.00 |
| 杨亚荣 | 1.00 | 2 | 34 | 12 | 2 | 2 | 20 | 33 | 33 | 16.00 |
| 陈俊英 | 1.00 | 2 | 35 | 13 | 1 | 2 | 21 | 35 | 35 | 6.00  |
| 周启芝 | 1.00 | 2 | 36 | 9  | 2 | 2 | 20 | 36 | 36 | 2.00  |
| 雷红杰 | 1.00 | 2 | 37 | 12 | 2 | 2 | 20 | 34 | 37 | 32.00 |
| 付昕  | 1.00 | 2 | 38 | 15 | 4 | 2 | 20 | 34 | 34 | 48.00 |
| 蒋雪芹 | 1.00 | 2 | 39 | 12 | 1 |   |    |    |    |       |
| 孙秀云 | 1.00 | 2 | 40 | 6  | 1 | 2 | 21 | 39 | 40 | 13.00 |
| 杨婉玲 | 1.00 | 2 | 40 | 15 | 2 | 2 | 21 | 38 | 39 | 30.00 |
| 范彩云 | 1.00 | 2 | 41 | 2  | 2 | 2 | 21 | 41 | 41 | .40   |

|     |      |   |    |    |   |   |    |    |    |       |
|-----|------|---|----|----|---|---|----|----|----|-------|
| 李燕  | 1.00 | 2 | 41 | 12 | 2 | 2 | 20 | 41 | 41 | 1.00  |
| 盛蕾  | 1.00 | 2 | 41 | 15 | 2 | 2 | 21 | 41 | 41 | .20   |
| 吴立新 | 1.00 | 2 | 41 | 15 | 2 | 1 | 21 | 39 | 48 | 24.00 |
| 国玉玲 | 1.00 | 2 | 42 | 9  | 2 | 2 | 20 | 42 | 42 | 30.00 |
| 王翠明 | 1.00 | 2 | 43 | 16 | 2 | 1 | 21 | 42 | 43 | 12.00 |
| 张丽云 | 1.00 | 2 | 43 | 15 | 3 | 1 | 21 | 42 | 43 | 14.00 |
| 张世芬 | 1.00 | 2 | 43 | 9  | 2 | 2 | 20 | 37 | 43 | 60.00 |
| 陈鸿娟 | 2.00 | 2 | 43 | 15 |   |   |    |    |    |       |
| 张柏芹 | 2.00 | 2 | 43 | 16 |   |   |    |    |    |       |
| 张春雨 | 2.00 | 2 | 43 | 15 |   |   |    |    |    |       |
| 吴春宏 | 1.00 | 2 | 46 | 15 | 1 | 2 | 20 | 43 | 46 | 46.00 |
| 马丽芳 | 1.00 | 2 | 47 | 12 | 2 | 1 | 20 | 47 | 47 | 1.00  |
| 郑园园 | 1.00 | 2 | 47 | 12 | 4 | 2 | 20 | 42 | 47 | 60.00 |
| 穆丹  | 1.00 | 2 | 49 | 12 | 2 | 2 | 20 | 47 | 49 | 33.00 |
| 张桂华 | 1.00 | 2 | 51 | 9  | 2 | 2 | 21 | 51 | 51 | 4.00  |
| 黄庆明 | 1.00 | 2 | 53 | 15 | 2 | 2 | 20 | 52 | 52 | 19.00 |
| 王千  | 1.00 | 2 | 53 | 9  | 2 | 2 | 20 | 53 | 53 | 8.00  |
| 王俊英 | 1.00 | 2 | 55 | 9  | 2 | 2 | 20 | 49 | 54 | 72.00 |
| 王秀敏 | 1.00 | 2 | 55 | 5  | 1 | 2 | 20 | 11 | 11 | .33   |
| 于德敏 | 1.00 | 2 | 60 | 9  | 2 |   |    |    |    |       |



| <b>course</b> | <b>noking</b> | <b>height</b> | <b>waist</b> | <b>hip</b> | <b>aist</b> | <b>thip</b> | <b>weight</b> | <b>bmi</b> | <b>p</b> | <b>n</b> | <b>g</b> |
|---------------|---------------|---------------|--------------|------------|-------------|-------------|---------------|------------|----------|----------|----------|
| 2.00          | 1             | 1.75          | 77           | 88         | .88         | 56          | 18.29         | 21         | 35       | 42       |          |
| 9.00          | 3             | 1.65          | 75           | 80         | .94         | 55          | 20.20         | 18         | 22       | 38       |          |
| 5.00          | 1             | 1.66          | 76           | 96         | .79         | 63          | 22.86         | 29         | 49       | 86       |          |
| 1.00          | 1             | 1.66          |              |            |             |             | 16.69         | 31         | 22       | 43       |          |
| 1.00          | 1             | 1.74          | 63           | 83         | .76         | 49          | 16.18         | 32         | 29       | 61       |          |
| .50           | 1             | 1.76          |              |            |             |             | 11.62         | 22         | 24       | 30       |          |
| 7.00          | 1             | 1.76          |              |            |             |             | 23.57         | 29         | 20       | 39       |          |
| .10           | 1             | 1.64          | 63           | 86         | .73         | 46          | 17.10         | 35         | 35       | 60       |          |
| 3.00          | 1             | 1.80          |              |            |             |             | 16.67         | 22         | 16       | 26       |          |
| 4.00          | 1             | 1.83          |              |            |             |             | 19.41         | 23         | 13       | 57       |          |
| 53.00         | 1             | 1.79          | 84           | 98         | .86         | 76          | 23.72         | 35         | 29       | 53       |          |
| 31.00         | 1             | 1.62          | 78           | 87         | .90         | 55          | 20.96         | 22         | 32       | 44       |          |
| 24.00         | 1             | 1.77          | 88           | 100        | .88         | 70          | 22.34         | 13         | 37       | 50       |          |
| 24.00         | 1             | 1.70          | 76           | 89         | .85         | 56          | 19.20         | 16         | 22       | 36       |          |
| 2.00          | 1             | 1.72          |              |            |             |             | 28.06         | 17         | 23       | 43       |          |
| 24.00         | 1             | 1.66          | 85           | 94         | .90         | 73          | 26.49         | 9          | 28       | 35       |          |
| .50           | 3             | 1.74          | 74           | 92         | .80         | 51          | 16.85         | 25         | 32       | 61       |          |
| 12.00         | 3             | 1.73          | 70           | 86         | .81         | 60          | 19.88         | 31         | 35       | 44       |          |
| 8.00          | 1             | 1.80          | 84           | 93         | .90         | 81          | 25.00         | 11         | 26       | 29       |          |
| 27.00         | 1             | 1.66          |              |            |             |             | 19.96         | 20         | 21       | 33       |          |
| 21.00         | 3             | 1.74          | 67           | 86         | .78         | 60          | 19.82         | 23         | 28       | 45       |          |
| 1.00          | 1             | 1.82          | 74           | 110        | .67         | 74          | 22.34         | 24         | 18       | 49       |          |
| 36.00         | 1             | 1.78          | 75           | 91         | .82         | 63          | 19.88         | 32         | 12       | 70       |          |
| 1.00          | 1             | 1.67          | 74           | 94         | .79         | 56          | 20.08         | 26         | 18       | 34       |          |
| 1.00          | 1             | 1.64          | 73           | 83         | .88         | 64          | 23.80         | 26         | 11       | 33       |          |
| 40.00         | 1             | 1.64          | 67           | 86         | .78         | 48          | 17.85         | 30         | 42       | 55       |          |
| 2.00          | 1             | 1.78          | 102          | 114        | .89         | 100         | 31.56         | 23         | 29       | 56       |          |
| 4.00          | 1             | 1.85          | 87           | 98         | .89         | 73          | 21.33         | 12         | 19       | 33       |          |
| 60.00         | 1             | 1.75          |              |            |             |             | 22.86         | 30         | 14       | 33       |          |
| 36.00         | 1             | 1.61          | 69           | 83         | .83         | 51          | 19.68         | 29         | 29       | 37       |          |
| .30           | 1             | 1.67          | 77           | 85         | .91         | 46          | 16.31         | 38         | 20       | 60       |          |
| 4.00          | 1             | 1.80          | 88           | 102        | .86         | 65          | 20.06         | 15         | 11       | 39       |          |
| 48.00         | 1             | 1.76          |              |            |             |             | 20.34         | 33         | 42       | 68       |          |
| 21.00         | 1             | 1.78          | 78           | 97         | .80         | 69          | 21.78         | 21         | 21       | 46       |          |
| 5.00          | 3             | 1.69          | 89           | 95         | .94         | 64          | 22.41         | 25         | 17       | 41       |          |
| .10           | 1             | 1.74          | 72           | 94         | .77         | 68          | 22.46         | 32         | 7        | 39       |          |
| 37.00         | 1             | 1.75          | 89           | 105        | .85         | 78          | 25.47         | 41         | 28       | 72       |          |
| .50           | 1             | 1.71          | 73           | 89         | .82         | 67          | 22.91         | 26         | 26       | 43       |          |
| .20           | 1             | 1.64          | 90           | 93         | .97         | 64          | 23.80         | 21         | 24       | 36       |          |
| 72.00         | 1             | 1.73          | 98           | 102        | .96         | 68          | 22.72         | 16         | 21       | 36       |          |
| 36.00         | 3             | 1.85          | 86           | 94         | .91         | 80          | 23.37         | 21         | 27       | 30       |          |
| 9.00          | 3             | 1.72          | 100          | 113        | .88         | 87          | 29.41         | 19         | 26       | 32       |          |
| 2.00          | 1             | 1.76          |              |            |             |             | 22.92         | 20         | 14       | 33       |          |

|       |   |      |     |     |     |     |       |    |    |    |
|-------|---|------|-----|-----|-----|-----|-------|----|----|----|
| 6.00  | 3 | 1.70 | 76  | 96  | .79 | 62  | 21.45 | 25 | 11 | 34 |
| 13.00 | 1 | 1.78 | 63  | 78  | .81 | 52  | 16.41 | 42 | 29 | 48 |
| 1.00  | 1 | 1.67 | 80  | 88  | .91 | 57  | 20.44 | 25 | 23 | 53 |
| 4.00  | 1 | 1.73 | 74  | 89  | .83 | 56  | 18.71 | 38 | 9  | 60 |
| 26.00 | 1 | 1.75 | 86  | 103 | .83 | 75  | 24.49 | 22 | 22 | 34 |
| 22.00 | 1 | 1.67 |     |     |     |     | 20.08 | 22 | 21 | 31 |
| 10.00 | 1 | 1.72 |     |     |     |     | 20.96 | 18 | 24 | 40 |
| 3.00  | 1 | 1.80 | 90  | 107 | .84 | 88  | 27.16 | 26 | 28 | 43 |
| 3.00  | 1 | 1.70 | 87  | 93  | .94 | 65  | 22.49 | 22 | 11 | 36 |
| 36.00 | 1 | 1.72 | 66  | 83  | .80 | 42  | 14.20 | 19 | 21 | 42 |
| 1.00  | 1 | 1.74 |     |     |     |     | 23.12 | 26 | 11 | 60 |
| 1.00  | 3 | 1.71 | 75  | 88  | .85 | 60  | 20.52 | 25 | 21 | 28 |
| 1.00  | 3 | 1.71 | 70  | 80  | .88 | 54  | 18.30 | 26 | 20 | 42 |
| 6.00  | 1 | 1.74 | 84  | 103 | .82 | 63  | 20.81 | 20 | 15 | 34 |
| .30   | 1 | 1.73 | 100 | 103 | .97 | 83  | 27.73 | 35 | 17 | 62 |
|       | 1 | 1.77 | 90  | 98  | .92 | 110 | 35.11 | 40 | 25 | 62 |
| 1.00  | 1 | 1.81 |     |     |     |     | 25.95 | 28 | 16 | 31 |
| 1.00  | 3 | 1.77 | 78  | 91  | .86 | 67  | 21.23 | 15 | 16 | 71 |
| 60.00 | 1 | 1.76 |     |     |     |     | 23.24 | 28 | 22 | 33 |
| 24.00 | 1 | 1.68 | 80  | 91  | .88 | 54  | 19.13 | 22 | 22 | 35 |
| 3.00  | 1 | 1.69 |     |     |     |     | 20.66 | 17 | 10 | 28 |
| 48.00 | 1 | 1.70 |     |     |     |     | 23.53 | 29 | 36 | 52 |
| 8.00  | 1 | 1.84 |     |     |     |     | 25.40 | 21 | 17 | 38 |
| 4.00  | 1 | 1.75 | 91  | 96  | .95 | 84  | 27.49 | 20 | 12 | 32 |
| 24.00 | 1 | 1.73 | 77  | 90  | .86 | 50  | 16.71 | 35 | 29 | 63 |
| .50   | 1 | 1.69 |     |     |     |     | 20.66 | 30 | 11 | 33 |
| 41.00 | 1 | 1.68 |     |     |     |     | 22.68 | 42 | 7  | 46 |
| 60.00 | 1 | 1.81 |     |     |     |     | 21.37 | 29 | 29 | 55 |
| 1.00  | 1 | 1.64 | 88  | 98  | .90 | 72  | 26.77 | 23 | 11 | 45 |
| 1.00  | 1 | 1.75 |     |     |     |     | 24.49 | 16 | 16 | 34 |
| 36.00 | 1 | 1.66 | 83  | 89  | .93 | 60  | 21.77 | 39 | 42 | 61 |
| 60.00 | 1 | 1.71 | 86  | 93  | .92 | 71  | 24.28 | 37 | 13 | 40 |
| 2.00  | 1 | 1.73 |     |     |     |     | 23.05 | 27 | 14 | 33 |
| 3.00  | 1 | 1.72 |     |     |     |     | 17.58 | 25 | 21 | 60 |
| 30.00 | 1 | 1.67 | 68  | 81  | .84 | 47  | 16.85 | 23 | 13 | 37 |

|       |   |      |    |     |     |    |       |    |    |    |
|-------|---|------|----|-----|-----|----|-------|----|----|----|
| 2.00  | 1 | 1.74 | 73 | 90  | .81 | 70 | 23.12 | 31 | 13 | 67 |
| 20.00 | 1 | 1.75 |    |     |     |    | 26.45 | 24 | 9  | 28 |
| 1.00  | 3 | 1.66 | 69 | 85  | .81 | 50 | 18.14 | 29 | 15 | 64 |
| 1.00  | 1 | 1.77 |    |     |     |    | 23.94 | 26 | 13 | 41 |
| 25.00 | 3 | 1.75 | 80 | 100 | .80 | 67 | 21.88 | 19 | 15 | 37 |
| 1.00  | 1 | 1.61 | 74 | 86  | .86 | 51 | 19.68 | 30 | 24 | 54 |
| 40.00 | 1 | 1.57 | 67 | 77  | .87 | 48 | 19.47 | 26 | 25 | 39 |
| 1.00  | 1 | 1.55 | 83 | 96  | .86 | 57 | 23.73 | 18 | 16 | 31 |
| 12.00 | 1 | 1.55 |    |     |     |    | 17.48 | 19 | 19 | 28 |
| 6.00  | 1 | 1.55 | 62 | 87  | .71 | 45 | 18.73 | 11 | 25 | 29 |
| .25   | 1 | 1.50 | 58 | 78  | .74 | 36 | 16.00 | 27 | 12 | 44 |
| 24.00 | 1 | 1.67 | 80 | 95  | .84 | 57 | 20.44 | 34 | 23 | 43 |
| 6.00  | 1 | 1.57 |    |     |     |    | 21.10 | 26 | 11 | 32 |
| .20   | 1 | 1.61 | 61 | 87  | .70 | 46 | 17.75 | 32 | 17 | 47 |
| 12.00 | 1 | 1.57 | 71 | 87  | .82 | 51 | 20.69 | 21 | 13 | 39 |
| 24.00 | 1 | 1.53 |    |     |     |    | 21.79 | 27 | 19 | 38 |
| 19.00 | 1 | 1.70 |    |     |     |    | 19.72 | 24 | 20 | 40 |
| 3.00  | 1 | 1.58 | 72 | 90  | .80 | 50 | 20.03 | 14 | 31 | 34 |
| 29.00 | 1 | 1.65 | 67 | 83  | .81 | 43 | 15.61 | 20 | 30 | 43 |
| 30.00 | 1 | 1.60 | 66 | 89  | .74 | 55 | 21.48 | 22 | 32 | 40 |
| 48.00 | 1 | 1.62 | 72 | 89  | .81 | 55 | 20.96 | 16 | 23 | 30 |
| 24.00 | 1 | 1.61 |    |     |     |    | 23.15 | 32 | 10 | 60 |
| 15.00 | 1 | 1.52 | 93 | 103 | .90 | 70 | 30.30 | 27 | 19 | 39 |
| 38.00 | 1 | 1.62 |    |     |     |    | 35.82 | 21 | 22 | 47 |
| 36.00 | 1 | 1.51 |    |     |     |    | 26.31 | 22 | 12 | 33 |
| 2.00  | 1 | 1.62 | 62 | 83  | .75 | 43 | 16.38 | 25 | 15 | 43 |
| 5.00  | 1 | 1.58 | 77 | 89  | .87 | 48 | 19.23 | 22 | 13 | 35 |
| 1.00  | 1 | 1.60 | 74 | 96  | .77 | 50 | 19.53 | 26 | 22 | 35 |
| 3.00  | 1 | 1.62 |    |     |     |    | 19.81 | 20 | 27 | 28 |
| 21.00 | 1 | 1.71 | 90 | 98  | .92 | 62 | 21.20 | 26 | 19 | 36 |
| 2.00  | 1 | 1.63 | 83 | 103 | .81 | 60 | 22.58 | 29 | 26 | 39 |
| .67   | 1 | 1.57 | 84 | 100 | .84 | 64 | 25.96 | 34 | 23 | 38 |
| 3.00  | 1 | 1.58 | 70 | 88  | .80 | 52 | 20.83 | 22 | 13 | 42 |
| 3.00  | 1 | 1.68 | 80 | 92  | .87 | 58 | 20.55 | 33 | 9  | 33 |
| 21.00 | 1 | 1.61 | 69 | 84  | .82 | 48 | 18.52 | 25 | 9  | 38 |

|       |   |      |     |     |      |    |       |    |    |    |
|-------|---|------|-----|-----|------|----|-------|----|----|----|
| .50   | 1 | 1.50 | 69  | 88  | .78  | 48 | 21.33 | 23 | 10 | 42 |
| 1.00  | 1 | 1.54 | 79  | 89  | .89  | 71 | 29.94 | 25 | 7  | 39 |
| 60.00 | 1 | 1.54 | 77  | 92  | .84  | 56 | 23.61 | 26 | 14 | 39 |
| 18.00 | 1 | 1.62 | 95  | 112 | .85  | 88 | 33.53 | 20 | 12 | 35 |
| 1.00  | 1 | 1.66 | 68  | 88  | .77  | 48 | 17.42 | 30 | 17 | 30 |
| 36.00 | 1 | 1.65 | 67  | 87  | .77  | 51 | 18.73 | 19 | 15 | 37 |
| .50   | 1 | 1.52 | 53  | 74  | .72  | 39 | 16.88 | 33 | 15 | 37 |
| .10   | 1 | 1.71 | 110 | 103 | 1.07 | 98 | 33.51 | 32 | 7  | 38 |
| 1.00  | 1 | 1.60 | 92  | 94  | .98  | 62 | 24.22 | 20 | 16 | 36 |
| 12.00 | 1 | 1.65 |     |     |      |    | 20.94 | 24 | 34 | 49 |
| .17   | 1 | 1.57 | 76  | 94  | .81  | 58 | 23.53 | 29 | 17 | 46 |
| 48.00 | 1 | 1.67 |     |     |      |    | 20.80 | 42 | 22 | 81 |
| 23.00 | 1 | 1.65 | 83  | 99  | .84  | 61 | 22.41 | 15 | 21 | 29 |
| 42.00 | 1 | 1.73 |     |     |      |    | 22.05 | 15 | 12 | 37 |
| 4.00  | 1 | 1.61 | 70  | 90  | .78  | 49 | 18.90 | 24 | 24 | 35 |
| 17.00 | 1 | 1.59 |     |     |      |    | 19.38 | 17 | 20 | 32 |
| 12.00 | 1 | 1.72 | 73  | 97  | .75  | 59 | 19.94 | 22 | 20 | 34 |
| 2.00  | 1 | 1.62 |     |     |      |    | 21.15 | 40 | 21 | 39 |
| 19.00 | 1 | 1.60 | 65  | 98  | .66  | 50 | 19.53 | 30 | 12 | 33 |
| 7.00  | 1 | 1.67 | 63  | 90  | .70  | 47 | 16.85 | 26 | 24 | 36 |
| 24.00 | 1 | 1.58 | 70  | 92  | .76  | 50 | 20.03 | 30 | 23 | 48 |
| 8.00  | 1 | 1.70 | 104 | 105 | .99  | 92 | 31.83 | 30 | 20 | 46 |
| 17.00 | 1 | 1.68 |     |     |      |    | 22.32 | 35 | 29 | 52 |
| 42.00 | 1 | 1.68 | 80  | 93  | .86  | 62 | 21.97 | 15 | 25 | 43 |
| 36.00 | 1 | 1.58 | 76  | 96  | .79  | 60 | 24.03 | 17 | 19 | 28 |
| 9.00  | 1 | 1.67 | 62  | 84  | .74  | 46 | 16.49 | 23 | 10 | 30 |
| 83.00 | 1 | 1.57 |     |     |      |    | 26.78 | 30 | 14 | 39 |
| 48.00 | 1 | 1.63 | 70  | 90  | .78  | 49 | 18.44 | 22 | 11 | 30 |
| 6.00  | 1 | 1.72 | 64  | 86  | .74  | 52 | 17.58 | 25 | 15 | 38 |
| 59.00 | 1 | 1.53 |     |     |      |    | 30.33 | 28 | 21 | 40 |
| 25.00 | 1 | 1.57 |     |     |      |    | 24.75 | 19 | 24 | 38 |
| 48.00 | 1 | 1.60 | 74  | 89  | .83  | 48 | 18.75 | 22 | 15 | 30 |
| 60.00 | 1 | 1.50 | 70  | 86  | .81  | 44 | 19.56 | 33 | 28 | 46 |
| 16.00 | 1 | 1.55 | 62  | 86  | .72  | 45 | 18.73 | 26 | 21 | 44 |
| 6.00  | 1 | 1.66 |     |     |      |    | 29.03 | 31 | 17 | 42 |
| 2.00  | 1 | 1.60 |     |     |      |    | 21.88 | 24 | 19 | 36 |
| 32.00 | 1 | 1.60 |     |     |      |    | 21.88 | 30 | 25 | 44 |
| 48.00 | 1 | 1.66 | 86  | 105 | .82  | 72 | 26.13 | 27 | 18 | 52 |
| 13.00 | 1 | 1.58 | 78  | 88  | .89  | 59 | 23.63 | 33 | 34 | 50 |
| 30.00 | 1 | 1.60 | 70  | 90  | .78  | 53 | 20.70 | 26 | 14 | 30 |
| .40   | 1 | 1.65 |     |     |      |    | 21.67 | 36 | 10 | 31 |

|       |   |      |    |     |     |    |       |    |    |    |
|-------|---|------|----|-----|-----|----|-------|----|----|----|
| 1.00  | 1 | 1.61 | 86 | 98  | .88 | 70 | 27.01 | 28 | 15 | 38 |
| .20   | 1 | 1.60 |    |     |     |    | 28.52 | 28 | 7  | 24 |
| 24.00 | 1 | 1.51 | 65 | 86  | .76 | 45 | 19.74 | 17 | 21 | 33 |
| 30.00 | 1 | 1.74 |    |     |     |    | 22.79 | 29 | 7  | 36 |
| 12.00 | 1 | 1.54 |    |     |     |    | 19.82 | 20 | 10 | 38 |
| 14.00 | 1 | 1.68 | 70 | 87  | .80 | 51 | 18.07 | 15 | 16 | 35 |
| 60.00 | 1 | 1.61 | 73 | 87  | .84 | 52 | 20.06 | 26 | 15 | 30 |
| 46.00 | 1 | 1.53 |    |     |     |    | 20.93 | 20 | 14 | 27 |
| 1.00  | 1 | 1.52 |    |     |     |    | 23.81 | 22 | 22 | 43 |
| 60.00 | 3 | 1.50 | 94 | 107 | .88 | 68 | 30.22 | 30 | 25 | 49 |
| 33.00 | 1 | 1.72 |    |     |     |    | 22.31 | 21 | 14 | 31 |
| 4.00  | 1 | 1.52 | 85 | 96  | .89 | 57 | 24.67 | 32 | 19 | 44 |
| 19.00 | 1 | 1.60 | 75 | 92  | .82 | 53 | 20.70 | 19 | 20 | 41 |
| 8.00  | 1 | 1.63 |    |     |     |    | 23.34 | 24 | 7  | 55 |
| 72.00 | 1 | 1.62 | 78 | 92  | .85 | 59 | 22.48 | 27 | 11 | 31 |
| .33   | 1 | 1.62 | 86 | 100 | .86 | 66 | 25.15 | 25 | 24 | 44 |



|     |   |    |     |       |       |       |       |       |      |       |  |
|-----|---|----|-----|-------|-------|-------|-------|-------|------|-------|--|
| 70  | 5 | 10 |     |       |       |       |       |       |      |       |  |
|     |   |    | .30 | 85.00 | 27.00 | 23.00 | 24.00 | 19.00 | 3.00 | 31.00 |  |
| 119 | 6 | 24 | .22 | 15.00 | 17.00 | 16.00 | 18.00 | 1.00  | .69  | 10.00 |  |
| 101 | 6 | 21 | .26 | 55.00 | 28.00 | 22.00 | 20.00 | 24.00 | 3.22 | 30.00 |  |
| 107 | 6 | 46 | .24 | 51.00 | 30.00 | 5.00  | 18.00 | 9.00  | 2.30 | 27.00 |  |
| 78  | 5 | 12 | .22 | 40.00 | 24.00 | 15.00 | 19.00 | 6.00  | 1.95 | 18.00 |  |
| 74  | 5 | 6  |     |       |       |       |       |       |      |       |  |
| 82  | 6 | 12 |     |       |       |       |       |       |      |       |  |
|     |   |    | .29 | 53.00 | 31.00 | 22.00 | 26.00 | 20.00 | 3.04 | 32.00 |  |
|     |   |    | .26 | 57.00 | 35.00 | 15.00 | 25.00 | 20.00 | 3.04 | 35.00 |  |
| 97  | 6 | 16 | .27 | 51.00 | 26.00 | 17.00 | 22.00 | 20.00 | 3.04 | 32.00 |  |
| 69  | 5 | 18 | .23 | 26.00 | 24.00 | 14.00 | 14.00 | 16.00 | 2.83 | 14.00 |  |
| 82  | 6 | 21 | .24 | 37.00 | 27.00 | 19.00 | 26.00 | 19.00 | 3.00 | 30.00 |  |
| 97  | 5 | 37 |     |       |       |       |       |       |      |       |  |
|     |   |    | .32 | 51.00 | 31.00 | 17.00 | 25.00 | 23.00 | 3.18 | 30.00 |  |
|     |   |    | .31 | 70.00 | 32.00 | 21.00 | 26.00 | 23.00 | 3.18 | 35.00 |  |
| 74  | 4 | 22 | .27 | 38.00 | 18.00 | 14.00 | 16.00 | 7.00  | 2.08 | 29.00 |  |
|     |   |    | .25 | 39.00 | 31.00 | 18.00 | 24.00 | 11.00 | 2.48 | 27.00 |  |
| 88  | 5 | 15 | .23 | 31.00 | 17.00 | 12.00 | 22.00 | 20.00 | 3.04 | 17.00 |  |
|     |   |    | .32 | 66.00 | 26.00 | 22.00 | 24.00 | 17.00 | 2.89 | 30.00 |  |
| 69  | 5 | 33 | .28 | 53.00 | 27.00 | 18.00 | 20.00 | 10.00 | 2.40 | 22.00 |  |
| 114 | 6 | 26 | .25 | 25.00 | 18.00 | 11.00 | 4.00  | 3.00  | 1.39 | 22.00 |  |
| 127 | 6 | 36 | .25 | 50.00 | 20.00 | 11.00 | 24.00 | 7.00  | 2.08 | 32.00 |  |
| 75  | 5 | 13 |     |       |       |       |       |       |      |       |  |
| 102 | 6 | 55 |     |       |       |       |       |       |      |       |  |
| 83  | 6 | 6  |     |       |       |       |       |       |      |       |  |
| 79  |   | 6  | .22 | 23.00 | 18.00 | 5.00  | 12.00 | 5.00  | 1.79 | 13.00 |  |
| 55  | 3 | 15 |     |       |       |       |       |       |      |       |  |
|     |   |    | .30 | 80.00 | 34.00 | 17.00 | 28.00 | 25.00 | 3.26 | 33.00 |  |
| 117 | 6 | 26 |     |       |       |       |       |       |      |       |  |
| 76  | 5 | 11 |     |       |       |       |       |       |      |       |  |
| 64  | 5 | 11 | .24 | 37.00 | 28.00 | 19.00 | 25.00 | 7.00  | 2.08 | 28.00 |  |
| 127 | 6 | 21 | .26 | 42.00 | 25.00 | 19.00 | 21.00 | 11.00 | 2.48 | 21.00 |  |
| 74  | 6 | 7  |     |       |       |       |       |       |      |       |  |
| 95  | 6 | 13 |     |       |       |       |       |       |      |       |  |
| 113 | 6 | 13 |     |       |       |       |       |       |      |       |  |
| 79  | 6 | 13 | .26 | 22.00 | 25.00 | 16.00 | 19.00 | 4.00  | 1.61 | 16.00 |  |
| 66  | 5 | 14 |     |       |       |       |       |       |      |       |  |
| 142 | 6 | 26 |     |       |       |       |       |       |      |       |  |
| 90  | 6 | 7  | .24 | 37.00 | 18.00 | 10.00 | 24.00 | 5.00  | 1.79 | 17.00 |  |
|     |   |    | .32 | 61.00 | 31.00 | 21.00 | 24.00 | 25.00 | 3.26 | 33.00 |  |
| 74  | 6 | 3  |     |       |       |       |       |       |      |       |  |
| 106 | 6 | 20 |     |       |       |       |       |       |      |       |  |
|     |   |    | .31 | 68.00 | 35.00 | 20.00 | 26.00 | 24.00 | 3.22 | 28.00 |  |
| 73  | 4 | 9  | .25 | 37.00 | 33.00 | 15.00 | 22.00 | 8.00  | 2.20 | 28.00 |  |







|     |   |    |     |       |       |       |       |       |      |       |
|-----|---|----|-----|-------|-------|-------|-------|-------|------|-------|
| 81  | 6 | 30 | .23 | 51.00 | 34.00 | 17.00 | 22.00 | 3.00  | 1.39 | 24.00 |
| 59  | 5 | 7  |     |       |       |       |       |       |      |       |
| 71  | 5 | 4  | .27 | 47.00 | 29.00 | 21.00 | 19.00 | 6.00  | 1.95 | 28.00 |
| 72  | 6 | 12 |     |       |       |       |       |       |      |       |
| 68  | 5 | 32 |     |       |       |       |       |       |      |       |
| 66  | 5 | 4  |     |       |       |       |       |       |      |       |
| 71  | 6 | 9  | .26 | 24.00 | 25.00 | 27.00 | 16.00 | 4.00  | 1.61 | 11.00 |
|     |   |    | .27 | 50.00 | 29.00 | 16.00 | 25.00 | 11.00 | 2.48 | 25.00 |
|     |   |    | .27 | 62.00 | 24.00 | 13.00 | 18.00 | 11.00 | 2.48 | 26.00 |
|     |   |    | .25 | 63.00 | 26.00 | 12.00 | 27.00 | 22.00 | 3.14 | 30.00 |
| 61  | 4 | 11 |     |       |       |       |       |       |      |       |
| 87  | 6 | 17 |     |       |       |       |       |       |      |       |
| 104 | 7 | 19 | .20 | 17.00 | 15.00 | 11.00 | 14.00 | 1.00  | .69  | 8.00  |
| 66  | 5 | 18 |     |       |       |       |       |       |      |       |
| 95  | 5 | 13 |     |       |       |       |       |       |      |       |
| 80  | 6 | 19 |     |       |       |       |       |       |      |       |
| 86  | 6 | 29 |     |       |       |       |       |       |      |       |
| 69  | 5 | 12 |     |       |       |       |       |       |      |       |
| 93  | 6 | 8  | .23 | 8.00  | 16.00 | 12.00 | 12.00 | 5.00  | 1.79 | 17.00 |
|     |   |    | .26 | 39.00 | 26.00 | 8.00  | 19.00 | 2.00  | 1.10 | 20.00 |

| <b>cf</b> | <b>eit</b> | <b>cptd3</b> | <b>score</b> | <b>stroop</b> | <b>ep</b> | <b>dspan</b> | <b>score</b> | <b>tmt</b> | <b>sc</b> | <b>hvit</b> |
|-----------|------------|--------------|--------------|---------------|-----------|--------------|--------------|------------|-----------|-------------|
| 19.00     | 4.17       | .45          | 31.00        | 28.00         | 3.10      | 18.0         | 31.00        | 43         | 32        | 42          |
| 16.00     | 7.70       | 1.06         | 35.00        | 30.00         | 7.92      | 15.0         | 34.00        | 48         | 33        | 35          |
| 23.00     | 5.97       | 1.02         | 31.00        | 27.00         | 2.10      | 13.0         | 29.00        | 32         | 27        | 37          |
| 19.00     | 4.88       |              |              | 12.00         | 13.13     | 14.0         | 25.00        | 36         | 18        | 30          |
| 26.00     | 9.46       | 1.08         | 47.00        | 31.00         | 11.71     | 17.0         | 36.00        | 50         | 29        | 49          |
| 20.00     | 8.62       | .20          | 33.00        | 20.00         | 11.80     | 14.0         | 31.00        | 39         | 40        | 28          |
| 20.00     | 7.91       | 2.55         | 49.00        | 37.00         | 9.81      | 24.0         | 31.00        | 54         | 51        | 60          |
| 28.00     | 9.31       | 1.94         | 48.00        | 12.00         | 4.41      | 14.0         | 34.00        | 54         | 28        | 58          |
| 12.00     | 8.46       | 1.22         | 47.00        | 15.00         | 8.93      | 19.0         | 34.00        | 51         | 33        | 51          |
| 22.00     | 8.54       | 1.52         | 44.00        | 24.00         | 12.91     | 14.0         | 27.00        | 38         | 44        | 58          |
| 11.00     | 8.84       | .29          | 24.00        | 16.00         | 8.08      | 12.0         | 21.00        | 35         | 4         | 28          |
| 19.00     | 6.43       | 1.59         | 42.00        | 39.00         | 10.68     | 19.0         | 34.00        | 45         | 55        | 40          |
| 19.00     | 10.71      | 3.13         | 60.00        | 54.00         | 10.19     | 25.0         | 34.00        | 61         | 53        | 53          |
| 20.00     | 3.87       | 2.16         | 32.00        | 45.00         | 2.87      | 17.0         | 27.00        | 48         | 23        | 35          |
| 23.00     | 9.99       | 1.65         | 50.00        | 41.00         | 2.80      | 19.0         | 36.00        | 41         | 40        | 51          |
| 24.00     | 9.30       | .79          | 38.00        | 34.00         | 10.99     | 16.0         | 32.00        | 40         | 34        | 40          |
| 21.00     | 8.51       | 2.62         | 61.00        | 47.00         | 11.66     | 19.0         | 36.00        | 52         | 53        | 58          |
| 16.00     | 8.35       | 1.07         | 37.00        | 40.00         | 2.51      | 15.0         | 31.00        | 51         | 34        | 44          |
| 19.00     | 6.23       | 1.48         | 52.00        | 41.00         | 1.53      | 28.0         | 40.00        | 37         | 18        | 76          |
| .00       | 10.35      |              |              | 16.00         | 12.85     | 10.0         | 2.00         | 39         | 25        | 8           |
| 17.00     | 10.74      | .57          | 33.00        | 20.00         | 6.87      | 9.0          | 27.00        | 40         | 23        | 19          |
| 20.00     | 11.32      | 1.76         | 51.00        | 39.00         | 11.07     | 25.0         | 30.00        | 56         | 49        | 46          |
| 23.00     | 7.03       | 1.31         | 47.00        | 39.00         | 11.40     | 13.0         | 34.00        | 58         | 59        | 40          |
| 21.00     | 8.86       | 2.84         | 48.00        | 39.00         | 3.67      | 24.0         | 34.00        | 37         | 23        | 44          |
| 21.00     | 7.94       | 1.09         | 46.00        | 41.00         | 8.43      | 10.0         | 38.00        | 51         | 54        | 42          |
| 31.00     | 9.72       | 2.66         | 53.00        | 36.00         | 2.70      |              | 8.00         | 39         | 36        | 60          |
| 20.00     | 8.92       | 2.23         | 48.00        | 40.00         | 8.01      | 15.0         | 31.00        | 63         | 51        | 35          |
| 35.00     | 7.74       | 1.23         | 46.00        | 28.00         | 5.12      | 17.0         | 34.00        | 35         | 39        | 56          |
| 13.00     | 8.96       | .39          |              | 3.00          | 8.41      | 15.0         | 14.00        | 43         |           | 26          |
| 16.00     | 8.91       | 1.67         | 39.00        | 34.00         | 7.84      | 22.0         | 27.00        | 39         | 33        | 37          |
| 10.00     | 6.87       | 1.73         | 32.00        | 49.00         | 8.35      | 11.0         | 25.00        | 50         | 30        | 35          |
| 17.00     | 5.72       | 1.78         | 43.00        | 35.00         | 9.86      | 20.0         | 36.00        | 53         | 44        | 35          |

|       |       |      |       |       |       |      |       |    |    |    |
|-------|-------|------|-------|-------|-------|------|-------|----|----|----|
| 35.00 | 11.15 | 3.05 | 69.00 | 58.00 | 7.66  | 26.0 |       | 63 | 83 | 56 |
| 12.00 | 4.88  |      |       | 10.00 | 13.30 | 14.0 | 27.00 | 35 | 15 | 33 |
| 26.00 | 11.47 | 2.11 | 62.00 | 68.00 | 6.30  | 22.0 | 38.00 | 50 | 54 | 58 |
| 26.00 | 6.99  | 1.19 | 44.00 | 58.00 | 2.00  | 20.0 | 34.00 | 43 | 50 | 62 |
| 22.00 | 9.91  |      |       | 27.00 | 1.93  | 22.0 | 29.00 | 36 | 39 | 49 |
| 22.00 | 9.04  | 2.79 | 63.00 | 41.00 | 1.85  | 25.0 |       | 58 | 52 | 65 |
| 28.00 | 10.63 | 4.05 | 68.00 | 60.00 | 9.56  | 22.0 |       | 49 | 56 | 74 |
| 33.00 | 9.84  | 1.79 | 57.00 | 42.00 | 10.10 | 18.0 | 38.00 | 51 | 50 | 53 |
| 19.00 | 11.22 | 1.45 | 44.00 | 17.00 | 7.64  | 17.0 | 29.00 | 39 | 26 | 49 |
| 31.00 | 11.65 | 2.86 | 61.00 | 47.00 | 11.18 | 21.0 | 38.00 | 42 | 36 | 56 |
| 24.00 | 11.48 | 3.35 | 66.00 | 72.00 | 10.63 | 27.0 |       | 69 | 50 | 65 |
| 27.00 | 10.78 | 3.39 | 71.00 | 69.00 | 4.74  | 20.0 | 34.00 | 68 | 68 | 67 |
| 15.00 | 6.87  | .94  | 38.00 | 35.00 | 9.57  | 17.0 | 29.00 | 51 | 37 | 35 |
| 19.00 | 10.74 | 2.40 | 56.00 | 48.00 | 12.52 | 22.0 |       | 47 | 38 | 65 |
| 25.00 | 9.12  | 2.25 | 45.00 | 28.00 | 7.07  | 20.0 | 36.00 | 39 | 31 | 33 |
| 19.00 | 11.54 | 3.63 | 66.00 | 54.00 | 9.93  | 20.0 |       | 69 | 65 | 53 |
| 22.00 | 7.75  | 2.00 | 50.00 | 55.00 | 5.08  | 17.0 | 40.00 | 55 | 52 | 56 |
| 22.00 | 6.74  | -.17 | 27.00 | 17.00 | 12.65 | 9.0  | 15.00 | 46 | 25 | 35 |
| 19.00 | 10.84 | 2.60 | 50.00 | 52.00 | 8.31  | 26.0 | 38.00 | 45 | 49 | 40 |
| 17.00 | 5.80  | 1.58 | 27.00 | 22.00 | 3.79  | 17.0 | 32.00 | 36 | 23 | 35 |
| 35.00 | 9.37  | 3.58 | 72.00 | 67.00 | 8.00  | 28.0 |       | 64 | 78 | 72 |
| 23.00 | 11.08 | 1.62 | 55.00 | 46.00 | 13.01 | 20.0 | 31.00 | 44 | 39 | 57 |
| 22.00 | 6.82  | 1.44 | 46.00 | 24.00 | 4.85  | 14.0 | 36.00 | 51 | 41 | 51 |
| 24.00 | 9.93  | 1.82 | 43.00 | 34.00 | 12.89 | 13.0 | 32.00 | 51 | 22 | 51 |
| 26.00 | 4.88  | 1.42 | 34.00 | 30.00 | 3.58  | 21.0 | 27.00 | 43 | 36 | 35 |
| 25.00 | 8.67  | 3.52 | 67.00 | 51.00 | 4.08  | 19.0 |       | 69 | 60 | 65 |
| 31.00 | 5.90  | 2.71 | 63.00 | 70.00 | 7.89  | 24.0 |       | 68 | 67 | 74 |
| 10.00 | 5.00  | 1.80 | 55.00 | 23.00 | 11.31 | 21.0 | 36.00 | 50 | 49 | 81 |

|       |      |     |       |       |      |      |       |    |    |    |
|-------|------|-----|-------|-------|------|------|-------|----|----|----|
| 25.00 | 7.67 | .71 | 38.00 | 29.00 | 7.85 | 14.0 | 34.00 | 44 | 47 | 44 |
|-------|------|-----|-------|-------|------|------|-------|----|----|----|

|       |      |      |       |       |      |      |       |    |    |    |
|-------|------|------|-------|-------|------|------|-------|----|----|----|
| 26.00 | 9.24 | 2.61 | 59.00 | 54.00 | 8.55 | 20.0 | 38.00 | 48 | 59 | 54 |
|-------|------|------|-------|-------|------|------|-------|----|----|----|

---

|       |      |      |       |       |      |      |       |    |    |    |
|-------|------|------|-------|-------|------|------|-------|----|----|----|
| 19.00 | 7.10 | 2.71 | 53.00 | 39.00 | 7.71 | 26.0 | 32.00 | 43 | 51 | 54 |
|-------|------|------|-------|-------|------|------|-------|----|----|----|

|      |      |     |       |       |      |      |       |    |    |    |
|------|------|-----|-------|-------|------|------|-------|----|----|----|
| 8.00 | 6.91 | .97 | 37.00 | 15.00 | 2.39 | 11.0 | 23.00 | 41 | 40 | 45 |
|------|------|-----|-------|-------|------|------|-------|----|----|----|

|       |       |      |       |       |      |      |       |    |    |    |
|-------|-------|------|-------|-------|------|------|-------|----|----|----|
| 27.00 | 10.00 | 2.22 | 54.00 | 39.00 | 6.46 | 24.0 | 34.00 | 42 | 47 | 59 |
|-------|-------|------|-------|-------|------|------|-------|----|----|----|

|       |      |      |       |       |      |  |       |    |    |    |
|-------|------|------|-------|-------|------|--|-------|----|----|----|
| 15.00 | 9.91 | 1.72 | 45.00 | 22.00 | 5.48 |  | 25.00 | 49 | 20 | 53 |
|-------|------|------|-------|-------|------|--|-------|----|----|----|

|       |      |      |       |       |      |      |       |    |    |    |
|-------|------|------|-------|-------|------|------|-------|----|----|----|
| 12.00 | 8.85 | 2.18 | 50.00 | 53.00 | 8.05 | 19.0 | 27.00 | 37 | 56 | 56 |
|-------|------|------|-------|-------|------|------|-------|----|----|----|

|       |      |      |       |       |       |      |       |    |    |    |
|-------|------|------|-------|-------|-------|------|-------|----|----|----|
| 13.00 | 4.36 | 1.25 | 41.00 | 20.00 | 11.73 | 19.0 | 29.00 | 42 | 33 | 51 |
|-------|------|------|-------|-------|-------|------|-------|----|----|----|

|       |      |      |       |       |      |      |       |    |    |    |
|-------|------|------|-------|-------|------|------|-------|----|----|----|
| 25.00 | 8.65 | 1.38 | 51.00 | 30.00 | 8.70 | 16.0 | 34.00 | 57 | 50 | 54 |
|-------|------|------|-------|-------|------|------|-------|----|----|----|

|       |       |      |       |       |       |      |       |    |    |    |
|-------|-------|------|-------|-------|-------|------|-------|----|----|----|
| 36.00 | 10.12 | 1.99 | 47.00 | 60.00 | 10.46 | 15.0 | 34.00 | 43 | 40 | 56 |
|-------|-------|------|-------|-------|-------|------|-------|----|----|----|

|       |      |      |       |       |      |      |       |    |    |    |
|-------|------|------|-------|-------|------|------|-------|----|----|----|
| 16.00 | 8.52 | 2.73 | 52.00 | 64.00 | 3.88 | 20.0 | 34.00 | 48 | 50 | 49 |
|-------|------|------|-------|-------|------|------|-------|----|----|----|

|       |      |      |       |       |       |      |       |    |    |    |
|-------|------|------|-------|-------|-------|------|-------|----|----|----|
| 10.00 | 6.90 | 2.37 | 37.00 | 45.00 | 12.80 | 20.0 | 29.00 | 41 | 40 | 41 |
|-------|------|------|-------|-------|-------|------|-------|----|----|----|

|       |      |     |       |       |      |      |       |    |    |    |
|-------|------|-----|-------|-------|------|------|-------|----|----|----|
| 22.00 | 7.14 | .13 | 31.00 | 30.00 | 9.15 | 13.0 | 15.00 | 43 | 33 | 38 |
|-------|------|-----|-------|-------|------|------|-------|----|----|----|

|       |      |     |       |       |      |      |       |    |    |    |
|-------|------|-----|-------|-------|------|------|-------|----|----|----|
| 17.00 | 6.78 | .43 | 38.00 | 10.00 | 8.51 | 11.0 | 21.00 | 46 | 35 | 38 |
|-------|------|-----|-------|-------|------|------|-------|----|----|----|

|       |      |      |       |       |      |      |       |    |    |    |
|-------|------|------|-------|-------|------|------|-------|----|----|----|
| 11.00 | 8.40 | 1.56 | 41.00 | 40.00 | 8.19 | 16.0 | 25.00 | 44 | 37 | 45 |
|-------|------|------|-------|-------|------|------|-------|----|----|----|

|       |       |      |       |       |      |      |  |    |    |    |
|-------|-------|------|-------|-------|------|------|--|----|----|----|
| 27.00 | 12.05 | 3.31 | 64.00 | 62.00 | 9.71 | 17.0 |  | 45 | 60 | 57 |
|-------|-------|------|-------|-------|------|------|--|----|----|----|

|       |      |      |       |       |      |      |       |    |    |    |
|-------|------|------|-------|-------|------|------|-------|----|----|----|
| 17.00 | 6.94 | 2.12 | 43.00 | 30.00 | 5.56 | 14.0 | 27.00 | 45 | 38 | 45 |
|-------|------|------|-------|-------|------|------|-------|----|----|----|

|       |       |      |       |       |       |      |  |    |    |    |
|-------|-------|------|-------|-------|-------|------|--|----|----|----|
| 28.00 | 12.13 | 3.94 | 66.00 | 51.00 | 10.86 | 26.0 |  | 47 | 59 | 59 |
|-------|-------|------|-------|-------|-------|------|--|----|----|----|

|       |      |      |       |       |      |      |       |    |    |    |
|-------|------|------|-------|-------|------|------|-------|----|----|----|
| 20.00 | 9.00 | 3.01 | 56.00 | 41.00 | 9.18 | 19.0 | 34.00 | 54 | 49 | 45 |
|-------|------|------|-------|-------|------|------|-------|----|----|----|

|       |       |      |       |       |       |      |  |    |    |    |
|-------|-------|------|-------|-------|-------|------|--|----|----|----|
| 15.00 | 12.58 | 2.51 | 54.00 | 49.00 | 10.12 | 21.0 |  | 46 | 44 | 49 |
|-------|-------|------|-------|-------|-------|------|--|----|----|----|

|       |      |      |       |       |      |      |  |    |    |    |
|-------|------|------|-------|-------|------|------|--|----|----|----|
| 23.00 | 9.38 | 1.63 | 56.00 | 34.00 | 4.27 | 18.0 |  | 58 | 59 | 54 |
|-------|------|------|-------|-------|------|------|--|----|----|----|

|       |      |      |       |       |       |      |       |    |    |    |
|-------|------|------|-------|-------|-------|------|-------|----|----|----|
| 24.00 | 8.06 | 2.98 | 57.00 | 64.00 | 12.38 | 21.0 | 36.00 | 51 | 49 | 65 |
|-------|------|------|-------|-------|-------|------|-------|----|----|----|

|       |      |     |       |       |      |      |       |    |    |    |
|-------|------|-----|-------|-------|------|------|-------|----|----|----|
| 23.00 | 7.58 | .84 | 41.00 | 47.00 | 2.48 | 10.0 | 29.00 | 40 | 38 | 56 |
|-------|------|-----|-------|-------|------|------|-------|----|----|----|

|      |      |      |       |       |       |      |       |    |    |    |
|------|------|------|-------|-------|-------|------|-------|----|----|----|
| 7.00 | 6.10 | 2.07 | 39.00 | 54.00 | 13.30 | 22.0 | 36.00 | 42 | 38 | 62 |
|------|------|------|-------|-------|-------|------|-------|----|----|----|

|       |      |      |       |       |      |      |       |    |    |    |
|-------|------|------|-------|-------|------|------|-------|----|----|----|
| 16.00 | 8.17 | 2.33 | 55.00 | 51.00 | 6.42 | 18.0 | 34.00 | 51 | 60 | 51 |
|-------|------|------|-------|-------|------|------|-------|----|----|----|

|       |      |      |       |       |       |      |       |    |    |    |
|-------|------|------|-------|-------|-------|------|-------|----|----|----|
| 20.00 | 8.88 | 1.48 | 52.00 | 50.00 | 11.27 | 19.0 | 29.00 | 41 | 56 | 45 |
|-------|------|------|-------|-------|-------|------|-------|----|----|----|

|       |      |      |       |       |       |      |  |    |    |    |
|-------|------|------|-------|-------|-------|------|--|----|----|----|
| 24.00 | 9.95 | 3.58 | 60.00 | 47.00 | 12.88 | 27.0 |  | 49 | 58 | 59 |
|-------|------|------|-------|-------|-------|------|--|----|----|----|

|       |       |      |       |       |       |      |       |    |    |    |
|-------|-------|------|-------|-------|-------|------|-------|----|----|----|
| 23.00 | 10.49 | 2.36 | 51.00 | 46.00 | 11.29 | 23.0 | 36.00 | 47 | 56 | 51 |
|-------|-------|------|-------|-------|-------|------|-------|----|----|----|

|       |      |      |       |       |      |      |       |    |    |    |
|-------|------|------|-------|-------|------|------|-------|----|----|----|
| 25.00 | 8.02 | 1.69 | 51.00 | 34.00 | 9.13 | 13.0 | 34.00 | 53 | 54 | 43 |
|-------|------|------|-------|-------|------|------|-------|----|----|----|

|       |      |      |       |       |       |      |       |    |    |    |
|-------|------|------|-------|-------|-------|------|-------|----|----|----|
| 25.00 | 8.57 | 1.92 | 51.00 | 50.00 | 11.48 | 20.0 | 32.00 | 36 | 48 | 51 |
|-------|------|------|-------|-------|-------|------|-------|----|----|----|

|       |      |      |       |       |       |      |  |    |    |    |
|-------|------|------|-------|-------|-------|------|--|----|----|----|
| 28.00 | 8.81 | 3.94 | 68.00 | 52.00 | 12.29 | 24.0 |  | 60 | 60 | 65 |
|-------|------|------|-------|-------|-------|------|--|----|----|----|

|       |      |      |       |       |       |      |       |    |    |    |
|-------|------|------|-------|-------|-------|------|-------|----|----|----|
| 19.00 | 7.20 | 2.30 | 46.00 | 42.00 | 10.16 | 12.0 | 25.00 | 48 | 38 | 56 |
|-------|------|------|-------|-------|-------|------|-------|----|----|----|

|       |       |      |       |       |       |      |       |    |    |    |
|-------|-------|------|-------|-------|-------|------|-------|----|----|----|
| 13.00 | 10.23 | 1.23 | 38.00 | 20.00 | 6.67  | 16.0 | 29.00 | 40 | 36 | 45 |
| 27.00 | 9.54  | 2.87 | 60.00 | 61.00 | 6.72  | 25.0 | 36.00 | 59 | 61 | 59 |
| 28.00 | 10.05 | 2.48 | 64.00 | 46.00 | 10.82 | 27.0 |       | 57 | 62 | 59 |
| 32.00 | 11.46 | 1.38 | 58.00 | 54.00 | 8.69  | 20.0 | 36.00 | 52 | 49 | 56 |
| 20.00 | 7.56  | 2.14 | 55.00 | 51.00 | 3.63  | 20.0 | 38.00 | 62 | 55 | 64 |
| 20.00 | 8.45  | 2.13 | 54.00 | 27.00 | 8.94  | 18.0 | 32.00 | 56 | 42 | 59 |
| 23.00 | 6.68  | 2.44 | 52.00 | 43.00 | 7.13  | 20.0 | 36.00 | 43 | 37 | 57 |
| 17.00 | 10.31 | 1.80 | 52.00 | 38.00 | 7.28  | 14.0 | 32.00 | 53 | 56 | 51 |
| 22.00 | 12.47 | 1.69 | 49.00 | 25.00 | 10.64 | 23.0 | 34.00 | 41 | 40 | 46 |
| 18.00 | 8.42  | 1.10 | 35.00 | 40.00 | 3.80  | 16.0 | 32.00 | 47 | 38 | 32 |
| 22.00 | 10.03 | 2.00 | 52.00 | 41.00 | 1.36  | 23.0 | 34.00 | 53 | 46 | 57 |
| 20.00 | 11.12 | 2.77 | 58.00 | 56.00 | 10.98 | 27.0 |       | 51 | 45 | 60 |
| 26.00 | 12.62 | 3.19 | 70.00 | 57.00 | 10.96 | 25.0 |       | 54 | 60 | 68 |
| 26.00 | 10.48 | 2.26 | 52.00 | 56.00 | 8.28  | 15.0 | 36.00 | 45 | 49 | 56 |
| 24.00 | 6.30  |      |       | 56.00 | 3.16  |      | .00   | 58 | 49 | 60 |
| 24.00 | 6.80  | 1.43 | 52.00 | 64.00 | 8.56  | 19.0 | 36.00 | 53 | 47 | 54 |
| 13.00 | 5.62  | .67  | 33.00 | 11.00 | 4.77  | 15.0 | 23.00 | 42 | 32 | 51 |
| 15.00 | 8.65  | 2.34 | 48.00 | 48.00 | 10.35 | 22.0 | 34.00 | 51 | 38 | 43 |
| 21.00 | 8.27  | 1.19 | 37.00 | 38.00 | 5.18  | 15.0 | 30.00 | 48 | 44 | 37 |
| 29.00 | 11.97 | 2.75 | 61.00 | 47.00 | 9.12  | 22.0 | 38.00 | 60 | 44 | 65 |
| 26.00 | 10.48 | 2.64 | 56.00 | 57.00 | 5.58  | 22.0 | 38.00 | 42 | 47 | 57 |
| 22.00 | 9.31  | 2.96 | 59.00 | 50.00 | 3.05  | 22.0 | 40.00 | 45 | 58 | 59 |
| 21.00 | 10.70 | .79  | 49.00 | 43.00 | 5.04  | 12.0 | 34.00 | 55 | 48 | 54 |
| 25.00 | 12.01 | 1.69 | 57.00 | 45.00 | 9.89  | 21.0 | 40.00 | 57 | 49 | 62 |
| 25.00 | 6.48  | .46  | 34.00 | 30.00 | 5.18  | 14.0 | 20.00 | 40 | 26 | 40 |
| 11.00 | 4.74  | .03  | 24.00 | 21.00 | 11.72 | 12.0 | 21.00 | 44 | 24 | 35 |
| 21.00 | 6.87  | .84  | 44.00 | 44.00 | 3.65  | 21.0 | 34.00 | 38 | 42 | 51 |
| 14.00 |       | .20  |       | 21.00 | 10.39 | 10.0 | 4.00  | 45 | 31 | 32 |
| 28.00 | 10.02 | .80  | 58.00 | 33.00 | 8.90  | 15.0 | 38.00 | 46 | 47 | 63 |

|       |       |      |       |       |       |      |       |    |    |    |
|-------|-------|------|-------|-------|-------|------|-------|----|----|----|
| 22.00 | 10.49 | 3.10 | 66.00 | 60.00 | 7.27  | 20.0 | 36.00 | 42 | 61 | 75 |
| 24.00 | 9.59  | 1.88 | 66.00 | 41.00 | 12.15 | 21.0 | 40.00 | 62 | 58 | 67 |
| 13.00 | 8.78  | .71  | 41.00 | 20.00 | 12.37 | 17.0 | 21.00 | 59 | 38 | 60 |
| 18.00 | 12.12 | 2.88 | 71.00 | 45.00 | 11.64 | 25.0 |       | 62 | 60 | 67 |
| 21.00 | 6.29  | 2.07 | 58.00 | 56.00 | 12.59 | 15.0 |       | 63 | 71 | 58 |
| 28.00 | 12.35 | 3.48 | 77.00 | 47.00 | 8.07  | 23.0 | 38.00 | 55 | 72 | 62 |
| 17.00 | 7.42  | .57  | 33.00 | 26.00 | 10.97 | 13.0 | 21.00 | 29 | 32 | 43 |
| 16.00 | 5.67  |      |       | 35.00 | 11.48 |      | 13.00 | 48 | 30 | 43 |
| 14.00 | 7.40  | 1.89 | 51.00 | 25.00 | 4.37  | 12.0 | 36.00 | 61 | 55 | 63 |

| <b>ss<sub>a</sub>(NAB)</b> |    | <b>bvmt</b> | <b>cf</b> | <b>eit</b> | <b>cptd</b> | <b>ds</b> |
|----------------------------|----|-------------|-----------|------------|-------------|-----------|
| 38                         | 48 | 43          | 49        | 23         | 26          | 36        |
| 59                         | 30 | 39          | 44        | 44         | 33          | 46        |
| 35                         | 38 | 47          | 55        | 34         | 33          | 36        |
| 19                         | 38 | 28          | 49        | 27         |             | 24        |
| 43                         | 51 | 59          | 60        | 54         | 34          | 42        |
| 30                         | 43 | 48          | 51        | 49         | 23          | 34        |
| 35                         | 48 | 47          | 51        | 45         | 52          | 52        |
| 57                         | 59 | 36          | 63        | 53         | 44          | 32        |
| 48                         | 60 | 56          | 38        | 48         | 35          | 50        |
| 43                         | 38 | 55          | 54        | 49         | 39          | 36        |
| 30                         | 34 | 29          | 36        | 51         | 24          | 44        |
| 57                         | 41 | 45          | 49        | 36         | 40          | 54        |
| 48                         | 64 | 56          | 49        | 62         | 59          | 58        |
| 48                         | 38 | 34          | 51        | 21         | 47          | 42        |
| 54                         | 57 | 47          | 55        | 57         | 41          | 48        |
| 32                         | 41 | 47          | 57        | 53         | 30          | 42        |
| 67                         | 62 | 63          | 52        | 49         | 53          | 60        |
| 24                         | 43 | 47          | 44        | 48         | 34          | 36        |
| 59                         | 59 | 60          | 49        | 35         | 39          | 60        |
| 27                         | 30 | 32          | 18        | 59         |             | 30        |
| 32                         | 46 | 42          | 46        | 62         | 27          | 40        |
| 46                         | 63 | 43          | 51        | 65         | 42          | 40        |
| 54                         | 59 | 54          | 55        | 40         | 37          | 38        |
| 57                         | 46 | 57          | 52        | 51         | 56          | 46        |
| 40                         | 66 | 59          | 52        | 45         | 34          | 30        |
| 34                         | 56 | 51          | 66        | 57         | 55          | 52        |
| 46                         | 54 | 50          | 51        | 51         | 48          | 44        |
| 48                         | 43 | 60          | 75        | 44         | 36          | 38        |
| 27                         | 24 | 29          | 39        | 51         | 25          | 18        |
| 32                         | 51 | 42          | 44        | 51         | 41          | 48        |
| 40                         | 41 | 29          | 34        | 39         | 42          | 44        |
| 51                         | 64 | 37          | 46        | 32         | 42          | 58        |



|    |    |    |    |    |    |    |
|----|----|----|----|----|----|----|
| 67 | 61 | 61 | 75 | 64 | 58 | 56 |
| 48 | 17 | 34 | 38 | 27 |    | 44 |
| 65 | 65 | 60 | 60 | 66 | 46 | 48 |
| 19 | 48 | 56 | 60 | 40 | 35 | 44 |
| 46 | 41 | 45 | 54 | 57 |    | 46 |

|    |    |    |    |    |    |    |
|----|----|----|----|----|----|----|
| 65 | 62 | 63 | 54 | 52 | 55 | 60 |
| 46 | 62 | 66 | 63 | 61 | 71 | 58 |
| 51 | 62 | 63 | 72 | 56 | 42 | 52 |
| 43 | 58 | 39 | 49 | 65 | 38 | 36 |
| 57 | 61 | 60 | 68 | 67 | 56 | 60 |

|    |    |    |    |    |    |    |
|----|----|----|----|----|----|----|
| 51 | 64 | 60 | 57 | 66 | 62 | 58 |
| 62 | 64 | 66 | 62 | 62 | 63 | 60 |
| 43 | 43 | 59 | 42 | 39 | 32 | 40 |
| 54 | 51 | 56 | 49 | 62 | 50 | 56 |
| 38 | 62 | 43 | 59 | 52 | 48 | 52 |
| 65 | 59 | 60 | 49 | 66 | 66 | 56 |
| 54 | 49 | 50 | 54 | 44 | 45 | 48 |
| 35 | 30 | 50 | 54 | 38 | 18 | 16 |
| 35 | 43 | 63 | 49 | 62 | 53 | 56 |

|    |    |    |    |    |    |    |
|----|----|----|----|----|----|----|
| 19 | 38 | 38 | 46 | 33 | 40 | 32 |
|----|----|----|----|----|----|----|

|    |    |    |    |    |    |    |
|----|----|----|----|----|----|----|
| 51 | 66 | 64 | 75 | 54 | 65 | 64 |
|----|----|----|----|----|----|----|

|    |    |    |    |    |    |    |
|----|----|----|----|----|----|----|
| 62 | 47 | 55 | 55 | 65 | 43 | 62 |
| 57 | 51 | 48 | 54 | 39 | 38 | 50 |

|    |    |    |    |    |    |    |
|----|----|----|----|----|----|----|
| 48 | 34 | 42 | 57 | 57 | 43 | 46 |
|----|----|----|----|----|----|----|

|    |    |    |    |    |    |    |
|----|----|----|----|----|----|----|
| 32 | 38 | 43 | 60 | 27 | 38 | 56 |
| 62 | 66 | 64 | 59 | 50 | 64 | 56 |

|    |    |    |    |    |    |    |
|----|----|----|----|----|----|----|
| 59 | 65 | 57 | 68 | 33 | 54 | 60 |
| 52 | 49 | 63 | 34 | 33 | 49 | 60 |

|    |    |    |    |    |    |    |
|----|----|----|----|----|----|----|
| 30 | 38 | 41 | 67 | 48 | 34 | 44 |
|----|----|----|----|----|----|----|

|    |    |    |    |    |    |    |
|----|----|----|----|----|----|----|
| 38 | 56 | 58 | 62 | 59 | 60 | 65 |
|----|----|----|----|----|----|----|

---

|    |    |    |    |    |    |    |
|----|----|----|----|----|----|----|
| 49 | 52 | 54 | 49 | 42 | 56 | 66 |
|----|----|----|----|----|----|----|

|    |    |    |    |    |    |    |
|----|----|----|----|----|----|----|
| 42 | 37 | 57 | 33 | 41 | 35 | 28 |
|----|----|----|----|----|----|----|

|    |    |    |    |    |    |    |
|----|----|----|----|----|----|----|
| 60 | 40 | 57 | 60 | 59 | 50 | 54 |
|----|----|----|----|----|----|----|

|    |    |    |    |    |    |    |
|----|----|----|----|----|----|----|
| 34 | 52 | 47 | 43 | 58 | 44 | 38 |
|----|----|----|----|----|----|----|

|    |    |    |    |    |    |    |
|----|----|----|----|----|----|----|
| 54 | 40 | 50 | 39 | 52 | 49 | 66 |
|----|----|----|----|----|----|----|

|    |    |    |    |    |    |    |
|----|----|----|----|----|----|----|
| 57 | 60 | 35 | 40 | 27 | 39 | 48 |
|----|----|----|----|----|----|----|

|    |    |    |    |    |    |    |
|----|----|----|----|----|----|----|
| 47 | 51 | 58 | 57 | 51 | 40 | 42 |
|----|----|----|----|----|----|----|

|    |    |    |    |    |    |    |
|----|----|----|----|----|----|----|
| 47 | 40 | 31 | 73 | 60 | 47 | 50 |
|----|----|----|----|----|----|----|

|    |    |    |    |    |    |    |
|----|----|----|----|----|----|----|
| 52 | 49 | 55 | 45 | 50 | 56 | 56 |
|----|----|----|----|----|----|----|

|    |    |    |    |    |    |    |
|----|----|----|----|----|----|----|
| 37 | 26 | 33 | 36 | 41 | 52 | 66 |
|----|----|----|----|----|----|----|

|    |    |    |    |    |    |    |
|----|----|----|----|----|----|----|
| 19 | 47 | 29 | 53 | 43 | 26 | 36 |
|----|----|----|----|----|----|----|

|    |    |    |    |    |    |    |
|----|----|----|----|----|----|----|
| 47 | 57 | 39 | 46 | 41 | 29 | 34 |
|----|----|----|----|----|----|----|

|    |    |    |    |    |    |    |
|----|----|----|----|----|----|----|
| 44 | 37 | 40 | 37 | 50 | 42 | 54 |
|----|----|----|----|----|----|----|

|    |    |    |    |    |    |    |
|----|----|----|----|----|----|----|
| 70 | 57 | 54 | 60 | 71 | 63 | 60 |
|----|----|----|----|----|----|----|

|    |    |    |    |    |    |    |
|----|----|----|----|----|----|----|
| 39 | 45 | 53 | 46 | 41 | 49 | 44 |
|----|----|----|----|----|----|----|

|    |    |    |    |    |    |    |
|----|----|----|----|----|----|----|
| 60 | 61 | 54 | 62 | 71 | 70 | 66 |
|----|----|----|----|----|----|----|

|    |    |    |    |    |    |    |
|----|----|----|----|----|----|----|
| 67 | 60 | 53 | 50 | 53 | 59 | 54 |
|----|----|----|----|----|----|----|

|    |    |    |    |    |    |    |
|----|----|----|----|----|----|----|
| 57 | 43 | 47 | 43 | 74 | 53 | 64 |
|----|----|----|----|----|----|----|

|    |    |    |    |    |    |    |
|----|----|----|----|----|----|----|
| 57 | 63 | 53 | 55 | 55 | 43 | 56 |
|----|----|----|----|----|----|----|

|    |    |    |    |    |    |    |
|----|----|----|----|----|----|----|
| 60 | 51 | 44 | 56 | 48 | 59 | 68 |
|----|----|----|----|----|----|----|

|    |    |    |    |    |    |    |
|----|----|----|----|----|----|----|
| 47 | 47 | 36 | 55 | 45 | 34 | 40 |
|----|----|----|----|----|----|----|

|    |    |    |    |    |    |    |
|----|----|----|----|----|----|----|
| 31 | 32 | 33 | 32 | 37 | 48 | 64 |
|----|----|----|----|----|----|----|

|    |    |    |    |    |    |    |
|----|----|----|----|----|----|----|
| 54 | 65 | 58 | 45 | 48 | 51 | 50 |
|----|----|----|----|----|----|----|

|    |    |    |    |    |    |    |
|----|----|----|----|----|----|----|
| 62 | 53 | 54 | 50 | 53 | 41 | 64 |
|----|----|----|----|----|----|----|

|    |    |    |    |    |    |    |
|----|----|----|----|----|----|----|
| 52 | 52 | 51 | 56 | 59 | 66 | 64 |
|----|----|----|----|----|----|----|

|    |    |    |    |    |    |    |
|----|----|----|----|----|----|----|
| 49 | 49 | 31 | 55 | 62 | 52 | 60 |
|----|----|----|----|----|----|----|

|    |    |    |    |    |    |    |
|----|----|----|----|----|----|----|
| 62 | 60 | 50 | 57 | 48 | 44 | 46 |
|----|----|----|----|----|----|----|

|    |    |    |    |    |    |    |
|----|----|----|----|----|----|----|
| 62 | 51 | 47 | 57 | 51 | 46 | 62 |
|----|----|----|----|----|----|----|

|    |    |    |    |    |    |    |
|----|----|----|----|----|----|----|
| 67 | 66 | 61 | 62 | 52 | 70 | 68 |
|----|----|----|----|----|----|----|

|    |    |    |    |    |    |    |
|----|----|----|----|----|----|----|
| 31 | 45 | 51 | 49 | 43 | 51 | 46 |
|----|----|----|----|----|----|----|

|    |    |    |    |    |    |    |
|----|----|----|----|----|----|----|
| 47 | 26 | 35 | 40 | 60 | 38 | 48 |
| 62 | 62 | 43 | 60 | 56 | 57 | 62 |
| 70 | 59 | 64 | 62 | 59 | 53 | 64 |
| 62 | 51 | 55 | 67 | 67 | 40 | 62 |
| 57 | 45 | 57 | 50 | 45 | 49 | 58 |
| 57 | 61 | 46 | 50 | 50 | 49 | 56 |
| 52 | 59 | 53 | 55 | 40 | 52 | 58 |
| 62 | 49 | 43 | 46 | 61 | 45 | 54 |
| 44 | 43 | 46 | 53 | 73 | 44 | 54 |
| 34 | 45 | 26 | 47 | 50 | 37 | 42 |
| 54 | 40 | 50 | 53 | 59 | 47 | 60 |
| 42 | 57 | 57 | 50 | 65 | 56 | 60 |
| 67 | 63 | 64 | 59 | 74 | 61 | 64 |
| 57 | 51 | 42 | 59 | 62 | 50 | 44 |
| 60 | 52 | 57 | 56 | 38 |    | 52 |
| 65 | 61 | 47 | 56 | 41 | 41 | 56 |
| 24 | 37 | 40 | 40 | 34 | 32 | 46 |
| 47 | 49 | 50 | 43 | 51 | 51 | 56 |
| 47 | 40 | 31 | 52 | 49 | 38 | 36 |
| 49 | 52 | 61 | 63 | 70 | 56 | 50 |
| 57 | 40 | 59 | 59 | 62 | 55 | 56 |
| 65 | 52 | 57 | 53 | 55 | 58 | 62 |
| 47 | 56 | 43 | 52 | 63 | 33 | 42 |
| 49 | 45 | 57 | 57 | 70 | 44 | 60 |
| 31 | 32 | 50 | 57 | 39 | 29 | 40 |
| 24 | 32 | 35 | 37 | 29 | 24 | 28 |
| 54 | 47 | 55 | 52 | 41 | 34 | 40 |
| 31 | 45 | 29 | 43 |    | 31 | 31 |
| 55 | 53 | 55 | 75 | 64 | 38 | 56 |

|    |    |    |    |    |    |    |
|----|----|----|----|----|----|----|
| 61 | 41 | 57 | 61 | 67 | 68 | 62 |
| 73 | 51 | 63 | 66 | 61 | 52 | 56 |
| 10 | 45 | 39 | 41 | 55 | 37 | 50 |
| 58 | 60 | 59 | 52 | 78 | 65 | 68 |
| 49 | 60 | 60 | 59 | 38 | 55 | 54 |
| 46 | 71 | 66 | 75 | 80 | 73 | 72 |
| 43 | 29 | 35 | 50 | 45 | 35 | 46 |
| 51 | 49 | 50 | 45 | 33 |    | 42 |
| 41 | 39 | 54 | 40 | 44 | 53 | 58 |

**J Mode T Sub**

90

96

86

78

100

90

90

96

96

82

70

96

96

82

100

92

100

90

108

32

82

88

96

96

104

44

90

96

56

82

78

100

82  
104  
96  
86

104  
86  
104

96  
86

100

108  
58  
104

92

90  
100

92

82

100

96

104

---

92

74

96

78

82

86

96

96

96

86

58

70

78

82

96

100

86

100

96

86

100

96

92

78

86  
100

100  
104  
92  
100  
92  
96  
92

96

100

100  
74  
96  
88

104  
104

108  
96

108  
68  
70

96

36  
104



100

108

70

104

70

54

100

| number | eduyear | gender | marry     | date of birth | age | educational    | st speak | mannation | gender |
|--------|---------|--------|-----------|---------------|-----|----------------|----------|-----------|--------|
| 1      | 12      | male   | remarried | 30-Sep-1950   | 57  | high school    | Yes      | Han       | 1.00   |
| 2      | 12      | male   | unmarried | 20-Apr-1957   | 50  | high school    | Yes      | Han       | 1.00   |
| 3      | 16      | female | married   | 11-Oct-1960   | 47  | Undergraduate  | Yes      | Han       | 4.00   |
| 4      | 16      | male   | divorced  | 14-Aug-1970   | 37  | Undergraduate  | Yes      | Han       | 1.00   |
| 5      | 15      | male   | divorced  | 01-Sep-1960   | 47  | junior college | Yes      | Han       | 1.00   |
| 6      | 15      | male   | unmarried | 21-Dec-1972   | 35  | junior college | Yes      | Han       | 1.00   |
| 7      | 12      | male   | divorced  | 05-Feb-1958   | 49  | high school    | Yes      | Han       | 1.00   |
| 8      | 9       | male   | unmarried | 27-Aug-1966   | 41  | middle school  | Yes      | Han       | 1.00   |
| 9      | 9       | male   | unmarried | 06-Sep-1959   | 48  | middle school  | Yes      | Han       | 1.00   |
| 10     | 16      | female | unmarried | 24-Nov-1956   | 51  | Undergraduate  | Yes      | Han       | 4.00   |
| 11     | 12      | male   | unmarried | 29-Aug-1968   | 39  | high school    | Yes      | Han       | 1.00   |
| 12     | 9       | male   | married   | 25-Feb-1947   | 60  | middle school  | Yes      | Han       | 1.00   |
| 13     | 9       | male   | married   | 04-Feb-1950   | 57  | middle school  | Yes      | Han       | 1.00   |
| 14     | 9       | male   | married   | 24-Apr-1952   | 55  | middle school  | Yes      | Han       | 1.00   |
| 15     | 12      | female | unmarried | 08-Oct-1987   | 20  | high school    | Yes      | Han       | 4.00   |
| 16     | 12      | female | divorced  | 27-Nov-1954   | 53  | high school    | Yes      | Han       | 4.00   |
| 17     | 15      | female | unmarried | 07-Jan-1963   | 44  | junior college | Yes      | Han       | 4.00   |
| 18     | 12      | female | unmarried | 18-Jan-1961   | 46  | high school    | Yes      | Han       | 4.00   |
| 19     | 9       | female | married   | 03-Jun-1951   | 56  | middle school  | Yes      | Han       | 4.00   |
| 20     | 16      | female | married   | 25-Jan-1962   | 45  | Undergraduate  | Yes      | Han       | 4.00   |
| 21     | 15      | female | unmarried | 29-Mar-1969   | 38  | junior college | Yes      | Han       | 4.00   |
| 22     | 9       | female | married   | 07-Aug-1952   | 55  | middle school  | Yes      | Han       | 4.00   |
| 23     | 15      | female | divorced  | 14-Oct-1961   | 46  | junior college | Yes      | Han       | 4.00   |
| 24     | 12      | female | married   | 23-May-1962   | 45  | high school    | Yes      | Han       | 4.00   |
| 25     | 12      | female | unmarried | 09-May-1951   | 56  | high school    | Yes      | Han       | 4.00   |
| 26     | 12      | male   | unmarried | 07-Dec-1958   | 49  | high school    | Yes      | Han       | 1.00   |
| 27     | 12      | female | unmarried | 15-Aug-1971   | 36  | high school    | Yes      | Han       | 4.00   |
| 28     | 12      | male   | unmarried | 24-Dec-1958   | 49  | high school    | Yes      | Han       | 1.00   |
| 29     | 12      | male   | married   | 09-Apr-1960   | 47  | high school    | Yes      | Han       | 1.00   |
| 30     | 12      | male   | unmarried | 16-Dec-1970   | 37  | high school    | Yes      | Han       | 1.00   |
| 31     | 12      | male   | unmarried | 10-Jul-1965   | 42  | high school    | Yes      | Han       | 1.00   |
| 32     | 12      | male   | unmarried | 01-Apr-1965   | 42  | high school    | Yes      | Han       | 1.00   |
| 33     | 12      | male   | unmarried | 23-Nov-1960   | 47  | high school    | Yes      | Han       | 1.00   |
| 34     | 15      | male   | married   | 13-Feb-1958   | 49  | junior college | Yes      | Han       | 1.00   |
| 35     | 12      | male   | unmarried | 17-Apr-1946   | 61  | high school    | Yes      | Han       | 1.00   |
| 36     | 12      | male   | unmarried | 21-Aug-1951   | 56  | high school    | Yes      | Han       | 1.00   |
| 37     | 9       | male   | unmarried | 16-Dec-1961   | 46  | middle school  | Yes      | Han       | 1.00   |
| 38     | 9       | male   | unmarried | 19-Jul-1949   | 58  | middle school  | Yes      | Han       | 1.00   |
| 39     | 6       | male   | divorced  | 01-Apr-1954   | 53  | primary school | Yes      | Han       | 1.00   |
| 40     | 12      | male   | unmarried | 30-May-1947   | 60  | high school    | Yes      | Han       | 1.00   |
| 41     | 6       | male   | unmarried | 17-Aug-1960   | 47  | primary school | Yes      | Han       | 1.00   |
| 42     | 12      | male   | unmarried | 05-Aug-1961   | 46  | high school    | Yes      | Han       | 1.00   |
| 43     | 9       | male   | divorced  | 03-Apr-1953   | 54  | middle school  | Yes      | Han       | 1.00   |
| 44     | 9       | male   | unmarried | 20-Mar-1955   | 52  | middle school  | Yes      | Han       | 1.00   |
| 45     | 12      | male   | unmarried | 26-Jun-1957   | 50  | high school    | Yes      | Han       | 1.00   |
| 46     | 9       | male   | unmarried | 24-Oct-1954   | 53  | middle school  | Yes      | Han       | 1.00   |
| 47     | 9       | male   | unmarried | 14-Oct-1955   | 52  | middle school  | Yes      | Han       | 1.00   |
| 48     | 12      | male   | divorced  | 21-Oct-1957   | 50  | high school    | Yes      | Han       | 1.00   |
| 49     | 12      | male   | married   | 06-Jul-1959   | 48  | high school    | Yes      | Han       | 1.00   |
| 50     | 6       | female | unmarried | 01-Jan-1950   | 57  | primary school | Yes      | Han       | 4.00   |
| 51     | 12      | female | married   | 13-Nov-1957   | 50  | high school    | Yes      | Han       | 4.00   |
| 52     | 12      | male   | unmarried | 12-Apr-1967   | 40  | high school    | Yes      | Han       | 1.00   |
| 53     | 15      | male   | unmarried | 19-Jan-1985   | 22  | junior college | Yes      | Han       | 1.00   |
| 54     | 12      | female | unmarried | 12-Mar-1959   | 48  | high school    | Yes      | Han       | 4.00   |
| 55     | 12      | male   | divorced  | 16-May-1964   | 43  | high school    | Yes      | Han       | 1.00   |
| 56     | 9       | male   | married   | 24-Jul-1964   | 43  | middle school  | Yes      | Han       | 1.00   |
| 57     | 9       | male   | unmarried | 05-Apr-1976   | 31  | middle school  | Yes      | Han       | 1.00   |
| 58     | 16      | female | unmarried | 27-Apr-1973   | 34  | Undergraduate  | Yes      | Han       | 4.00   |
| 59     | 12      | female | unmarried | 01-Jul-1952   | 55  | high school    | Yes      | Han       | 4.00   |
| 60     | 12      | female | married   | 01-Jul-1959   | 48  | high school    | 否        | Han       | 4.00   |
| 61     | 12      | male   | unmarried | 25-Apr-1958   | 49  | high school    | Yes      | Han       | 1.00   |

|     |           |           |             |                   |       |     |      |      |
|-----|-----------|-----------|-------------|-------------------|-------|-----|------|------|
| 62  | 12 male   | unmarried | 13-Jan-1961 | 46 high school    | Yes   | Han | 1.00 |      |
| 63  | 16 male   | married   | 01-Feb-1964 | 43 Undergraduate  | Yes   | Han | 1.00 |      |
| 64  | 16 male   | divorced  | 20-Jan-1963 | 44 Undergraduate  | Yes   | Han | 1.00 |      |
| 65  | 12 male   | unmarried | 23-Mar-1986 | 21 high school    | Yes   | Han | 1.00 |      |
| 66  | 9 male    | unmarried | 27-Nov-1950 | 57 middle school  | Yes   | Han | 1.00 |      |
| 67  | 9 male    | divorced  | 23-Jun-1966 | 41 middle school  | Yes   | Han | 1.00 |      |
| 68  | 9 female  | unmarried | 18-Jan-1950 | 57 middle school  | Yes   | Han | 4.00 |      |
| 69  | 9 female  | married   | 05-Aug-1955 | 52 middle school  | Yes   | Han | 4.00 |      |
| 70  | 12 female | unmarried | 01-Oct-1954 | 53 high school    | Yes   | Han | 4.00 |      |
| 71  | 12 female | unmarried | 26-Aug-1970 | 37 high school    | Yes   | Han | 4.00 |      |
| 72  | 9 female  | divorced  | 27-Feb-1957 | 50 middle school  | Yes   | Han | 4.00 |      |
| 73  | 12 female | unmarried | 04-Mar-1962 | 45 high school    | Yes   | Han | 4.00 |      |
| 74  | 16 female | married   | 15-Sep-1962 | 45 Undergraduate  | Yes   | Han | 4.00 |      |
| 75  | 6 female  | unmarried | 19-Oct-1966 | 41 primary school | Yes   | Han | 4.00 |      |
| 76  | 16 female | unmarried | 31-Jan-1963 | 44 Undergraduate  | Yes   | Han | 4.00 |      |
| 77  | 12 female | divorced  | 11-Nov-1955 | 52 high school    | Yes   | Han | 4.00 |      |
| 78  | 9 male    | unmarried | 30-Sep-1952 | 55 middle school  | Yes   | Han | 1.00 |      |
| 79  | 12 male   | married   | 31-Jan-1970 | 37 high school    | Yes   | Han | 1.00 |      |
| 80  | 12 male   | unmarried | 23-Mar-1964 | 43 high school    | Yes   | Han | 1.00 |      |
| 81  | 9 male    | unmarried | 07-Aug-1956 | 51 middle school  | Yes   | Han | 1.00 |      |
| 82  | 9 male    | unmarried | 12-May-1961 | 46 middle school  | Yes   | Han | 1.00 |      |
| 83  | 9 male    | unmarried | 28-Apr-1963 | 44 middle school  | Yes   | Han | 1.00 |      |
| 84  | 12 male   | unmarried | 29-May-1961 | 46 high school    | Yes   | Han | 1.00 |      |
| 85  | 12 male   | divorced  | 10-Oct-1947 | 60 high school    | Yes   | Han | 1.00 |      |
| 86  | 9 female  | unmarried | 05-Nov-1963 | 44 middle school  | Yes   | Han | 4.00 |      |
| 87  | 12 female | unmarried | 06-Aug-1963 | 44 high school    | Yes   | Han | 4.00 |      |
| 88  | #NULL!    | female    | unmarried   | 09-Jul-1978       | 29 硕士 | Yes | Han  | 4.00 |
| 89  | 15 female | unmarried | 06-Jul-1971 | 36 junior college | Yes   | Han | 4.00 |      |
| 90  | 15 female | divorced  | 03-Apr-1961 | 46 junior college | Yes   | Han | 4.00 |      |
| 91  | 9 male    | married   | 18-Jul-1950 | 57 middle school  |       |     | 1.00 |      |
| 92  | 12 male   | unmarried | 04-Feb-1949 | 58 high school    |       |     | 1.00 |      |
| 93  | 12 male   | unmarried | 04-May-1981 | 26 high school    |       |     | 1.00 |      |
| 94  | 12 male   | married   | 19-Jan-1969 | 38 high school    |       |     | 1.00 |      |
| 95  | 12 male   | unmarried | 25-May-1958 | 49 high school    |       |     | 1.00 |      |
| 96  | #NULL!    | male      | unmarried   | 01-Mar-1964       | 43 硕士 |     | 1.00 |      |
| 97  | 12 male   | divorced  | 23-Mar-1947 | 60 high school    |       |     | 1.00 |      |
| 98  | 16 female | unmarried | 20-Nov-1985 | 22 Undergraduate  |       |     | 4.00 |      |
| 99  | 16 female | unmarried | 01-Aug-1982 | 25 Undergraduate  |       |     | 4.00 |      |
| 100 | 16 female | unmarried | 01-Jun-1948 | 59 Undergraduate  |       |     | 4.00 |      |
| 101 | 9 female  | unmarried | 12-Dec-1963 | 44 middle school  |       |     | 4.00 |      |
| 102 | 16 female | unmarried | 27-Oct-1964 | 43 Undergraduate  |       |     | 4.00 |      |
| 103 | 12 female | unmarried | 20-Sep-1960 | 47 high school    |       |     | 4.00 |      |
| 104 | 12 female | unmarried | 21-Mar-1965 | 42 high school    |       |     | 4.00 |      |
| 105 | 9 female  | married   | 07-Jan-1960 | 47 middle school  |       |     | 4.00 |      |
| 106 | 9 female  | married   | 15-Nov-1948 | 59 middle school  |       |     | 4.00 |      |
| 107 | 12 female | married   | 20-Jul-1964 | 43 high school    |       |     | 4.00 |      |
| 108 | 9 male    | unmarried | 04-Nov-1955 | 52 middle school  |       |     | 1.00 |      |
| 109 | 12 female | unmarried | 13-Nov-1970 | 37 high school    |       |     | 4.00 |      |
| 110 | 16 female | unmarried | 26-Nov-1953 | 54 Undergraduate  |       |     | 4.00 |      |
| 111 | 15 female | unmarried | 11-May-1971 | 36 junior college |       |     | 4.00 |      |
| 112 | 6 male    | unmarried | 20-Sep-1954 | 53 primary school |       |     | 1.00 |      |
| 113 | 9 male    | unmarried | 07-Aug-1946 | 61 middle school  |       |     | 1.00 |      |
| 114 | 6 male    | unmarried | 01-Jul-1956 | 51 primary school |       |     | 1.00 |      |
| 115 | 9 male    | unmarried | 19-Nov-1948 | 59 middle school  |       |     | 1.00 |      |
| 116 | 9 male    | unmarried | 23-Aug-1954 | 53 middle school  |       |     | 1.00 |      |
| 117 | 9 male    | unmarried | 21-Jan-1951 | 56 middle school  |       |     | 1.00 |      |
| 118 | 9 male    | unmarried | 14-Mar-1956 | 51 middle school  |       |     | 1.00 |      |
| 119 | 12 male   | divorced  | 04-Jun-1954 | 53 high school    |       |     | 1.00 |      |
| 120 | 9 male    | unmarried | 23-Oct-1968 | 39 middle school  |       |     | 1.00 |      |
| 121 | 9 female  | unmarried | 27-Oct-1949 | 58 middle school  |       |     | 4.00 |      |
| 122 | 9 female  | married   | 07-Aug-1954 | 53 middle school  |       |     | 4.00 |      |
| 123 | 9 female  | divorced  | 01-May-1955 | 52 middle school  |       |     | 4.00 |      |

|     |           |           |             |                   |       |      |
|-----|-----------|-----------|-------------|-------------------|-------|------|
| 124 | 9 female  | unmarried | 21-Jul-1950 | 57 middle school  | 4.00  |      |
| 125 | 12 female | unmarried | 08-Jun-1960 | 47 high school    | 4.00  |      |
| 126 | 12 female | unmarried | 09-Dec-1961 | 46 high school    | 4.00  |      |
| 127 | 6 female  | married   | 13-Sep-1953 | 54 primary school | 4.00  |      |
| 128 | 16 female | unmarried | 16-Aug-1964 | 43 Undergraduate  | 4.00  |      |
| 129 | 12 female | unmarried | 09-Dec-1958 | 49 high school    | 4.00  |      |
| 130 | 9 female  | divorced  | 19-Dec-1963 | 44 middle school  | 4.00  |      |
| 131 | 12 female | unmarried | 13-Mar-1973 | 34 high school    | 4.00  |      |
| 132 | 9 female  | divorced  | 03-Dec-1963 | 44 middle school  | 4.00  |      |
| 133 | 16 female | unmarried | 31-Jul-1961 | 46 Undergraduate  | 4.00  |      |
| 134 | 12 male   | divorced  | 06-Jun-1957 | 50 high school    | 1.00  |      |
| 135 | 12 male   | unmarried | 15-Jan-1958 | 49 high school    | 1.00  |      |
| 136 | 12 male   | unmarried | 01-Jun-1957 | 50 high school    | 1.00  |      |
| 137 | 9 male    | unmarried | 23-Aug-1961 | 46 middle school  | 1.00  |      |
| 138 | 12 male   | unmarried | 16-Apr-1959 | 48 high school    | 1.00  |      |
| 139 | 9 male    | married   | 08-Aug-1949 | 58 middle school  | 1.00  |      |
| 140 | 12 male   | unmarried | 06-Jan-1968 | 39 high school    | 1.00  |      |
| 141 | 9 male    | unmarried | 23-Jul-1953 | 54 middle school  | 1.00  |      |
| 142 | 9 male    | married   | 16-Mar-1948 | 59 middle school  | 1.00  |      |
| 143 | 9 male    | unmarried | 01-Aug-1969 | 38 middle school  | 1.00  |      |
| 144 | 9 male    | unmarried | 10-Jan-1950 | 57 middle school  | 1.00  |      |
| 145 | 12 male   | unmarried | 01-Jan-1952 | 55 high school    | 1.00  |      |
| 146 | 9 male    | divorced  | 15-Oct-1955 | 52 middle school  | 1.00  |      |
| 147 | 12 male   | married   | 19-Sep-1963 | 44 high school    | 1.00  |      |
| 148 | 9 male    | unmarried | 25-Dec-1952 | 55 middle school  | 1.00  |      |
| 149 | 12 female | divorced  | 01-Apr-1963 | 44 high school    | 4.00  |      |
| 150 | 12 female | unmarried | 23-Feb-1963 | 44 high school    | 4.00  |      |
| 151 | 12 female | divorced  | 13-Oct-1952 | 55 high school    | 4.00  |      |
| 152 | 12 female | unmarried | 27-Jan-1958 | 49 high school    | 4.00  |      |
| 153 | 12 female | divorced  | 01-Jan-1957 | 50 high school    | 4.00  |      |
| 154 | 9 female  | married   | 24-Nov-1954 | 53 middle school  | 4.00  |      |
| 155 | 12 female | married   | 01-Dec-1959 | 48 high school    | 4.00  |      |
| 156 | 15 female | unmarried | 21-Nov-1955 | 52 junior college | 4.00  |      |
| 157 | 12 female | divorced  | 19-Jan-1958 | 49 high school    | 4.00  |      |
| 158 | 12 female | unmarried | 31-Jul-1961 | 46 high school    | 4.00  |      |
| 159 | 12 female | married   | 05-Dec-1958 | 49 high school    | 4.00  |      |
| 160 | 9 female  | unmarried | 03-May-1952 | 55 middle school  | 4.00  |      |
| 161 | 12 female | unmarried | 31-May-1957 | 50 high school    | 4.00  |      |
| 162 | 15 male   | unmarried | 01-Sep-1962 | 45 junior college | 1.00  |      |
| 163 | 12 male   | unmarried | 22-May-1987 | 20 high school    | 1.00  |      |
| 164 | 12 male   | unmarried | 28-Feb-1949 | 58 high school    | 1.00  |      |
| 165 | #NULL!    | male      | married     | 24-Mar-1967       | 40 硕士 | 1.00 |
| 166 | 9 male    | unmarried | 03-May-1951 | 56 middle school  | 1.00  |      |
| 167 | 16 female | divorced  | 25-Jun-1961 | 46 Undergraduate  | 4.00  |      |
| 168 | 12 female | unmarried | 23-Mar-1959 | 48 high school    | 4.00  |      |
| 169 | 16 female | unmarried | 01-Oct-1963 | 44 Undergraduate  | 4.00  |      |
| 170 | 9 female  | married   | 12-Nov-1968 | 39 middle school  | 4.00  |      |
| 171 | 12 female | unmarried | 17-Jul-1962 | 45 high school    | 4.00  |      |
| 172 | 9 female  | unmarried | 15-Jun-1952 | 55 middle school  | 4.00  |      |
| 173 | 16 female | married   | 25-May-1971 | 36 Undergraduate  | 4.00  |      |
| 174 | 9 male    | unmarried | 18-Jul-1950 | 57 middle school  | 1.00  |      |
| 175 | 9 male    | married   | 05-May-1967 | 40 middle school  | 1.00  |      |
| 176 | 12 male   | unmarried | 31-Oct-1962 | 45 high school    | 1.00  |      |
| 177 | 9 male    | unmarried | 17-Aug-1956 | 51 middle school  | 1.00  |      |
| 178 | 12 male   | unmarried | 15-Sep-1967 | 40 high school    | 1.00  |      |
| 179 | 9 male    | married   | 12-Sep-1954 | 53 middle school  | 1.00  |      |
| 180 | 12 male   | unmarried | 23-Jun-1985 | 22 high school    | 1.00  |      |
| 181 | 12 male   | unmarried | 26-Oct-1979 | 28 high school    | 1.00  |      |
| 182 | 12 male   | unmarried | 01-Jun-1950 | 57 high school    | 1.00  |      |
| 183 | 9 male    | unmarried | 01-Jun-1950 | 57 middle school  | 1.00  |      |
| 184 | 9 male    | unmarried | 20-Mar-1950 | 57 middle school  | 1.00  |      |
| 185 | 12 male   | married   | 08-Feb-1958 | 49 high school    | 1.00  |      |

|     |           |           |             |                   |      |
|-----|-----------|-----------|-------------|-------------------|------|
| 186 | 12 male   | unmarried | 14-Nov-1968 | 39 high school    | 1.00 |
| 187 | 9 male    | unmarried | 13-Nov-1967 | 40 middle school  | 1.00 |
| 188 | 6 male    | married   | 03-Jul-1959 | 48 primary school | 1.00 |
| 189 | 15 male   | unmarried | 07-Jan-1972 | 35 junior college | 1.00 |
| 190 | 12 male   | divorced  | 21-Dec-1957 | 50 high school    | 1.00 |
| 191 | 12 male   | unmarried | 09-Mar-1973 | 34 high school    | 1.00 |
| 192 | 12 male   | unmarried | 01-Jan-1970 | 37 high school    | 1.00 |
| 193 | 16 male   | unmarried | 23-Oct-1965 | 42 Undergraduate  | 1.00 |
| 194 | 9 male    | divorced  | 03-Jun-1961 | 46 middle school  | 1.00 |
| 195 | 12 male   | unmarried | 02-Nov-1962 | 45 high school    | 1.00 |
| 196 | 6 male    | unmarried | 03-Jul-1955 | 52 primary school | 1.00 |
| 197 | 9 male    | unmarried | 26-Dec-1947 | 60 middle school  | 1.00 |
| 198 | 9 male    | unmarried | 17-Dec-1951 | 56 middle school  | 1.00 |
| 199 | 15 male   | unmarried | 28-Mar-1971 | 36 junior college | 1.00 |
| 200 | 12 female | divorced  | 11-Jan-1969 | 38 high school    | 4.00 |
| 201 | 12 female | unmarried | 28-Nov-1969 | 38 high school    | 4.00 |
| 202 | 12 female | married   | 18-Jul-1957 | 50 high school    | 4.00 |
| 203 | 16 female | divorced  | 26-Jun-1972 | 35 Undergraduate  | 4.00 |
| 204 | 15 female | unmarried | 22-Oct-1968 | 39 junior college | 4.00 |
| 205 | 9 female  | divorced  | 19-Jan-1954 | 53 middle school  | 4.00 |
| 206 | 12 female | divorced  | 29-Dec-1956 | 51 high school    | 4.00 |
| 207 | 12 female | divorced  | 12-Nov-1960 | 47 high school    | 4.00 |
| 208 | 12 female | unmarried | 13-May-1973 | 34 high school    | 4.00 |
| 209 | 9 female  | married   | 28-Oct-1951 | 56 middle school  | 4.00 |
| 210 | 12 female | divorced  | 12-Oct-1960 | 47 high school    | 4.00 |
| 211 | 12 female | married   | 05-Nov-1962 | 45 high school    | 4.00 |
| 212 | 16 female | married   | 11-Dec-1971 | 36 Undergraduate  | 4.00 |
| 213 | 12 female | divorced  | 11-Aug-1964 | 43 high school    | 4.00 |
| 214 | 9 female  | divorced  | 26-Mar-1949 | 58 middle school  | 4.00 |
| 215 | 12 female | married   | 08-Mar-1970 | 37 high school    | 4.00 |
| 216 | 9 male    | unmarried | 26-Jun-1966 | 41 middle school  | 1.00 |
| 217 | 9 male    | unmarried | 05-Oct-1959 | 48 middle school  | 1.00 |
| 218 | 9 male    | unmarried | 04-Jun-1958 | 49 middle school  | 1.00 |
| 219 | 9 male    | unmarried | 04-Jan-1955 | 52 middle school  | 1.00 |
| 220 | 9 male    | unmarried | 02-Jan-1952 | 55 middle school  | 1.00 |
| 221 | 12 male   | divorced  | 27-Sep-1960 | 47 high school    | 1.00 |
| 222 | 12 male   | unmarried | 07-Mar-1980 | 27 high school    | 1.00 |
| 223 | 9 male    | divorced  | 11-Feb-1952 | 55 middle school  | 1.00 |
| 224 | 12 male   | unmarried | 13-May-1951 | 56 high school    | 1.00 |
| 225 | 9 male    | divorced  | 21-Nov-1948 | 59 middle school  | 1.00 |
| 226 | 9 male    | married   | 17-Sep-1955 | 52 middle school  | 1.00 |
| 227 | 9 male    | unmarried | 20-Aug-1964 | 43 middle school  | 1.00 |
| 228 | 9 male    | unmarried | 01-Apr-1953 | 54 middle school  | 1.00 |
| 229 | 9 male    | unmarried | 01-Jan-1959 | 48 middle school  | 1.00 |
| 230 | 12 male   | unmarried | 05-Jul-1960 | 47 high school    | 1.00 |
| 231 | 9 male    | unmarried | 01-Feb-1964 | 43 middle school  | 1.00 |
| 232 | 12 male   | married   | 12-Dec-1951 | 56 high school    | 1.00 |
| 233 | 16 female | married   | 10-Oct-1968 | 39 Undergraduate  | 4.00 |
| 234 | 12 male   | unmarried | 02-Jul-1969 | 38 high school    | 1.00 |
| 235 | 9 male    | unmarried | 23-Dec-1951 | 56 middle school  | 1.00 |
| 236 | 12 male   | married   | 26-Feb-1958 | 49 high school    | 1.00 |
| 237 | 9 male    | married   | 28-Nov-1963 | 44 middle school  | 1.00 |
| 238 | 9 male    | unmarried | 29-Nov-1954 | 53 middle school  | 1.00 |
| 239 | 9 male    | unmarried | 20-Jun-1956 | 51 middle school  | 1.00 |
| 240 | 9 male    | unmarried | 25-Feb-1958 | 49 middle school  | 1.00 |
| 241 | 16 male   | unmarried | 26-Nov-1965 | 42 Undergraduate  | 1.00 |
| 242 | 16 male   | married   | 07-Mar-1951 | 56 Undergraduate  | 1.00 |
| 243 | 12 male   | unmarried | 05-Jan-1948 | 59 high school    | 1.00 |
| 244 | 16 male   | unmarried | 02-Oct-1952 | 55 Undergraduate  | 1.00 |
| 245 | 12 male   | unmarried | 16-Apr-1959 | 48 high school    | 1.00 |
| 246 | 12 male   | divorced  | 10-Feb-1961 | 46 high school    | 1.00 |
| 247 | 9 male    | divorced  | 23-Dec-1952 | 55 middle school  | 1.00 |

|     |         |           |             |                  |      |
|-----|---------|-----------|-------------|------------------|------|
| 248 | 9 male  | divorced  | 26-Jun-1953 | 54 middle school | 1.00 |
| 249 | 9 male  | unmarried | 06-Jan-1954 | 53 middle school | 1.00 |
| 250 | 12 male | unmarried | 11-Nov-1963 | 44 high school   | 1.00 |
| 251 | 12 male | unmarried | 29-Apr-1987 | 20 high school   | 1.00 |
| 252 | 9 male  | unmarried | 07-Mar-1960 | 47 middle school | 1.00 |
| 253 | 12 male | married   | 24-Sep-1958 | 49 high school   | 1.00 |
| 254 | 9 male  | unmarried | 26-Jun-1953 | 54 middle school | 1.00 |
| 255 | 12 male | unmarried | 16-Apr-1965 | 42 high school   | 1.00 |
| 256 | 12 male | unmarried | 05-Dec-1950 | 57 high school   | 1.00 |
| 257 | 12 male | unmarried | 27-Sep-1987 | 20 high school   | 1.00 |
| 258 | 12 male | unmarried | 28-Feb-1962 | 45 high school   | 1.00 |
| 259 | 12 male | divorced  | 16-Apr-1967 | 40 high school   | 1.00 |
| 260 | 12 male | married   | 07-Jun-1971 | 36 high school   | 1.00 |
| 261 | 12 male | divorced  | 13-Nov-1961 | 46 high school   | 1.00 |
| 262 | 12 male | unmarried | 26-Oct-1965 | 42 high school   | 1.00 |
| 263 | 16 male | unmarried | 13-Nov-1967 | 40 Undergraduate | 1.00 |
| 264 | 12 male | divorced  | 24-Apr-1962 | 45 high school   | 1.00 |
| 265 | 12 male | unmarried | 07-May-1971 | 36 high school   | 1.00 |
| 266 | 9 male  | unmarried | 29-Apr-1954 | 53 middle school | 1.00 |
| 267 | 12 male | unmarried | 26-Dec-1964 | 43 high school   | 1.00 |
| 268 | 12 male | unmarried | 25-Sep-1962 | 45 high school   | 1.00 |
| 269 | 9 male  | divorced  | 30-Apr-1968 | 39 middle school | 1.00 |
| 270 | 9 male  | married   | 27-Oct-1951 | 56 middle school | 1.00 |

| wcstb1 | wcsti1 | ep1    | upsa1  | TMT1 | SC1   | HVLT1 | SS1   | DS1   | NAB1  | maze1 |
|--------|--------|--------|--------|------|-------|-------|-------|-------|-------|-------|
| 1      | 31     | #NULL! | #NULL! | .25  | 40.00 | 18.00 | 7.00  | 20.00 | 7.00  | 2.08  |
| #NULL! | #NULL! | #NULL! | #NULL! | .23  | 30.00 | 13.00 | 12.00 | 18.00 | 10.00 | 2.40  |
| 1      | 39     | #NULL! | #NULL! | .25  | 40.00 | 21.00 | 10.00 | 13.00 | 3.00  | 1.39  |
| 0      | 60     | #NULL! | #NULL! | .22  | 40.00 | 16.00 | 19.00 | 25.00 | 7.00  | 2.08  |
| 2      | 30     | #NULL! | #NULL! | .25  | 46.00 | 22.00 | 12.00 | 22.00 | 11.00 | 2.48  |
| 2      | 25     | #NULL! | #NULL! | .23  | 34.00 | 20.00 | 19.00 | 22.00 | 5.00  | 1.79  |
| 2      | 48     | #NULL! | #NULL! | .23  | 17.00 | 13.00 | 16.00 | 8.00  | 2.00  | 1.10  |
| 1      | 74     | #NULL! | #NULL! | .22  | 26.00 | 17.00 | 10.00 | 17.00 | 7.00  | 2.08  |
| 0      | 22     | #NULL! | #NULL! | .23  | 21.00 | 17.00 | .00   | 16.00 | 2.00  | 1.10  |
| 0      | 56     | #NULL! | #NULL! | .26  | 41.00 | 26.00 | 15.00 | 19.00 | 6.00  | 1.95  |
| 6      | 4      | #NULL! | #NULL! | .25  | 37.00 | 24.00 | 6.00  | 22.00 | 5.00  | 1.79  |
| 1      | 41     | #NULL! | #NULL! | .22  | 19.00 | 7.00  | 10.00 | 15.00 | 1.00  | .69   |
| 1      | 38     | #NULL! | #NULL! | .25  | 32.00 | 16.00 | 12.00 | 16.00 | 6.00  | 1.95  |
| 0      | 10     | #NULL! | #NULL! | .21  | 29.00 | 10.00 | 11.00 | 21.00 | 5.00  | 1.79  |
| 6      | 20     | #NULL! | #NULL! | .24  | 44.00 | 19.00 | 11.00 | 16.00 | 5.00  | 1.79  |
| 0      | 44     | #NULL! | #NULL! | .24  | 34.00 | 19.00 | 7.00  | 5.00  | 4.00  | 1.61  |
| 0      | 58     | #NULL! | #NULL! | .25  | 57.00 | 24.00 | 13.00 | 14.00 | 5.00  | 1.79  |
| 6      | 25     | #NULL! | #NULL! | .22  | 33.00 | 21.00 | 16.00 | 14.00 | 4.00  | 1.61  |
| 0      | 16     | #NULL! | #NULL! | .23  | 26.00 | 18.00 | 9.00  | 17.00 | 3.00  | 1.39  |
| 2      | 26     | #NULL! | #NULL! | .26  | 45.00 | 29.00 | 13.00 | 17.00 | 20.00 | 3.04  |
| 0      | 21     | #NULL! | #NULL! | .22  | 45.00 | 18.00 | 12.00 | 15.00 | 3.00  | 1.39  |
| 1      | 12     | #NULL! | #NULL! | .25  | 35.00 | 6.00  | 13.00 | 13.00 | 3.00  | 1.39  |
| 4      | 25     | #NULL! | #NULL! | .25  | 54.00 | 22.00 | 11.00 | 17.00 | 2.00  | 1.10  |
| 1      | 36     | #NULL! | #NULL! | .26  | 36.00 | 21.00 | 9.00  | 14.00 | 3.00  | 1.39  |
| 3      | 43     | #NULL! | #NULL! | .20  | 24.00 | 21.00 | 11.00 | 15.00 | .00   | .00   |
| 0      | 28     | #NULL! | #NULL! | .20  | 15.00 | 17.00 | 8.00  | 6.00  | 4.00  | 1.61  |
| #NULL! | #NULL! | #NULL! | #NULL! | .23  | 37.00 | 20.00 | 11.00 | 18.00 | 1.00  | .69   |
| 1      | 28     | #NULL! | #NULL! | .23  | 28.00 | 21.00 | 18.00 | 16.00 | 2.00  | 1.10  |
| 1      | 39     | #NULL! | #NULL! | .24  | 25.00 | 22.00 | 13.00 | 11.00 | 8.00  | 2.20  |
| 6      | 5      | #NULL! | #NULL! | .30  | 71.00 | 31.00 | 22.00 | 28.00 | 18.00 | 2.94  |
| 3      | 26     | #NULL! | #NULL! | .22  | 31.00 | 18.00 | 9.00  | 17.00 | 1.00  | .69   |
| 6      | 17     | #NULL! | #NULL! | .24  | 35.00 | 25.00 | 24.00 | 17.00 | 5.00  | 1.79  |
| 0      | 17     | #NULL! | #NULL! | .23  | 30.00 | 20.00 | 10.00 | 8.00  | 2.00  | 1.10  |
| 2      | 43     | #NULL! | #NULL! | .28  | 38.00 | 16.00 | 13.00 | 20.00 | 4.00  | 1.61  |
| 6      | 9      | #NULL! | #NULL! | .23  | 39.00 | 20.00 | 12.00 | 19.00 | 8.00  | 2.20  |
| 0      | 39     | #NULL! | #NULL! | .22  | 30.00 | 20.00 | 16.00 | 16.00 | 4.00  | 1.61  |
| #NULL! | #NULL! | #NULL! | #NULL! | .22  | 24.00 | 17.00 | 10.00 | 23.00 | 6.00  | 1.95  |
| 1      | 34     | #NULL! | #NULL! | .20  | 21.00 | 15.00 | 12.00 | 4.00  | 2.00  | 1.10  |
| 1      | 39     | #NULL! | #NULL! | .23  | 15.00 | 17.00 | 10.00 | 16.00 | 9.00  | 2.30  |
| 0      | 28     | #NULL! | #NULL! | .21  | 27.00 | 27.00 | 10.00 | 16.00 | 2.00  | 1.10  |
| 1      | 58     | #NULL! | #NULL! | .21  | 20.00 | 2.00  | 3.00  | 7.00  | 2.00  | 1.10  |
| #NULL! | #NULL! | #NULL! | #NULL! | .20  | 17.00 | 15.00 | 4.00  | 6.00  | 3.00  | 1.39  |
| 0      | 24     | #NULL! | #NULL! | .22  | 12.00 | 12.00 | 7.00  | 15.00 | 1.00  | .69   |
| 2      | 21     | #NULL! | #NULL! | .22  | 26.00 | 19.00 | 16.00 | 3.00  | 6.00  | 1.95  |
| 0      | 38     | #NULL! | #NULL! | .24  | 21.00 | 6.00  | 12.00 | 14.00 | .00   | .00   |
| 6      | 10     | #NULL! | #NULL! | .23  | 20.00 | 16.00 | 21.00 | 25.00 | 6.00  | 1.95  |
| 0      | 43     | #NULL! | #NULL! | .23  | 15.00 | 8.00  | 8.00  | 8.00  | .00   | .00   |
| 2      | 25     | #NULL! | #NULL! | .23  | 22.00 | 18.00 | 17.00 | 20.00 | 6.00  | 1.95  |
| 6      | 5      | #NULL! | #NULL! | .19  | 15.00 | 19.00 | 12.00 | 19.00 | 1.00  | .69   |
| #NULL! | #NULL! | #NULL! | #NULL! | .21  | 12.00 | 21.00 | 6.00  | 3.00  | 1.00  | .69   |
| 0      | 31     | #NULL! | #NULL! | .21  | 28.00 | 6.00  | 7.00  | 12.00 | 2.00  | 1.10  |
| 1      | 21     | #NULL! | #NULL! | .25  | 32.00 | 22.00 | 13.00 | 18.00 | 4.00  | 1.61  |
| 1      | 48     | #NULL! | #NULL! | .26  | 43.00 | 23.00 | 17.00 | 17.00 | 16.00 | 2.83  |
| 1      | 30     | #NULL! | #NULL! | .20  | 22.00 | 1.00  | 10.00 | 10.00 | .00   | .00   |
| 3      | 51     | #NULL! | #NULL! | .25  | 38.00 | 22.00 | 16.00 | 15.00 | 11.00 | 2.48  |
| 0      | 6      | #NULL! | #NULL! | .22  | 48.00 | 20.00 | 4.00  | 16.00 | 5.00  | 1.79  |
| 2      | 33     | #NULL! | #NULL! | .23  | 37.00 | 20.00 | 8.00  | 24.00 | 5.00  | 1.79  |
| 5      | 26     | #NULL! | #NULL! | .29  | 60.00 | 22.00 | 20.00 | 25.00 | 7.00  | 2.08  |
| 1      | 38     | #NULL! | #NULL! | .24  | 26.00 | 19.00 | 15.00 | 16.00 | 7.00  | 2.08  |
| #NULL! | #NULL! | #NULL! | #NULL! | .21  | 30.00 | 15.00 | 7.00  | 15.00 | 1.00  | .69   |
| 6      | 8      | #NULL! | #NULL! | .28  | 41.00 | 21.00 | 20.00 | 26.00 | 5.00  | 1.79  |

|        |        |              |     |       |       |       |       |       |       |      |
|--------|--------|--------------|-----|-------|-------|-------|-------|-------|-------|------|
| 6      | 7      | #NULL!#NULL! | .28 | 44.00 | 24.00 | 14.00 | 23.00 | 15.00 | 2.77  |      |
| 5      | 15     | #NULL!#NULL! | .27 | 49.00 | 21.00 | 17.00 | 23.00 | 3.00  | 1.39  |      |
| 3      | 31     | #NULL!#NULL! | .24 | 37.00 | 20.00 | .00   | 23.00 | 3.00  | 1.39  |      |
| 6      | 8      | #NULL!#NULL! | .25 | 46.00 | 24.00 | 17.00 | 20.00 | 15.00 | 2.77  |      |
| 1      | 37     | #NULL!#NULL! | .23 | 20.00 | 14.00 | 6.00  | 4.00  | 1.00  | .69   |      |
| #NULL! | #NULL! | #NULL!#NULL! | .22 | 19.00 | 13.00 | 2.00  | 12.00 | 1.00  | .69   |      |
| 2      | 29     | #NULL!#NULL! | .22 | 15.00 | 18.00 | 5.00  | 16.00 | 15.00 | 2.77  |      |
| 4      | 35     | #NULL!#NULL! | .23 | 28.00 | 18.00 | 11.00 | 15.00 | 1.00  | .69   |      |
| 0      | 60     | #NULL!#NULL! | .21 | 17.00 | 15.00 | 6.00  | 11.00 | 2.00  | 1.10  |      |
| 5      | 25     | #NULL!#NULL! | .25 | 52.00 | 28.00 | 7.00  | 25.00 | 5.00  | 1.79  |      |
| #NULL! | #NULL! | #NULL!#NULL! | .24 | 28.00 | 20.00 | 12.00 | 18.00 | 1.00  | .69   |      |
| 0      | 82     | #NULL!#NULL! | .23 | 37.00 | 14.00 | 5.00  | 18.00 | 2.00  | 1.10  |      |
| #NULL! | #NULL! | #NULL!#NULL! | .26 | 50.00 | 23.00 | 2.00  | 16.00 | 1.00  | .69   |      |
| #NULL! | #NULL! | #NULL!#NULL! | .28 | 35.00 | 17.00 | 13.00 | 21.00 | 5.00  | 1.79  |      |
| 2      | 20     | #NULL!#NULL! | .29 | 49.00 | 18.00 | 5.00  | 20.00 | 8.00  | 2.20  |      |
| 4      | 37     | #NULL!#NULL! | .26 | 42.00 | 23.00 | 11.00 | 16.00 | 10.00 | 2.40  |      |
| 0      | 20     | #NULL!#NULL! | .22 | 16.00 | 16.00 | 10.00 | 11.00 | 5.00  | 1.79  |      |
| 1      | 49     | #NULL!#NULL! | .27 | 32.00 | 14.00 | 10.00 | 4.00  | 4.00  | 1.61  |      |
| 4      | 19     | #NULL!#NULL! | .29 | 39.00 | 17.00 | 16.00 | 18.00 | 12.00 | 2.56  |      |
| 1      | 41     | #NULL!#NULL! | .23 | 16.00 | 15.00 | 5.00  | 14.00 | 1.00  | .69   |      |
| #NULL! | #NULL! | #NULL!#NULL! | .24 | 20.00 | 19.00 | 8.00  | 6.00  | 5.00  | 1.79  |      |
| #NULL! | #NULL! | #NULL!#NULL! | .22 | 11.00 | 9.00  | 6.00  | 4.00  | 5.00  | 1.79  |      |
| #NULL! | #NULL! | #NULL!#NULL! | .23 | 24.00 | 10.00 | 6.00  | 3.00  | 1.00  | .69   |      |
| 0      | 95     | #NULL!#NULL! | .24 | 23.00 | 12.00 | 8.00  | 8.00  | 2.00  | 1.10  |      |
| 0      | 31     | #NULL!#NULL! | .23 | 33.00 | 14.00 | 7.00  | 15.00 | 6.00  | 1.95  |      |
| 0      | 92     | #NULL!#NULL! | .23 | 37.00 | 18.00 | 18.00 | 20.00 | 3.00  | 1.39  |      |
| 6      | 4      | #NULL!#NULL! | .27 | 40.00 | 29.00 | 18.00 | 27.00 | 7.00  | 2.08  |      |
| 1      | 44     | #NULL!#NULL! | .29 | 44.00 | 17.00 | 16.00 | 18.00 | 5.00  | 1.79  |      |
| 2      | 28     | #NULL!#NULL! | .23 | 34.00 | 25.00 | 18.00 | 25.00 | 7.00  | 2.08  |      |
| 1      | 29     | 10.002       | 14  | .23   | 23.00 | 12.00 | 11.00 | 14.00 | 5.00  | 1.79 |
| 2      | 50     | 11.192       | 15  | .22   | 27.00 | 14.00 | 13.00 | 18.00 | 2.00  | 1.10 |
| 4      | 24     | 10.317       | 23  | .26   | 34.00 | 17.00 | 11.00 | 13.00 | 7.00  | 2.08 |
| 0      | 19     | 12.047       | 25  | .24   | 38.00 | 27.00 | 18.00 | 18.00 | 4.00  | 1.61 |
| 0      | 36     | 13.300       | 21  | .20   | 20.00 | 21.00 | 7.00  | 14.00 | 2.00  | 1.10 |
| 1      | 45     | 8.894        | 36  | .22   | 24.00 | 24.00 | 12.00 | 16.00 | 5.00  | 1.79 |
| 1      | 86     | 12.549       | 13  | .19   | 19.00 | 11.00 | 2.00  | 15.00 | 1.00  | .69  |
| 1      | 34     | 6.441        | 31  | .30   | 59.00 | 13.00 | 18.00 | 22.00 | 17.00 | 2.89 |
| 0      | 82     | 11.942       | 36  | .25   | 46.00 | 20.00 | 10.00 | 19.00 | 2.00  | 1.10 |
| 1      | 32     | 12.632       | 25  | .20   | 34.00 | 14.00 | 13.00 | 13.00 | 2.00  | 1.10 |
| 6      | 15     | 12.889       | 25  | .42   | 27.00 | 23.00 | 13.00 | 22.00 | 5.00  | 1.79 |
| 6      | 15     | 10.560       | 38  | .25   | 50.00 | 27.00 | 17.00 | 24.00 | 17.00 | 2.89 |
| 4      | 27     | 11.289       | 30  | .25   | 40.00 | 16.00 | 14.00 | 14.00 | 13.00 | 2.64 |
| 5      | 15     | 11.901       | 25  | .22   | 32.00 | 26.00 | 18.00 | 20.00 | 3.00  | 1.39 |
| 1      | 38     | 4.217        | 23  | .22   | 28.00 | 17.00 | 7.00  | 14.00 | 5.00  | 1.79 |
| 1      | 47     | 13.055       | 27  | .19   | 19.00 | 16.00 | 8.00  | 12.00 | 1.00  | .69  |
| 3      | 24     | 5.519        | 36  | .22   | 35.00 | 22.00 | 18.00 | 19.00 | 8.00  | 2.20 |
| 2      | 55     | 4.627        | 14  | .24   | 29.00 | 16.00 | 12.00 | 16.00 | 6.00  | 1.95 |
| 6      | 9      | 8.822        | 36  | .26   | 41.00 | 17.00 | 14.00 | 17.00 | 7.00  | 2.08 |
| 0      | 30     | 12.852       | 6   | .22   | 23.00 | 5.00  | 4.00  | 7.00  | 2.00  | 1.10 |
| 0      | 91     | 5.132        | 23  | .26   | 37.00 | 14.00 | 15.00 | 12.00 | 3.00  | 1.39 |
| 0      | 85     | 10.615       | 19  | .23   | 17.00 | 16.00 | 5.00  | 17.00 | 2.00  | 1.10 |
| 0      | 72     | 11.179       | 16  | .21   | 16.00 | 15.00 | 16.00 | 8.00  | 1.00  | .69  |
| 1      | 41     | 12.450       | 12  | .23   | 36.00 | 14.00 | 9.00  | 10.00 | 4.00  | 1.61 |
| 1      | 15     | 12.852       | 14  | .62   | 21.00 | 6.00  | 6.00  | 8.00  | 3.00  | 1.39 |
| 1      | 49     | 13.043       | 32  | .23   | 20.00 | 16.00 | 11.00 | 16.00 | 2.00  | 1.10 |
| 1      | 34     | 10.553       | 20  | .23   | 33.00 | 17.00 | 14.00 | 15.00 | 2.00  | 1.10 |
| 4      | 26     | 13.300       | 18  | .25   | 38.00 | 18.00 | 15.00 | 18.00 | 5.00  | 1.79 |
| 1      | 18     | 6.918        | 12  | .20   | 13.00 | 11.00 | 7.00  | 10.00 | 2.00  | 1.10 |
| 1      | 34     | 13.300       | 28  | .25   | 36.00 | 17.00 | 13.00 | 10.00 | 4.00  | 1.61 |
| 2      | 33     | 9.089        | 15  | .24   | 27.00 | 12.00 | 14.00 | 12.00 | 1.00  | .69  |
| 2      | 31     | 12.558       | 32  | .22   | 32.00 | 21.00 | 14.00 | 19.00 | 7.00  | 2.08 |
| 1      | 49     | 13.300       | 23  | .21   | 46.00 | 17.00 | 11.00 | 15.00 | 3.00  | 1.39 |



|   |    |        |    |     |       |       |       |       |       |      |
|---|----|--------|----|-----|-------|-------|-------|-------|-------|------|
| 2 | 39 | 12.910 | 25 | .25 | 50.00 | 20.00 | 14.00 | 12.00 | 4.00  | 1.61 |
| 1 | 51 | 13.300 | 18 | .21 | 42.00 | 17.00 | 16.00 | 14.00 | 2.00  | 1.10 |
| 0 | 8  | 10.134 | 29 | .21 | 35.00 | 22.00 | 16.00 | 15.00 | 3.00  | 1.39 |
| 2 | 43 | 12.483 | 17 | .23 | 13.00 | 16.00 | 7.00  | 11.00 | 3.00  | 1.39 |
| 3 | 19 | 4.879  | 21 | .25 | 32.00 | 16.00 | 8.00  | 13.00 | 2.00  | 1.10 |
| 0 | 39 | 12.421 | 27 | .24 | 50.00 | 19.00 | 19.00 | 17.00 | 3.00  | 1.39 |
| 0 | 23 | 12.069 | 29 | .21 | 29.00 | 26.00 | 11.00 | 25.00 | 5.00  | 1.79 |
| 1 | 27 | 12.860 | 21 | .20 | 29.00 | 11.00 | 14.00 | 22.00 | 3.00  | 1.39 |
| 1 | 28 | 13.300 | 29 | .26 | 46.00 | 19.00 | 10.00 | 21.00 | 4.00  | 1.61 |
| 5 | 21 | 13.105 | 25 | .24 | 35.00 | 14.00 | 10.00 | 17.00 | 1.00  | .69  |
| 2 | 28 | 9.530  | 27 | .23 | 12.00 | 16.00 | 10.00 | 16.00 | 2.00  | 1.10 |
| 0 | 90 | 13.134 | 8  | .19 | 14.00 | 8.00  | 8.00  | 7.00  | 1.00  | .69  |
| 0 | 75 | 8.715  | 2  | .19 | 23.00 | 17.00 | 9.00  | 15.00 | 3.00  | 1.39 |
| 1 | 30 | 10.173 | 12 | .22 | 39.00 | 20.00 | 10.00 | 16.00 | 1.00  | .69  |
| 1 | 20 | 11.755 | 23 | .25 | 41.00 | 14.00 | 4.00  | 13.00 | 2.00  | 1.10 |
| 0 | 17 | 10.313 | 12 | .20 | 17.00 | 15.00 | 3.00  | 10.00 | 1.00  | .69  |
| 0 | 17 | 11.715 | 36 | .24 | 35.00 | 16.00 | 14.00 | 14.00 | 2.00  | 1.10 |
| 1 | 70 | 12.993 | 27 | .18 | 21.00 | 14.00 | 15.00 | 13.00 | 1.00  | .69  |
| 1 | 20 | 11.388 | 23 | .22 | 24.00 | 15.00 | 11.00 | 13.00 | 2.00  | 1.10 |
| 1 | 51 | 9.246  | 24 | .20 | 20.00 | 26.00 | 15.00 | 16.00 | 1.00  | .69  |
| 0 | 21 | 12.457 | 6  | .22 | 19.00 | 12.00 | 2.00  | 14.00 | 10.00 | 2.40 |
| 0 | 17 | 11.178 | 6  | .21 | 15.00 | 13.00 | 1.00  | 11.00 | 6.00  | 1.95 |
| 0 | 27 | 7.594  | 0  | .18 | 4.00  | 10.00 | 2.00  | 3.00  | .00   | .00  |
| 3 | 40 | 1.401  | 14 | .25 | 29.00 | 17.00 | 10.00 | 19.00 | 11.00 | 2.48 |
| 1 | 33 | 10.021 | 23 | .22 | 33.00 | 13.00 | 10.00 | 17.00 | 6.00  | 1.95 |
| 4 | 35 | 9.063  | 6  | .24 | 32.00 | 18.00 | 12.00 | 15.00 | 3.00  | 1.39 |
| 1 | 39 | 13.250 | 27 | .21 | 33.00 | 19.00 | 9.00  | 10.00 | 2.00  | 1.10 |
| 1 | 19 | 12.860 | 38 | .24 | 37.00 | 16.00 | 12.00 | 14.00 | 9.00  | 2.30 |
| 3 | 38 | 13.300 | 33 | .22 | 20.00 | 23.00 | 15.00 | 18.00 | 4.00  | 1.61 |
| 1 | 39 | 10.724 | 25 | .20 | 28.00 | 15.00 | 6.00  | 11.00 | 1.00  | .69  |
| 0 | 37 | 9.147  | 15 | .21 | 31.00 | 19.00 | 11.00 | 15.00 | 1.00  | .69  |
| 3 | 18 | 11.047 | 25 | .22 | 39.00 | 25.00 | 16.00 | 25.00 | 3.00  | 1.39 |
| 0 | 92 | 12.782 | 25 | .25 | 42.00 | 22.00 | 11.00 | 15.00 | 3.00  | 1.39 |
| 0 | 51 | 10.814 | 8  | .23 | 19.00 | 11.00 | 1.00  | 13.00 | 2.00  | 1.10 |
| 0 | 95 | 12.852 | 10 | .21 | 23.00 | 11.00 | 6.00  | 3.00  | 1.00  | .69  |
| 1 | 33 | 8.914  | 6  | .19 | 13.00 | 12.00 | 8.00  | 11.00 | 1.00  | .69  |
| 1 | 33 | 11.710 | 17 | .27 | 40.00 | 11.00 | 14.00 | 8.00  | 4.00  | 1.61 |
| 0 | 44 | 5.465  | 29 | .22 | 27.00 | 12.00 | 12.00 | 15.00 | 1.00  | .69  |
| 5 | 31 | 10.615 | 38 | .23 | 48.00 | 24.00 | 19.00 | 26.00 | 4.00  | 1.61 |
| 1 | 42 | 11.009 | 27 | .25 | 42.00 | 21.00 | 18.00 | 19.00 | 9.00  | 2.30 |
| 1 | 51 | 12.125 | 19 | .23 | 32.00 | 14.00 | 14.00 | 14.00 | 4.00  | 1.61 |
| 6 | 5  | 5.542  | 34 | .31 | 62.00 | 27.00 | 12.00 | 25.00 | 21.00 | 3.09 |
| 1 | 64 | 11.494 | 27 | .20 | 22.00 | 4.00  | 5.00  | 9.00  | 2.00  | 1.10 |
| 1 | 24 | 11.175 | 36 | .23 | 46.00 | 27.00 | 16.00 | 17.00 | 3.00  | 1.39 |
| 0 | 67 | 12.523 | 19 | .23 | 29.00 | 11.00 | 10.00 | 5.00  | 2.00  | 1.10 |
| 0 | 94 | 11.924 | 27 | .23 | 35.00 | 20.00 | 15.00 | 15.00 | 2.00  | 1.10 |
| 0 | 14 | 11.566 | 32 | .22 | 28.00 | 10.00 | 12.00 | 16.00 | 2.00  | 1.10 |
| 1 | 21 | 11.561 | 25 | .24 | 35.00 | 15.00 | 13.00 | 17.00 | 8.00  | 2.20 |
| 1 | 86 | 8.462  | 17 | .24 | 25.00 | 12.00 | 10.00 | 7.00  | 5.00  | 1.79 |
| 0 | 63 | 11.765 | 31 | .24 | 55.00 | 23.00 | 13.00 | 13.00 | 3.00  | 1.39 |
| 0 | 18 | 4.600  | 23 | .22 | 18.00 | 22.00 | 16.00 | 11.00 | 5.00  | 1.79 |
| 0 | 27 | 4.395  | 15 | .25 | 29.00 | 13.00 | 6.00  | 13.00 | 17.00 | 2.89 |
| 0 | 18 | 4.023  | 26 | .23 | 31.00 | 27.00 | 15.00 | 16.00 | 4.00  | 1.61 |
| 1 | 43 | 10.440 | 23 | .23 | 37.00 | 16.00 | 10.00 | 11.00 | 6.00  | 1.95 |
| 0 | 61 | 5.830  | 36 | .30 | 51.00 | 25.00 | 18.00 | 17.00 | 7.00  | 2.08 |
| 0 | 89 | 11.955 | 25 | .20 | 16.00 | 22.00 | 17.00 | 15.00 | 3.00  | 1.39 |
| 1 | 40 | 6.027  | 12 | .24 | 47.00 | 21.00 | 17.00 | 23.00 | 14.00 | 2.71 |
| 1 | 36 | 12.939 | 20 | .23 | 26.00 | 21.00 | 14.00 | 14.00 | 18.00 | 2.94 |
| 4 | 41 | 13.043 | 15 | .25 | 29.00 | 12.00 | 12.00 | 18.00 | 4.00  | 1.61 |
| 1 | 24 | 11.940 | 2  | .22 | 25.00 | 13.00 | 13.00 | 8.00  | 7.00  | 2.08 |
| 1 | 31 | 10.740 | 31 | .26 | 32.00 | 28.00 | 12.00 | 18.00 | 15.00 | 2.77 |
| 0 | 21 | 12.599 | 19 | .22 | 20.00 | 11.00 | 13.00 | 10.00 | 8.00  | 2.20 |

|   |    |        |    |     |       |       |       |       |       |      |
|---|----|--------|----|-----|-------|-------|-------|-------|-------|------|
| 6 | 9  | 6.062  | 36 | .22 | 38.00 | 31.00 | 19.00 | 25.00 | 9.00  | 2.30 |
| 6 | 23 | 13.300 | 17 | .20 | 28.00 | 14.00 | 12.00 | 5.00  | 2.00  | 1.10 |
| 0 | 17 | 9.035  | 11 | .19 | 18.00 | 12.00 | 12.00 | 8.00  | 1.00  | .69  |
| 6 | 18 | 10.491 | 36 | .22 | 34.00 | 32.00 | 14.00 | 26.00 | 14.00 | 2.71 |
| 6 | 30 | 3.374  | 23 | .22 | 19.00 | 17.00 | 12.00 | 19.00 | 8.00  | 2.20 |
| 1 | 54 | 8.716  | 25 | .27 | 54.00 | 31.00 | 18.00 | 23.00 | 11.00 | 2.48 |
| 0 | 91 | 8.677  | 25 | .21 | 38.00 | 21.00 | 7.00  | 19.00 | 3.00  | 1.39 |
| 1 | 38 | 12.602 | 31 | .28 | 50.00 | 25.00 | 17.00 | 18.00 | 14.00 | 2.71 |
| 1 | 49 | 10.466 | 25 | .23 | 35.00 | 15.00 | 11.00 | 17.00 | 6.00  | 1.95 |
| 0 | 18 | 12.384 | 23 | .26 | 20.00 | 12.00 | 10.00 | 11.00 | 5.00  | 1.79 |
| 6 | 14 | 6.233  | 25 | .26 | 32.00 | 27.00 | 17.00 | 24.00 | 19.00 | 3.00 |
| 1 | 35 | 5.520  | 23 | .28 | 30.00 | 22.00 | 12.00 | 13.00 | 16.00 | 2.83 |
| 2 | 62 | 6.781  | 14 | .21 | 27.00 | 17.00 | 8.00  | 17.00 | 2.00  | 1.10 |
| 6 | 16 | 10.789 | 29 | .26 | 65.00 | 30.00 | 16.00 | 23.00 | 20.00 | 3.04 |
| 4 | 23 | 4.896  | 36 | .25 | 53.00 | 25.00 | 9.00  | 24.00 | 11.00 | 2.48 |
| 2 | 42 | 13.043 | 38 | .25 | 45.00 | 20.00 | 17.00 | 18.00 | 2.00  | 1.10 |
| 2 | 29 | 10.781 | 33 | .23 | 24.00 | 17.00 | 7.00  | 18.00 | 2.00  | 1.10 |
| 1 | 27 | 10.818 | 34 | .24 | 43.00 | 27.00 | 16.00 | 22.00 | 3.00  | 1.39 |
| 4 | 21 | 12.457 | 40 | .24 | 56.00 | 30.00 | 16.00 | 25.00 | 5.00  | 1.79 |
| 1 | 56 | 11.652 | 8  | .26 | 19.00 | 18.00 | 2.00  | 9.00  | 4.00  | 1.61 |
| 0 | 29 | 6.408  | 36 | .25 | 35.00 | 22.00 | 16.00 | 18.00 | 13.00 | 2.64 |
| 1 | 45 | 8.710  | 21 | .26 | 28.00 | 21.00 | 8.00  | 11.00 | 1.00  | .69  |
| 0 | 15 | 8.178  | 19 | .20 | 24.00 | 14.00 | 6.00  | 9.00  | 3.00  | 1.39 |
| 0 | 80 | 8.013  | 2  | .21 | 35.00 | 9.00  | 5.00  | 11.00 | 4.00  | 1.61 |
| 0 | 73 | 7.067  | 10 | .21 | 31.00 | 16.00 | 5.00  | 11.00 | 5.00  | 1.79 |
| 2 | 39 | 11.504 | 34 | .23 | 50.00 | 23.00 | 15.00 | 22.00 | 14.00 | 2.71 |
| 5 | 12 | 8.388  | 38 | .24 | 50.00 | 22.00 | 16.00 | 25.00 | 11.00 | 2.48 |
| 1 | 20 | 10.699 | 21 | .23 | 44.00 | 17.00 | 6.00  | 11.00 | 2.00  | 1.10 |
| 3 | 25 | 11.998 | 38 | .24 | 22.00 | 21.00 | 13.00 | 15.00 | 5.00  | 1.79 |
| 6 | 3  | 12.798 | 36 | .31 | 53.00 | 31.00 | 20.00 | 25.00 | 9.00  | 2.30 |
| 6 | 14 | 13.134 | 14 | .23 | 35.00 | 17.00 | 8.00  | 14.00 | 2.00  | 1.10 |
| 1 | 36 | 11.125 | 30 | .23 | 24.00 | 20.00 | 19.00 | 16.00 | 19.00 | 3.00 |
| 0 | 32 | 8.902  | 25 | .23 | 27.00 | 17.00 | 9.00  | 14.00 | 1.00  | .69  |
| 4 | 24 | 12.416 | 18 | .22 | 14.00 | 10.00 | 8.00  | 13.00 | 2.00  | 1.10 |
| 0 | 20 | 5.676  | 14 | .20 | 22.00 | 15.00 | 11.00 | 14.00 | 6.00  | 1.95 |
| 1 | 66 | 12.852 | 18 | .24 | 31.00 | 15.00 | 4.00  | 11.00 | 11.00 | 2.48 |
| 6 | 18 | 7.886  | 27 | .28 | 56.00 | 19.00 | 12.00 | 25.00 | 14.00 | 2.71 |
| 4 | 41 | 2.072  | 27 | .25 | 50.00 | 16.00 | 19.00 | 24.00 | 10.00 | 2.40 |
| 0 | 22 | 12.026 | 27 | .21 | 49.00 | 18.00 | 11.00 | 23.00 | 4.00  | 1.61 |
| 1 | 53 | 13.043 | 19 | .23 | 24.00 | 11.00 | 14.00 | 8.00  | 3.00  | 1.39 |
| 0 | 22 | 9.549  | 19 | .20 | 18.00 | 11.00 | 11.00 | 4.00  | 1.00  | .69  |
| 1 | 44 | 7.300  | 17 | .24 | 28.00 | 31.00 | 15.00 | 17.00 | 9.00  | 2.30 |
| 2 | 33 | 12.104 | 25 | .23 | 35.00 | 19.00 | 17.00 | 21.00 | 11.00 | 2.48 |
| 2 | 54 | 13.250 | 15 | .20 | 19.00 | 11.00 | 8.00  | 9.00  | 7.00  | 2.08 |
| 0 | 15 | 10.935 | 16 | .19 | 5.00  | 10.00 | .00   | 4.00  | 2.00  | 1.10 |
| 1 | 65 | 13.134 | 23 | .22 | 23.00 | 25.00 | 18.00 | 19.00 | 7.00  | 2.08 |
| 1 | 64 | 12.889 | 25 | .22 | 31.00 | 14.00 | 12.00 | 17.00 | 4.00  | 1.61 |
| 4 | 20 | 10.970 | 36 | .23 | 41.00 | 18.00 | 13.00 | 15.00 | 3.00  | 1.39 |
| 0 | 33 | 13.300 | 29 | .23 | 33.00 | 28.00 | 15.00 | 20.00 | 11.00 | 2.48 |
| 1 | 32 | 10.511 | 29 | .26 | 38.00 | 12.00 | 1.00  | 13.00 | 9.00  | 2.30 |
| 2 | 37 | 13.300 | 25 | .26 | 31.00 | 16.00 | 12.00 | 16.00 | 10.00 | 2.40 |
| 4 | 30 | 9.927  | 25 | .25 | 23.00 | 18.00 | 11.00 | 11.00 | 4.00  | 1.61 |
| 1 | 38 | 10.431 | 34 | .25 | 38.00 | 20.00 | 15.00 | 18.00 | 11.00 | 2.48 |
| 2 | 36 | 11.972 | 23 | .20 | 29.00 | 30.00 | 15.00 | 18.00 | 5.00  | 1.79 |
| 1 | 23 | 8.730  | 21 | .22 | 9.00  | 11.00 | 11.00 | 10.00 | 4.00  | 1.61 |
| 6 | 30 | 10.922 | 34 | .27 | 45.00 | 26.00 | 18.00 | 22.00 | 7.00  | 2.08 |
| 4 | 32 | 12.615 | 31 | .25 | 37.00 | 20.00 | 14.00 | 24.00 | 6.00  | 1.95 |
| 0 | 71 | 8.035  | 17 | .25 | 18.00 | 10.00 | 13.00 | 9.00  | 4.00  | 1.61 |
| 3 | 28 | 11.304 | 25 | .24 | 23.00 | 19.00 | 16.00 | 15.00 | 14.00 | 2.71 |
| 0 | 35 | 12.051 | 14 | .24 | 24.00 | 20.00 | 10.00 | 15.00 | 1.00  | .69  |
| 0 | 88 | 12.860 | 19 | .23 | 20.00 | 8.00  | 11.00 | 10.00 | 7.00  | 2.08 |
| 1 | 44 | 10.637 | 8  | .21 | 16.00 | 16.00 | 5.00  | 11.00 | 4.00  | 1.61 |

|   |    |        |    |     |       |       |       |       |       |      |
|---|----|--------|----|-----|-------|-------|-------|-------|-------|------|
| 1 | 66 | 11.467 | 23 | .24 | 34.00 | 18.00 | 11.00 | 11.00 | 9.00  | 2.30 |
| 0 | 73 | 11.378 | 8  | .24 | 20.00 | 13.00 | 11.00 | 16.00 | 2.00  | 1.10 |
| 1 | 34 | 12.910 | 23 | .21 | 30.00 | 15.00 | 10.00 | 10.00 | 4.00  | 1.61 |
| 2 | 42 | 11.379 | 21 | .27 | 48.00 | 19.00 | 12.00 | 12.00 | 10.00 | 2.40 |
| 6 | 14 | 7.511  | 29 | .25 | 47.00 | 26.00 | 13.00 | 16.00 | 6.00  | 1.95 |
| 2 | 31 | 11.354 | 18 | .26 | 37.00 | 19.00 | 11.00 | 14.00 | 2.00  | 1.10 |
| 1 | 19 | 13.010 | 25 | .22 | 28.00 | 16.00 | 16.00 | 17.00 | 13.00 | 2.64 |
| 0 | 29 | 5.764  | 19 | .23 | 27.00 | 15.00 | 9.00  | 14.00 | 3.00  | 1.39 |
| 2 | 39 | 10.644 | 25 | .25 | 27.00 | 22.00 | 13.00 | 19.00 | 2.00  | 1.10 |
| 6 | 4  | 10.983 | 25 | .27 | 44.00 | 26.00 | 15.00 | 25.00 | 11.00 | 2.48 |
| 1 | 26 | 10.046 | 23 | .28 | 36.00 | 22.00 | 13.00 | 16.00 | 5.00  | 1.79 |
| 5 | 30 | 7.806  | 34 | .22 | 23.00 | 20.00 | 12.00 | 20.00 | 5.00  | 1.79 |
| 6 | 8  | 11.863 | 34 | .25 | 35.00 | 16.00 | 16.00 | 21.00 | 13.00 | 2.64 |
| 1 | 29 | 12.491 | 25 | .25 | 36.00 | 22.00 | 13.00 | 14.00 | 19.00 | 3.00 |
| 4 | 40 | 11.786 | 27 | .22 | 31.00 | 20.00 | 13.00 | 18.00 | 6.00  | 1.95 |
| 1 | 40 | 8.750  | 27 | .27 | 59.00 | 26.00 | 21.00 | 23.00 | 9.00  | 2.30 |
| 0 | 18 | 10.049 | 19 | .23 | 18.00 | 12.00 | 4.00  | 16.00 | 4.00  | 1.61 |
| 2 | 46 | 3.881  | 33 | .30 | 52.00 | 26.00 | 16.00 | 25.00 | 23.00 | 3.18 |
| 1 | 28 | 13.084 | 30 | .23 | 29.00 | 20.00 | 8.00  | 14.00 | 1.00  | .69  |
| 0 | 53 | 13.043 | 27 | .27 | 43.00 | 26.00 | 17.00 | 21.00 | 15.00 | 2.77 |
| 2 | 31 | 10.627 | 29 | .26 | 36.00 | 26.00 | 17.00 | 13.00 | 9.00  | 2.30 |
| 5 | 17 | 12.939 | 31 | .24 | 34.00 | 22.00 | 16.00 | 18.00 | 19.00 | 3.00 |
| 0 | 10 | 9.992  | 4  | .19 | 12.00 | 12.00 | 3.00  | 9.00  | 1.00  | .69  |

| BVMT1 | CF1   | EIT1  | cptd1  | stroop1 | phantom hearingg | Grouping | smoking | joking | timeof | smoking of | disease |
|-------|-------|-------|--------|---------|------------------|----------|---------|--------|--------|------------|---------|
| 16.00 | 30.00 | 7.36  | #NULL! | 39.00   | #NULL!           | 2        | 2.00    | 36.00  | 20.00  | 35.00      |         |
| 19.00 | 18.00 | 7.42  | #NULL! | 40.00   | #NULL!           | 2        | 2.00    | 15.00  | 10.00  | 26.00      |         |
| 28.00 | 15.00 | 7.50  | #NULL! | 66.00   | 4                | 1        | 1.00    | #NULL! | #NULL! | 27.00      |         |
| 22.00 | 20.00 | 11.32 | #NULL! | 60.00   | #NULL!           | 2        | 2.00    | 15.00  | 40.00  | 14.00      |         |
| 22.00 | 20.00 | 7.63  | #NULL! | 40.00   | #NULL!           | 2        | 2.00    | 20.00  | 20.00  | 22.00      |         |
| 15.00 | 12.00 | 8.09  | #NULL! | 11.00   | #NULL!           | 2        | 1.00    | #NULL! | #NULL! | 17.00      |         |
| 8.00  | 12.00 | 5.34  | #NULL! | 20.00   | #NULL!           | 2        | 2.00    | 28.00  | 20.00  | 28.00      |         |
| 10.00 | 3.00  | 8.47  | #NULL! | 18.00   | #NULL!           | 2        | 1.00    | #NULL! | #NULL! | 22.00      |         |
| 10.00 | 21.00 | 7.75  | #NULL! | 28.00   | #NULL!           | 2        | 2.00    | 25.00  | 20.00  | 27.00      |         |
| 7.00  | 19.00 | 6.77  | #NULL! | 35.00   | #NULL!           | 2        | 1.00    | #NULL! | #NULL! | 25.00      |         |
| 16.00 | 23.00 | 7.58  | #NULL! | 34.00   | #NULL!           | 2        | 1.00    | #NULL! | #NULL! | 9.00       |         |
| 14.00 | 20.00 | 8.87  | #NULL! | 34.00   | #NULL!           | 2        | 1.00    | #NULL! | #NULL! | 36.00      |         |
| 7.00  | 24.00 | 8.49  | #NULL! | 32.00   | #NULL!           | 2        | #NULL!  | #NULL! | #NULL! | 29.00      |         |
| 17.00 | 18.00 | 8.98  | #NULL! | 41.00   | #NULL!           | 2        | 2.00    | 20.00  | 10.00  | 29.00      |         |
| 11.00 | 17.00 | 10.74 | #NULL! | 38.00   | #NULL!           | 2        | 2.00    | 4.00   | 10.00  | 3.00       |         |
| 16.00 | 15.00 | 8.29  | #NULL! | 41.00   | #NULL!           | 2        | 1.00    | #NULL! | #NULL! | 36.00      |         |
| 15.00 | 17.00 | 8.36  | #NULL! | 49.00   | #NULL!           | 2        | 1.00    | #NULL! | #NULL! | 14.00      |         |
| 20.00 | 14.00 | 6.06  | #NULL! | 27.00   | #NULL!           | 2        | 1.00    | #NULL! | #NULL! | 16.00      |         |
| 13.00 | 16.00 | 8.01  | #NULL! | 25.00   | 5                | 1        | 1.00    | #NULL! | #NULL! | 31.00      |         |
| 29.00 | 16.00 | 8.11  | #NULL! | 28.00   | #NULL!           | 2        | 1.00    | #NULL! | #NULL! | 16.00      |         |
| 21.00 | 26.00 | 9.64  | #NULL! | 28.00   | 6                | 1        | #NULL!  | #NULL! | #NULL! | 10.00      |         |
| 19.00 | 19.00 | 7.46  | #NULL! | 50.00   | #NULL!           | 2        | 1.00    | #NULL! | #NULL! | 27.00      |         |
| 31.00 | 16.00 | 7.26  | #NULL! | 50.00   | #NULL!           | 2        | 1.00    | #NULL! | #NULL! | 4.00       |         |
| 11.00 | 22.00 | 7.79  | #NULL! | 62.00   | #NULL!           | 2        | 1.00    | #NULL! | #NULL! | 19.00      |         |
| 6.00  | 15.00 | 7.45  | #NULL! | 35.00   | #NULL!           | 2        | 2.00    | 26.00  | 7.00   | 41.00      |         |
| 6.00  | 17.00 | 9.17  | #NULL! | 23.00   | #NULL!           | 2        | 2.00    | 30.00  | 30.00  | 31.00      |         |
| 19.00 | 12.00 | 9.92  | #NULL! | 39.00   | #NULL!           | 2        | 1.00    | #NULL! | #NULL! | 16.00      |         |
| 29.00 | 22.00 | 6.72  | #NULL! | 32.00   | #NULL!           | 2        | 1.00    | #NULL! | #NULL! | 21.00      |         |
| 16.00 | 33.00 | 7.09  | #NULL! | 35.00   | #NULL!           | 2        | 2.00    | 20.00  | 20.00  | 20.00      |         |
| 28.00 | 32.00 | 11.90 | #NULL! | 70.00   | #NULL!           | 2        | 1.00    | #NULL! | #NULL! | 13.00      |         |
| 12.00 | 19.00 | 7.12  | #NULL! | 38.00   | #NULL!           | 2        | 1.00    | #NULL! | #NULL! | 24.00      |         |
| 6.00  | 19.00 | 9.90  | #NULL! | 38.00   | #NULL!           | 2        | 2.00    | 20.00  | 5.00   | 21.00      |         |
| 7.00  | 11.00 | 5.94  | #NULL! | 25.00   | 5                | 1        | 2.00    | #NULL! | #NULL! | 25.00      |         |
| 25.00 | 25.00 | 11.05 | #NULL! | 46.00   | #NULL!           | 2        | 2.00    | 20.00  | 20.00  | 5.00       |         |
| 19.00 | 21.00 | 10.43 | #NULL! | 47.00   | #NULL!           | 2        | 2.00    | 42.00  | 6.00   | 44.00      |         |
| 6.00  | 26.00 | 8.71  | #NULL! | 42.00   | #NULL!           | 2        | 2.00    | 34.00  | 20.00  | 36.00      |         |
| 11.00 | 25.00 | 7.95  | #NULL! | 60.00   | #NULL!           | 2        | 2.00    | #NULL! | 5.00   | 24.00      |         |
| 6.00  | 14.00 | 7.01  | #NULL! | 26.00   | 5                | 1        | 1.00    | #NULL! | #NULL! | 36.00      |         |
| 17.00 | 16.00 | 7.87  | #NULL! | 39.00   | #NULL!           | 2        | 2.00    | 34.00  | 20.00  | 28.00      |         |
| 20.00 | 19.00 | 6.90  | #NULL! | 44.00   | #NULL!           | 2        | 2.00    | 41.00  | 20.00  | 35.00      |         |
| 3.00  | 8.00  | 6.15  | #NULL! | 28.00   | #NULL!           | 2        | 2.00    | 27.00  | 20.00  | 28.00      |         |
| 8.00  | 19.00 | 9.57  | #NULL! | 37.00   | #NULL!           | 2        | 2.00    | 20.00  | 15.00  | 20.00      |         |
| 7.00  | 9.00  | 6.04  | #NULL! | 20.00   | #NULL!           | 2        | 2.00    | 20.00  | 10.00  | 34.00      |         |
| 14.00 | 9.00  | 5.47  | #NULL! | 37.00   | #NULL!           | 2        | 2.00    | 30.00  | 15.00  | 31.00      |         |
| 7.00  | 29.00 | 11.58 | #NULL! | 38.00   | #NULL!           | 2        | 2.00    | 25.00  | 4.00   | 31.00      |         |
| 27.00 | 16.00 | 7.75  | #NULL! | 49.00   | #NULL!           | 2        | #NULL!  | #NULL! | #NULL! | 23.00      |         |
| 5.00  | 10.00 | 8.86  | #NULL! | 39.00   | #NULL!           | 2        | 2.00    | 17.00  | 5.00   | 33.00      |         |
| 12.00 | 32.00 | 7.10  | #NULL! | 32.00   | 5                | 1        | 2.00    | 30.00  | 5.00   | 22.00      |         |
| 20.00 | 15.00 | 8.13  | #NULL! | 43.00   | #NULL!           | 2        | 2.00    | 30.00  | 5.00   | 27.00      |         |
| 4.00  | 15.00 | 6.59  | #NULL! | 27.00   | 3                | 1        | 1.00    | #NULL! | #NULL! | 30.00      |         |
| 4.00  | 9.00  | 6.81  | #NULL! | 14.00   | 5                | 1        | 1.00    | #NULL! | #NULL! | 30.00      |         |
| 15.00 | 31.00 | 9.44  | #NULL! | 34.00   | #NULL!           | 2        | 1.00    | #NULL! | #NULL! | 22.00      |         |
| 27.00 | 21.00 | 6.74  | #NULL! | 39.00   | #NULL!           | 2        | 1.00    | #NULL! | #NULL! | 6.00       |         |
| 2.00  | 16.00 | 8.69  | #NULL! | 23.00   | #NULL!           | 2        | 1.00    | #NULL! | #NULL! | 22.00      |         |
| 25.00 | 15.00 | 10.43 | #NULL! | 40.00   | #NULL!           | 2        | 2.00    | 20.00  | 5.00   | 23.00      |         |
| 16.00 | 15.00 | 6.76  | #NULL! | 39.00   | #NULL!           | 2        | 2.00    | 20.00  | 5.00   | 29.00      |         |
| 27.00 | 23.00 | 8.23  | #NULL! | 39.00   | #NULL!           | 2        | 1.00    | #NULL! | #NULL! | 2.00       |         |
| 25.00 | 19.00 | 8.84  | #NULL! | 50.00   | #NULL!           | 2        | #NULL!  | #NULL! | #NULL! | 13.00      |         |
| 16.00 | 14.00 | 8.52  | #NULL! | 31.00   | #NULL!           | 2        | 1.00    | #NULL! | #NULL! | 55.00      |         |
| 13.00 | 7.00  | 7.56  | #NULL! | 30.00   | #NULL!           | 2        | 1.00    | #NULL! | #NULL! | 17.00      |         |
| 30.00 | 24.00 | 7.18  | #NULL! | 59.00   | #NULL!           | 2        | 1.00    | #NULL! | #NULL! | 17.00      |         |

|       |       |       |        |       |        |   |        |        |        |        |
|-------|-------|-------|--------|-------|--------|---|--------|--------|--------|--------|
| 29.00 | 32.00 | 10.65 | #NULL! | 47.00 | #NULL! | 2 | 1.00   | #NULL! | #NULL! | 25.00  |
| 26.00 | 28.00 | 5.71  | #NULL! | 43.00 | #NULL! | 2 | 1.00   | #NULL! | #NULL! | 21.00  |
| 7.00  | 20.00 | 8.17  | #NULL! | 39.00 | #NULL! | 2 | 1.00   | #NULL! | #NULL! | 10.00  |
| 26.00 | 9.00  | 7.15  | #NULL! | 53.00 | #NULL! | 2 | 1.00   | #NULL! | #NULL! | 7.00   |
| 8.00  | 12.00 | 6.94  | #NULL! | 28.00 | #NULL! | 2 | #NULL! | #NULL! | #NULL! | 23.00  |
| 10.00 | 7.00  | 3.82  | #NULL! | 27.00 | #NULL! | 2 | 2.00   | 20.00  | 15.00  | 3.00   |
| 7.00  | 11.00 | 6.72  | #NULL! | 18.00 | #NULL! | 2 | 1.00   | #NULL! | #NULL! | 31.00  |
| 24.00 | 10.00 | 7.56  | #NULL! | 44.00 | #NULL! | 2 | 2.00   | 23.00  | 20.00  | 21.00  |
| 24.00 | 7.00  | 6.93  | #NULL! | 30.00 | #NULL! | 2 | 1.00   | #NULL! | #NULL! | 20.00  |
| 29.00 | 21.00 | 8.20  | #NULL! | 54.00 | #NULL! | 2 | 1.00   | #NULL! | #NULL! | 18.00  |
| 14.00 | 5.00  | 5.94  | #NULL! | 48.00 | #NULL! | 2 | 1.00   | #NULL! | #NULL! | 29.00  |
| 16.00 | 8.00  | 6.59  | #NULL! | 18.00 | #NULL! | 2 | 1.00   | #NULL! | #NULL! | 26.00  |
| 13.00 | 23.00 | 5.26  | #NULL! | 25.00 | #NULL! | 2 | 1.00   | #NULL! | #NULL! | 10.00  |
| 26.00 | 14.00 | 6.74  | #NULL! | 32.00 | #NULL! | 2 | 1.00   | #NULL! | #NULL! | 13.00  |
| 19.00 | 14.00 | 8.41  | #NULL! | 46.00 | #NULL! | 2 | 1.00   | #NULL! | #NULL! | 18.00  |
| 20.00 | 42.00 | 8.11  | #NULL! | 40.00 | #NULL! | 2 | 1.00   | #NULL! | #NULL! | 28.00  |
| 4.00  | 4.00  | 6.60  | #NULL! | 20.00 | #NULL! | 2 | 1.00   | #NULL! | #NULL! | 37.00  |
| 8.00  | 26.00 | 8.51  | #NULL! | 10.00 | #NULL! | 2 | 2.00   | 4.00   | 5.00   | 13.00  |
| 12.00 | 21.00 | 8.49  | #NULL! | 43.00 | #NULL! | 2 | 1.00   | #NULL! | #NULL! | 24.00  |
| 12.00 | 17.00 | 7.00  | #NULL! | 33.00 | #NULL! | 2 | 2.00   | 28.00  | 20.00  | 26.00  |
| 3.00  | 15.00 | 6.67  | #NULL! | 10.00 | #NULL! | 2 | 2.00   | 12.00  | 12.00  | 27.00  |
| 11.00 | 7.00  | 6.23  | #NULL! | 21.00 | #NULL! | 2 | 2.00   | 10.00  | 3.00   | 30.00  |
| 8.00  | 18.00 | 5.50  | #NULL! | 19.00 | #NULL! | 2 | 2.00   | 20.00  | 20.00  | 27.00  |
| 9.00  | 3.00  | 5.63  | #NULL! | 12.00 | #NULL! | 2 | 2.00   | 24.00  | 4.00   | 38.00  |
| 8.00  | 11.00 | 5.83  | #NULL! | 35.00 | #NULL! | 2 | 1.00   | #NULL! | #NULL! | 21.00  |
| 34.00 | 17.00 | 7.35  | #NULL! | 50.00 | #NULL! | 2 | 1.00   | #NULL! | #NULL! | 14.00  |
| 31.00 | 36.00 | 10.91 | #NULL! | 52.00 | #NULL! | 2 | 1.00   | #NULL! | #NULL! | 4.00   |
| 27.00 | 19.00 | 9.09  | #NULL! | 43.00 | #NULL! | 2 | 1.00   | #NULL! | #NULL! | 4.00   |
| 21.00 | 27.00 | 10.14 | #NULL! | 42.00 | #NULL! | 2 | 1.00   | #NULL! | #NULL! | 17.00  |
| 21.00 | 29.00 | 5.87  | 2.07   | 24.00 | #NULL! | 2 | 2.00   | 37.00  | 10.00  | 37.00  |
| 1.00  | 15.00 | 6.85  | 1.65   | 30.00 | #NULL! | 2 | 2.00   | 40.00  | 10.00  | 39.00  |
| 10.00 | 18.00 | 6.35  | 2.19   | 25.00 | #NULL! | 2 | 1.00   | #NULL! | #NULL! | 15.00  |
| 31.00 | 21.00 | 9.30  | 2.43   | 35.00 | #NULL! | 2 | 2.00   | 10.00  | 10.00  | 13.00  |
| 16.00 | 23.00 | 7.83  | .90    | 28.00 | #NULL! | 2 | 2.00   | 20.00  | 6.00   | 30.00  |
| 21.00 | 12.00 | 4.84  | 1.28   | 40.00 | #NULL! | 2 | 1.00   | #NULL! | #NULL! | 17.00  |
| 2.00  | 20.00 | 7.53  | 1.16   | 13.00 | #NULL! | 2 | 2.00   | 35.00  | 5.00   | 35.00  |
| 27.00 | 17.00 | 9.44  | 2.27   | 42.00 | #NULL! | 2 | #NULL! | #NULL! | #NULL! | #NULL! |
| 11.00 | 7.00  | 9.86  | 1.95   | 33.00 | #NULL! | 2 | 1.00   | #NULL! | #NULL! | 1.00   |
| 12.00 | 15.00 | 7.46  | -.19   | 46.00 | #NULL! | 2 | 1.00   | #NULL! | #NULL! | 27.00  |
| 16.00 | 15.00 | 10.46 | 1.91   | 45.00 | #NULL! | 2 | #NULL! | #NULL! | #NULL! | #NULL! |
| 7.00  | 18.00 | 10.20 | 2.29   | 38.00 | #NULL! | 2 | 1.00   | #NULL! | #NULL! | 3.00   |
| 18.00 | 15.00 | 10.39 | 1.39   | 40.00 | #NULL! | 2 | #NULL! | #NULL! | #NULL! | #NULL! |
| 23.00 | 21.00 | 8.49  | 1.25   | 45.00 | #NULL! | 2 | #NULL! | #NULL! | #NULL! | #NULL! |
| 9.00  | 11.00 | 6.53  | 1.29   | 40.00 | #NULL! | 2 | 1.00   | #NULL! | #NULL! | 24.00  |
| 11.00 | 18.00 | 6.20  | 1.77   | 36.00 | #NULL! | 2 | 1.00   | #NULL! | #NULL! | 19.00  |
| 18.00 | 18.00 | 8.87  | 1.37   | 35.00 | #NULL! | 2 | 1.00   | #NULL! | #NULL! | 22.00  |
| 19.00 | 23.00 | 7.18  | 1.42   | 35.00 | 5      | 1 | 1.00   | #NULL! | #NULL! | 36.00  |
| 15.00 | 15.00 | 7.81  | 2.13   | 12.00 | #NULL! | 2 | 1.00   | #NULL! | #NULL! | 16.00  |
| 6.00  | 3.00  | 6.91  | .47    | 40.00 | #NULL! | 2 | 1.00   | #NULL! | #NULL! | 29.00  |
| 19.00 | 14.00 | 7.70  | 1.53   | 11.00 | 4      | 1 | 1.00   | #NULL! | #NULL! | 12.00  |
| 8.00  | 9.00  | 8.01  | .84    | 20.00 | #NULL! | 2 | 2.00   | 45.00  | #NULL! | 29.00  |
| 10.00 | 10.00 | 8.38  | .30    | 20.00 | #NULL! | 2 | 1.00   | #NULL! | #NULL! | 29.00  |
| 20.00 | 18.00 | 5.72  | 1.18   | 41.00 | #NULL! | 2 | 2.00   | 30.00  | 6.00   | 31.00  |
| 9.00  | 6.00  | 4.17  | .03    | 37.00 | #NULL! | 2 | 2.00   | 21.00  | 10.00  | 40.00  |
| 9.00  | 17.00 | 7.59  | 1.63   | 41.00 | #NULL! | 2 | #NULL! | #NULL! | #NULL! | #NULL! |
| 25.00 | 19.00 | 5.23  | 1.72   | 41.00 | #NULL! | 2 | 2.00   | 39.00  | 3.00   | 21.00  |
| 30.00 | 28.00 | 7.13  | 1.25   | 60.00 | #NULL! | 2 | 1.00   | #NULL! | #NULL! | 28.00  |
| 8.00  | 6.00  | 4.77  | 1.04   | 13.00 | #NULL! | 2 | 2.00   | 30.00  | 10.00  | 31.00  |
| 15.00 | 22.00 | 6.94  | 2.01   | 26.00 | #NULL! | 2 | 2.00   | 20.00  | 10.00  | 20.00  |
| 7.00  | 12.00 | 9.74  | 1.53   | 43.00 | #NULL! | 2 | 1.00   | #NULL! | #NULL! | 29.00  |
| 26.00 | 23.00 | 8.08  | 1.37   | 45.00 | #NULL! | 2 | 1.00   | #NULL! | #NULL! | 24.00  |
| 8.00  | 22.00 | 6.64  | 1.43   | 45.00 | #NULL! | 2 | 1.00   | #NULL! | #NULL! | 26.00  |

|       |       |       |      |       |        |   |        |        |        |        |
|-------|-------|-------|------|-------|--------|---|--------|--------|--------|--------|
| 16.00 | 13.00 | 9.70  | 1.80 | 47.00 | #NULL! | 2 | 1.00   | #NULL! | #NULL! | 36.00  |
| 16.00 | 22.00 | 7.56  | 1.72 | 45.00 | 6      | 1 | 1.00   | #NULL! | #NULL! | 21.00  |
| 17.00 | 12.00 | 7.91  | 1.13 | 27.00 | 4      | 1 | 1.00   | #NULL! | #NULL! | 21.00  |
| 7.00  | 4.00  | 7.31  | 1.34 | 30.00 | #NULL! | 2 | 1.00   | #NULL! | #NULL! | 13.00  |
| 20.00 | 14.00 | 6.74  | .28  | 10.00 | #NULL! | 2 | 1.00   | #NULL! | #NULL! | 21.00  |
| 23.00 | 21.00 | 6.25  | 2.00 | 40.00 | 3      | 1 | 1.00   | #NULL! | #NULL! | 15.00  |
| 15.00 | 16.00 | 9.93  | 2.20 | 30.00 | #NULL! | 2 | 1.00   | #NULL! | #NULL! | 25.00  |
| 11.00 | 18.00 | 8.61  | 2.53 | 13.00 | #NULL! | 2 | #NULL! | #NULL! | #NULL! | #NULL! |
| 23.00 | 22.00 | 9.12  | 2.15 | 57.00 | #NULL! | 2 | 1.00   | #NULL! | #NULL! | 14.00  |
| 4.00  | 9.00  | 10.03 | 1.04 | 34.00 | #NULL! | 2 | 1.00   | #NULL! | #NULL! | 15.00  |
| 14.00 | 15.00 | 7.95  | .31  | 25.00 | #NULL! | 2 | 2.00   | #NULL! | 20.00  | 11.00  |
| 4.00  | 7.00  | 4.16  | .63  | 21.00 | #NULL! | 2 | 2.00   | 28.00  | 9.00   | 29.00  |
| 4.00  | 16.00 | 6.94  | 1.21 | 27.00 | #NULL! | 2 | 1.00   | #NULL! | #NULL! | 32.00  |
| 19.00 | 22.00 | 4.67  | 2.02 | 30.00 | #NULL! | 2 | 2.00   | #NULL! | #NULL! | 23.00  |
| 13.00 | 21.00 | 8.15  | 1.68 | 43.00 | #NULL! | 2 | 2.00   | 20.00  | 10.00  | 24.00  |
| .00   | 10.00 | 4.57  | 1.31 | 27.00 | #NULL! | 2 | 2.00   | 36.00  | 4.00   | 36.00  |
| 31.00 | 23.00 | 6.33  | 2.09 | 47.00 | #NULL! | 2 | 2.00   | 20.00  | 3.00   | 19.00  |
| 12.00 | 24.00 | 7.22  | 1.93 | 21.00 | #NULL! | 2 | 2.00   | 12.00  | #NULL! | 35.00  |
| 7.00  | 15.00 | 8.09  | 1.48 | 30.00 | #NULL! | 2 | 2.00   | 41.00  | 5.00   | 42.00  |
| 23.00 | 23.00 | 8.23  | 1.31 | 33.00 | #NULL! | 2 | 1.00   | #NULL! | #NULL! | 3.00   |
| 9.00  | 15.00 | 5.94  | -.07 | 26.00 | 4      | 1 | 2.00   | 42.00  | 7.00   | 37.00  |
| 8.00  | 19.00 | 8.15  | .86  | 29.00 | #NULL! | 2 | 2.00   | 2.00   | 5.00   | 33.00  |
| 2.00  | 18.00 | 5.44  | .40  | 6.00  | #NULL! | 2 | 2.00   | 34.00  | 3.00   | 32.00  |
| 14.00 | 17.00 | 7.19  | .55  | 15.00 | 3      | 1 | 2.00   | 26.00  | 8.00   | 25.00  |
| 17.00 | 8.00  | 8.25  | 1.71 | 13.00 | #NULL! | 2 | 2.00   | 36.00  | 10.00  | 30.00  |
| 7.00  | 24.00 | 8.05  | 1.80 | 40.00 | #NULL! | 2 | 1.00   | #NULL! | #NULL! | 24.00  |
| 8.00  | 7.00  | 5.05  | 1.60 | 29.00 | #NULL! | 2 | 1.00   | #NULL! | #NULL! | 14.00  |
| 16.00 | 35.00 | 8.92  | 1.56 | 50.00 | #NULL! | 2 | 1.00   | #NULL! | #NULL! | 38.00  |
| 27.00 | 12.00 | 9.60  | 1.05 | 38.00 | #NULL! | 2 | 1.00   | #NULL! | #NULL! | 17.00  |
| 6.00  | 15.00 | 9.66  | .45  | 23.00 | #NULL! | 2 | 1.00   | #NULL! | #NULL! | 15.00  |
| 14.00 | 4.00  | 6.65  | 1.78 | 49.00 | #NULL! | 2 | 2.00   | 20.00  | 2.00   | 33.00  |
| 26.00 | 18.00 | 4.59  | 1.50 | 40.00 | #NULL! | 2 | 1.00   | #NULL! | #NULL! | 31.00  |
| 14.00 | 21.00 | 10.62 | 1.72 | 30.00 | #NULL! | 2 | #NULL! | #NULL! | #NULL! | #NULL! |
| 2.00  | 10.00 | 8.16  | .93  | 17.00 | #NULL! | 2 | 1.00   | #NULL! | #NULL! | 27.00  |
| 9.00  | 10.00 | 6.72  | .98  | 37.00 | 5      | 1 | 1.00   | #NULL! | #NULL! | 23.00  |
| 15.00 | 11.00 | 4.66  | .09  | 14.00 | #NULL! | 2 | 1.00   | #NULL! | #NULL! | 23.00  |
| 22.00 | 12.00 | 7.10  | 1.49 | 45.00 | #NULL! | 2 | 1.00   | #NULL! | #NULL! | 10.00  |
| 31.00 | 14.00 | 6.11  | .90  | 30.00 | #NULL! | 2 | 1.00   | #NULL! | #NULL! | 16.00  |
| 28.00 | 20.00 | 8.32  | 2.88 | 42.00 | #NULL! | 2 | 2.00   | 20.00  | 10.00  | 13.00  |
| 11.00 | 19.00 | 8.15  | 1.93 | 29.00 | #NULL! | 2 | 2.00   | 4.00   | 10.00  | 1.00   |
| 11.00 | 21.00 | 7.52  | 1.72 | 29.00 | #NULL! | 2 | 1.00   | #NULL! | #NULL! | 38.00  |
| 29.00 | 25.00 | 7.88  | 3.36 | 36.00 | #NULL! | 2 | 2.00   | 10.00  | 20.00  | 22.00  |
| 7.00  | 11.00 | 6.16  | 1.15 | 33.00 | #NULL! | 2 | 1.00   | #NULL! | #NULL! | 41.00  |
| 26.00 | 14.00 | 7.08  | 2.56 | 39.00 | #NULL! | 2 | #NULL! | #NULL! | #NULL! | #NULL! |
| 12.00 | 14.00 | 8.34  | .55  | 31.00 | 4      | 1 | 1.00   | #NULL! | #NULL! | 7.00   |
| 30.00 | 6.00  | 6.64  | .72  | 41.00 | #NULL! | 2 | #NULL! | #NULL! | #NULL! | #NULL! |
| 11.00 | 14.00 | 7.87  | 1.29 | 39.00 | 6      | 1 | 1.00   | #NULL! | #NULL! | 6.00   |
| 20.00 | 15.00 | 7.14  | 1.72 | 45.00 | #NULL! | 2 | 1.00   | #NULL! | #NULL! | 29.00  |
| 14.00 | 13.00 | 4.77  | 1.18 | 35.00 | #NULL! | 2 | 1.00   | #NULL! | #NULL! | 22.00  |
| 26.00 | 16.00 | 9.33  | 1.46 | 24.00 | #NULL! | 2 | 1.00   | #NULL! | #NULL! | 8.00   |
| 18.00 | 15.00 | 7.31  | .93  | 14.00 | #NULL! | 2 | 1.00   | #NULL! | #NULL! | 32.00  |
| 18.00 | 23.00 | 6.60  | -.06 | 20.00 | #NULL! | 2 | #NULL! | #NULL! | #NULL! | #NULL! |
| 17.00 | 19.00 | 5.77  | 1.45 | 25.00 | #NULL! | 2 | 1.00   | #NULL! | #NULL! | 24.00  |
| 14.00 | 15.00 | 8.91  | .88  | 10.00 | #NULL! | 2 | #NULL! | #NULL! | #NULL! | #NULL! |
| 28.00 | 16.00 | 7.45  | 2.67 | 45.00 | #NULL! | 2 | 2.00   | 20.00  | 5.00   | 12.00  |
| 13.00 | 24.00 | 8.66  | .91  | 37.00 | 5      | 1 | 2.00   | 33.00  | 8.00   | 23.00  |
| 19.00 | 17.00 | 6.29  | 2.47 | 56.00 | #NULL! | 2 | 1.00   | #NULL! | #NULL! | 9.00   |
| 22.00 | 27.00 | 7.69  | 1.70 | 21.00 | #NULL! | 2 | 1.00   | #NULL! | #NULL! | 7.00   |
| 18.00 | 20.00 | 4.31  | 1.51 | 36.00 | #NULL! | 2 | 1.00   | #NULL! | #NULL! | 39.00  |
| 10.00 | 9.00  | 5.79  | .98  | 25.00 | #NULL! | 2 | 1.00   | #NULL! | #NULL! | 19.00  |
| 11.00 | 37.00 | 9.78  | 2.03 | 44.00 | #NULL! | 2 | 1.00   | #NULL! | #NULL! | 33.00  |
| 13.00 | 16.00 | 7.22  | .76  | 12.00 | #NULL! | 2 | 2.00   | 25.00  | 10.00  | 23.00  |

|       |       |       |      |       |        |   |        |        |        |        |
|-------|-------|-------|------|-------|--------|---|--------|--------|--------|--------|
| 28.00 | 17.00 | 6.65  | 2.99 | 46.00 | #NULL! | 2 | 1.00   | #NULL! | #NULL! | 22.00  |
| 11.00 | 17.00 | 4.31  | -.40 | 27.00 | #NULL! | 2 | 2.00   | 20.00  | 13.00  | 22.00  |
| 10.00 | 22.00 | 4.04  | .50  | 20.00 | #NULL! | 2 | 1.00   | #NULL! | #NULL! | 20.00  |
| 30.00 | 23.00 | 5.93  | 2.01 | 27.00 | #NULL! | 2 | 1.00   | #NULL! | #NULL! | 14.00  |
| 11.00 | 12.00 | 5.82  | 1.04 | 39.00 | #NULL! | 2 | 2.00   | 10.00  | 20.00  | 28.00  |
| 25.00 | 29.00 | 10.46 | 2.60 | 68.00 | #NULL! | 2 | 2.00   | 8.00   | 5.00   | 14.00  |
| 8.00  | 13.00 | 4.54  | .08  | 40.00 | #NULL! | 2 | 2.00   | 18.00  | 24.00  | 12.00  |
| 20.00 | 14.00 | 10.23 | 3.27 | 41.00 | #NULL! | 2 | 2.00   | 18.00  | 25.00  | 20.00  |
| 8.00  | 16.00 | 6.36  | 1.15 | 36.00 | #NULL! | 2 | 2.00   | 20.00  | 10.00  | 13.00  |
| 2.00  | 23.00 | 9.11  | 1.11 | 18.00 | 4      | 1 | 2.00   | 20.00  | 25.00  | 23.00  |
| 23.00 | 27.00 | 4.24  | 2.80 | 38.00 | #NULL! | 2 | 1.00   | #NULL! | #NULL! | 29.00  |
| 8.00  | 33.00 | 7.00  | 2.22 | 38.00 | #NULL! | 2 | 2.00   | 38.00  | 10.00  | 35.00  |
| 6.00  | 30.00 | 6.56  | 1.60 | 38.00 | #NULL! | 2 | 2.00   | 28.00  | 30.00  | 35.00  |
| 28.00 | 20.00 | 9.65  | 3.02 | 50.00 | #NULL! | 2 | 2.00   | 3.00   | 15.00  | 10.00  |
| 21.00 | 17.00 | 7.20  | .92  | 44.00 | #NULL! | 2 | #NULL! | #NULL! | #NULL! | 16.00  |
| 29.00 | 28.00 | 8.10  | 1.99 | 36.00 | #NULL! | 2 | #NULL! | #NULL! | #NULL! | 7.00   |
| 24.00 | 20.00 | 8.62  | 2.54 | 18.00 | 3      | 1 | #NULL! | #NULL! | #NULL! | 14.00  |
| 19.00 | 24.00 | 12.06 | 1.07 | 35.00 | #NULL! | 2 | #NULL! | #NULL! | #NULL! | #NULL! |
| 27.00 | 18.00 | 8.02  | 2.93 | 65.00 | #NULL! | 2 | #NULL! | #NULL! | #NULL! | #NULL! |
| 11.00 | 7.00  | 4.92  | .49  | 26.00 | #NULL! | 2 | 1.00   | #NULL! | #NULL! | 36.00  |
| 18.00 | 21.00 | 6.57  | 1.23 | 37.00 | #NULL! | 2 | 1.00   | #NULL! | #NULL! | 7.00   |
| 9.00  | 18.00 | 8.43  | 1.10 | 48.00 | #NULL! | 2 | 1.00   | #NULL! | #NULL! | 33.00  |
| 7.00  | 10.00 | 5.80  | .06  | 10.00 | #NULL! | 2 | 1.00   | #NULL! | #NULL! | 18.00  |
| 6.00  | 21.00 | 9.24  | 1.09 | 28.00 | #NULL! | 2 | 1.00   | #NULL! | #NULL! | 37.00  |
| 10.00 | 10.00 | 8.46  | 1.47 | 39.00 | #NULL! | 2 | 1.00   | #NULL! | #NULL! | 26.00  |
| 33.00 | 19.00 | 10.40 | 2.31 | 48.00 | #NULL! | 2 | 1.00   | #NULL! | #NULL! | 1.00   |
| 29.00 | 29.00 | 8.67  | 3.46 | 53.00 | #NULL! | 2 | #NULL! | #NULL! | #NULL! | #NULL! |
| 7.00  | 15.00 | 7.92  | .83  | 29.00 | #NULL! | 2 | #NULL! | #NULL! | #NULL! | #NULL! |
| 10.00 | 18.00 | 7.98  | 1.13 | 29.00 | #NULL! | 2 | 1.00   | #NULL! | #NULL! | 37.00  |
| 33.00 | 30.00 | 10.65 | 2.86 | 61.00 | #NULL! | 2 | #NULL! | #NULL! | #NULL! | #NULL! |
| 14.00 | 10.00 | 3.36  | .98  | 40.00 | #NULL! | 2 | 2.00   | 10.00  | 10.00  | 14.00  |
| 12.00 | 14.00 | 5.86  | 1.29 | 40.00 | #NULL! | 2 | 2.00   | 10.00  | 10.00  | 22.00  |
| 16.00 | 23.00 | 7.91  | 1.54 | 20.00 | #NULL! | 2 | 2.00   | 10.00  | 10.00  | 29.00  |
| 12.00 | 25.00 | 11.05 | 1.29 | 22.00 | #NULL! | 2 | 2.00   | 10.00  | 10.00  | 32.00  |
| 8.00  | 16.00 | 5.96  | .68  | 22.00 | #NULL! | 2 | 2.00   | 10.00  | 10.00  | 24.00  |
| 13.00 | 9.00  | 6.20  | .59  | 35.00 | #NULL! | 2 | 2.00   | 10.00  | 10.00  | 21.00  |
| 27.00 | 21.00 | 10.55 | 2.84 | 50.00 | #NULL! | 2 | 2.00   | 10.00  | 10.00  | 1.00   |
| 15.00 | 27.00 | 9.55  | 2.35 | 52.00 | #NULL! | 2 | 2.00   | 10.00  | 10.00  | 36.00  |
| 4.00  | 13.00 | 8.92  | 1.71 | 13.00 | 4      | 1 | 2.00   | 30.00  | 20.00  | 22.00  |
| 10.00 | 12.00 | 10.25 | .63  | 20.00 | #NULL! | 2 | 2.00   | 40.00  | 20.00  | 36.00  |
| 4.00  | 18.00 | 6.22  | .29  | 18.00 | #NULL! | 2 | 2.00   | 10.00  | 10.00  | 40.00  |
| 31.00 | 19.00 | 6.99  | 1.86 | 18.00 | #NULL! | 2 | 2.00   | 10.00  | 10.00  | 21.00  |
| 9.00  | 13.00 | 7.89  | 2.41 | 39.00 | #NULL! | 2 | 2.00   | 30.00  | 20.00  | 31.00  |
| 9.00  | 14.00 | 6.48  | 1.24 | 39.00 | #NULL! | 2 | 2.00   | 10.00  | 10.00  | 30.00  |
| 6.00  | 10.00 | 6.34  | .80  | 4.00  | #NULL! | 2 | 2.00   | 10.00  | 10.00  | 23.00  |
| 27.00 | 20.00 | 9.37  | 1.19 | 31.00 | #NULL! | 2 | 2.00   | 10.00  | 10.00  | 22.00  |
| 10.00 | 13.00 | 9.36  | 1.96 | 42.00 | #NULL! | 2 | 1.00   | #NULL! | #NULL! | 31.00  |
| 16.00 | 19.00 | 11.59 | 2.46 | 50.00 | #NULL! | 2 | #NULL! | #NULL! | #NULL! | #NULL! |
| 29.00 | 28.00 | 6.18  | 3.41 | 35.00 | #NULL! | 2 | 2.00   | 10.00  | 15.00  | 22.00  |
| 18.00 | 27.00 | 6.21  | 2.47 | 20.00 | #NULL! | 2 | 1.00   | #NULL! | #NULL! | 30.00  |
| 26.00 | 19.00 | 8.15  | 1.36 | 42.00 | 4      | 1 | 2.00   | 25.00  | 10.00  | 28.00  |
| 11.00 | 17.00 | 8.81  | 1.39 | 34.00 | #NULL! | 2 | #NULL! | #NULL! | #NULL! | #NULL! |
| 17.00 | 13.00 | 11.30 | 1.71 | 36.00 | #NULL! | 2 | 1.00   | #NULL! | #NULL! | 36.00  |
| 14.00 | 17.00 | 8.07  | 1.75 | 39.00 | #NULL! | 2 | 1.00   | #NULL! | #NULL! | 34.00  |
| 16.00 | 5.00  | 8.45  | 1.19 | 31.00 | #NULL! | 2 | 2.00   | 29.00  | 2.00   | 31.00  |
| 35.00 | 22.00 | 11.50 | 2.55 | 23.00 | #NULL! | 2 | #NULL! | #NULL! | #NULL! | #NULL! |
| 17.00 | 15.00 | 8.64  | 2.20 | 44.00 | #NULL! | 2 | 2.00   | 15.00  | 12.00  | 20.00  |
| 10.00 | 19.00 | 7.33  | 1.15 | 8.00  | 4      | 1 | 1.00   | #NULL! | #NULL! | 37.00  |
| 12.00 | 15.00 | 7.53  | 1.41 | 21.00 | #NULL! | 2 | 1.00   | #NULL! | #NULL! | 24.00  |
| 14.00 | 9.00  | 7.55  | 1.06 | 44.00 | 3      | 1 | 1.00   | #NULL! | #NULL! | 27.00  |
| 20.00 | 16.00 | 5.35  | 1.05 | 10.00 | #NULL! | 2 | 2.00   | 17.00  | 10.00  | 17.00  |
| 12.00 | 26.00 | 6.47  | 1.39 | 26.00 | #NULL! | 2 | 2.00   | 30.00  | 10.00  | 37.00  |

|       |       |       |      |       |        |   |      |        |        |       |
|-------|-------|-------|------|-------|--------|---|------|--------|--------|-------|
| 17.00 | 13.00 | 9.41  | 1.23 | 20.00 | #NULL! | 2 | 2.00 | 30.00  | 15.00  | 31.00 |
| 5.00  | 15.00 | 5.79  | .49  | 15.00 | 4      | 1 | 1.00 | #NULL! | #NULL! | 25.00 |
| 28.00 | 25.00 | 7.56  | 1.66 | 29.00 | #NULL! | 2 | 2.00 | 15.00  | 8.00   | 15.00 |
| 12.00 | 19.00 | 7.07  | 2.14 | 39.00 | #NULL! | 2 | 2.00 | 5.00   | 5.00   | 1.00  |
| 21.00 | 23.00 | 8.69  | 2.99 | 35.00 | #NULL! | 2 | 2.00 | 10.00  | 10.00  | 15.00 |
| 16.00 | 10.00 | 7.17  | 1.46 | 39.00 | #NULL! | 2 | 2.00 | 10.00  | 10.00  | 22.00 |
| 7.00  | 15.00 | 7.18  | .98  | 28.00 | #NULL! | 2 | 2.00 | 10.00  | 10.00  | 24.00 |
| 13.00 | 13.00 | 8.02  | 1.94 | 31.00 | #NULL! | 2 | 2.00 | 22.00  | 8.00   | 24.00 |
| 8.00  | 25.00 | 5.37  | .99  | 46.00 | #NULL! | 2 | 2.00 | 10.00  | 10.00  | 37.00 |
| 34.00 | 17.00 | 7.09  | 3.10 | 48.00 | #NULL! | 2 | 1.00 | #NULL! | #NULL! | 8.00  |
| 14.00 | 12.00 | 9.54  | 1.49 | 44.00 | #NULL! | 2 | 1.00 | #NULL! | #NULL! | 18.00 |
| 5.00  | 18.00 | 6.44  | 2.23 | 42.00 | #NULL! | 2 | 2.00 | 30.00  | 15.00  | 26.00 |
| 18.00 | 27.00 | 11.98 | 1.48 | 40.00 | #NULL! | 2 | 1.00 | #NULL! | #NULL! | 16.00 |
| 10.00 | 24.00 | 8.65  | 2.07 | 43.00 | 3      | 1 | 2.00 | 18.00  | 20.00  | 20.00 |
| 13.00 | 43.00 | 8.48  | 2.85 | 31.00 | #NULL! | 2 | 2.00 | 18.00  | 10.00  | 27.00 |
| 23.00 | 28.00 | 10.03 | 2.38 | 39.00 | #NULL! | 2 | 2.00 | 10.00  | 12.00  | 18.00 |
| 7.00  | 21.00 | 7.28  | 1.63 | 24.00 | #NULL! | 2 | 1.00 | #NULL! | #NULL! | 19.00 |
| 13.00 | 30.00 | 10.70 | 3.05 | 40.00 | #NULL! | 2 | 1.00 | #NULL! | #NULL! | 16.00 |
| 7.00  | 17.00 | 7.55  | 2.99 | 41.00 | #NULL! | 2 | 2.00 | 37.00  | 15.00  | 35.00 |
| 24.00 | 23.00 | 8.80  | 1.88 | 39.00 | 5      | 1 | 1.00 | #NULL! | #NULL! | 14.00 |
| 21.00 | 18.00 | 8.73  | 1.60 | 43.00 | 5      | 1 | 2.00 | 26.00  | 1.00   | 22.00 |
| 24.00 | 16.00 | 8.24  | 1.12 | 34.00 | #NULL! | 2 | 2.00 | 20.00  | 6.00   | 15.00 |
| 2.00  | 8.00  | 6.29  | 1.22 | .00   | #NULL! | 2 | 2.00 | 35.00  | 10.00  | 33.00 |



| Age of onset | Time of first treatment | Time of hospitalization | Number of hospitalizations | ANSS score | Positive score | Negative score | Pathology of PANSS |
|--------------|-------------------------|-------------------------|----------------------------|------------|----------------|----------------|--------------------|
| 22.00        | 22.00                   | 22.00                   | 3.00                       | 70.00      | 12.00          | 20.00          | 32.00              |
| 22.00        | 29.00                   | 29.00                   | 3.00                       | 63.00      | 8.00           | 22.00          | 28.00              |
| 21.00        | 21.00                   | 21.00                   | 5.00                       | 89.00      | 23.00          | 26.00          | 35.00              |
| 23.00        | 23.00                   | 23.00                   | 7.00                       | 51.00      | 7.00           | 19.00          | 22.00              |
| 25.00        | 30.00                   | 30.00                   | 9.00                       | 68.00      | 9.00           | 24.00          | 28.00              |
| 18.00        | 31.00                   | 31.00                   | 2.00                       | 79.00      | 7.00           | 25.00          | 38.00              |
| 19.00        | 19.00                   | 19.00                   | 4.00                       | 90.00      | 9.00           | 31.00          | 43.00              |
| 19.00        | 22.00                   | 22.00                   | 5.00                       | 74.00      | 11.00          | 25.00          | 33.00              |
| 23.00        | 23.00                   | 23.00                   | 7.00                       | 66.00      | 9.00           | 29.00          | 25.00              |
| 25.00        | 25.00                   | 25.00                   | 6.00                       | 62.00      | 11.00          | 25.00          | 23.00              |
| #NULL!       | 33.00                   | 33.00                   | 4.00                       | 68.00      | 13.00          | 26.00          | 25.00              |
| 22.00        | 22.00                   | 22.00                   | 6.00                       | 66.00      | 11.00          | 21.00          | 30.00              |
| 28.00        | 28.00                   | 28.00                   | 4.00                       | 89.00      | 17.00          | 23.00          | 41.00              |
| 25.00        | 28.00                   | 28.00                   | 4.00                       | 59.00      | 9.00           | 20.00          | 26.00              |
| 17.00        | 17.00                   | 20.00                   | 1.00                       | 76.00      | 21.00          | 20.00          | 29.00              |
| 18.00        | 18.00                   | 18.00                   | 4.00                       | 51.00      | 8.00           | 13.00          | 27.00              |
| 20.00        | 20.00                   | 38.00                   | 5.00                       | 61.00      | 10.00          | 24.00          | 24.00              |
| 30.00        | 30.00                   | 30.00                   | 3.00                       | 82.00      | 18.00          | 28.00          | 33.00              |
| 25.00        | 26.00                   | 26.00                   | 6.00                       | 93.00      | 22.00          | 25.00          | 41.00              |
| 29.00        | 29.00                   | 37.00                   | 8.00                       | 80.00      | 9.00           | 29.00          | 36.00              |
| 28.00        | 33.00                   | 33.00                   | 1.00                       | 86.00      | 18.00          | 25.00          | 39.00              |
| 28.00        | 36.00                   | 36.00                   | 3.00                       | 68.00      | 17.00          | 21.00          | 27.00              |
| 40.00        | 40.00                   | 40.00                   | 1.00                       | 48.00      | 9.00           | 12.00          | 24.00              |
| 26.00        | 26.00                   | #NULL!                  | 4.00                       | 69.00      | 26.00          | 12.00          | 28.00              |
| 17.00        | 17.00                   | 17.00                   | 2.00                       | 76.00      | 23.00          | 11.00          | 35.00              |
| 18.00        | 35.00                   | 35.00                   | 4.00                       | 59.00      | 15.00          | 18.00          | 23.00              |
| 19.00        | 19.00                   | 19.00                   | 3.00                       | 96.00      | 19.00          | 33.00          | 41.00              |
| 27.00        | 27.00                   | 27.00                   | 2.00                       | 77.00      | 21.00          | 15.00          | 35.00              |
| 27.00        | 27.00                   | 27.00                   | 2.00                       | 84.00      | 25.00          | 13.00          | 40.00              |
| 22.00        | 24.00                   | 24.00                   | 4.00                       | 53.00      | 17.00          | 7.00           | 26.00              |
| 17.00        | 17.00                   | 17.00                   | 5.00                       | 44.00      | 7.00           | 10.00          | 24.00              |
| 21.00        | 21.00                   | 21.00                   | 4.00                       | 43.00      | 7.00           | 10.00          | 23.00              |
| 21.00        | 21.00                   | 21.00                   | 3.00                       | 96.00      | 27.00          | 21.00          | 36.00              |
| 44.00        | 44.00                   | 44.00                   | 3.00                       | 68.00      | 19.00          | 8.00           | 38.00              |
| 16.00        | 16.00                   | 21.00                   | 2.00                       | 38.00      | 11.00          | 7.00           | 17.00              |
| 19.00        | 19.00                   | 20.00                   | 13.00                      | 48.00      | 13.00          | 14.00          | 18.00              |
| 22.00        | 31.00                   | 31.00                   | 4.00                       | 62.00      | 17.00          | 13.00          | 29.00              |
| 22.00        | 22.00                   | 25.00                   | 4.00                       | 67.00      | 21.00          | 14.00          | 29.00              |
| 22.00        | 22.00                   | 31.00                   | 4.00                       | 46.00      | 10.00          | 12.00          | 21.00              |
| 25.00        | 25.00                   | 25.00                   | 3.00                       | 40.00      | 9.00           | 10.00          | 17.00              |
| 19.00        | 23.00                   | 23.00                   | 4.00                       | 54.00      | 13.00          | 14.00          | 24.00              |
| 25.00        | 25.00                   | 25.00                   | 3.00                       | 52.00      | 13.00          | 15.00          | 21.00              |
| 20.00        | 20.00                   | 20.00                   | 4.00                       | 69.00      | 15.00          | 14.00          | 32.00              |
| 20.00        | 20.00                   | 20.00                   | 5.00                       | 63.00      | 13.00          | 17.00          | 30.00              |
| 20.00        | 20.00                   | 20.00                   | 5.00                       | 65.00      | 16.00          | 18.00          | 28.00              |
| 29.00        | 41.00                   | 44.00                   | 2.00                       | 46.00      | 8.00           | 16.00          | 19.00              |
| 19.00        | 25.00                   | 25.00                   | 8.00                       | 62.00      | 15.00          | 19.00          | 25.00              |
| 29.00        | #NULL!                  | #NULL!                  | #NULL!                     | 55.00      | 17.00          | 13.00          | 22.00              |
| 20.00        | 20.00                   | 40.00                   | 1.00                       | 59.00      | 15.00          | 15.00          | 26.00              |
| 27.00        | 27.00                   | 27.00                   | 3.00                       | 56.00      | 16.00          | 12.00          | 25.00              |
| 20.00        | 21.00                   | 21.00                   | 3.00                       | 62.00      | 12.00          | 19.00          | 28.00              |
| 17.00        | 18.00                   | 21.00                   | 1.00                       | 50.00      | 10.00          | 17.00          | 20.00              |
| 16.00        | 16.00                   | 20.00                   | 1.00                       | 76.00      | 16.00          | 22.00          | 29.00              |
| 25.00        | 26.00                   | 26.00                   | 2.00                       | 43.00      | 8.00           | 14.00          | 18.00              |
| 21.00        | 21.00                   | 21.00                   | 4.00                       | 55.00      | 13.00          | 16.00          | 23.00              |
| 13.00        | 13.00                   | 41.00                   | 1.00                       | 46.00      | 9.00           | 13.00          | 21.00              |
| 28.00        | 29.00                   | 29.00                   | 2.00                       | 55.00      | 9.00           | 17.00          | 26.00              |
| 20.00        | 20.00                   | 20.00                   | 2.00                       | 58.00      | 15.00          | 16.00          | 24.00              |
| 26.00        | 30.00                   | 30.00                   | 5.00                       | 55.00      | 16.00          | 13.00          | 23.00              |
| 31.00        | 35.00                   | 35.00                   | 4.00                       | 50.00      | 8.00           | 18.00          | 21.00              |
| 32.00        | 32.00                   | 32.00                   | 5.00                       | 36.00      | 7.00           | 9.00           | 17.00              |

|        |        |        |        |        |        |        |        |
|--------|--------|--------|--------|--------|--------|--------|--------|
| 20.00  | #NULL! | #NULL! | #NULL! | 57.00  | 13.00  | 10.00  | 29.00  |
| 22.00  | 22.00  | 22.00  | 4.00   | 49.00  | 17.00  | 8.00   | 21.00  |
| 33.00  | 36.00  | 36.00  | 8.00   | 44.00  | 7.00   | 14.00  | 20.00  |
| 13.00  | 13.00  | 13.00  | 4.00   | 41.00  | 7.00   | 14.00  | 17.00  |
| 35.00  | 35.00  | 35.00  | 3.00   | 58.00  | 13.00  | 18.00  | 24.00  |
| 37.00  | 37.00  | 37.00  | 4.00   | 44.00  | 10.00  | 12.00  | 19.00  |
| 25.00  | 26.00  | 26.00  | 5.00   | 77.00  | 20.00  | 21.00  | 33.00  |
| 30.00  | 30.00  | 30.00  | 7.00   | 59.00  | 20.00  | 11.00  | 25.00  |
| 34.00  | 35.00  | 35.00  | 5.00   | 51.00  | 8.00   | 14.00  | 26.00  |
| 19.00  | 19.00  | 19.00  | 6.00   | 62.00  | 10.00  | 22.00  | 27.00  |
| 27.00  | 27.00  | 27.00  | 7.00   | 51.00  | 7.00   | 17.00  | 24.00  |
| 19.00  | 19.00  | 19.00  | 4.00   | 48.00  | 7.00   | 19.00  | 19.00  |
| 35.00  | 35.00  | 35.00  | 6.00   | 63.00  | 15.00  | 15.00  | 30.00  |
| 28.00  | 31.00  | 38.00  | 2.00   | 37.00  | 7.00   | 7.00   | 20.00  |
| 26.00  | 26.00  | 26.00  | 5.00   | 64.00  | 17.00  | 12.00  | 31.00  |
| 24.00  | 24.00  | 24.00  | 6.00   | 39.00  | 7.00   | 11.00  | 18.00  |
| 18.00  | 18.00  | 18.00  | 6.00   | 71.00  | 10.00  | 28.00  | 30.00  |
| 24.00  | 24.00  | 25.00  | 3.00   | 61.00  | 17.00  | 16.00  | 25.00  |
| 19.00  | 20.00  | 20.00  | 3.00   | 42.00  | 8.00   | 10.00  | 21.00  |
| 27.00  | 29.00  | 29.00  | 5.00   | 63.00  | 13.00  | 24.00  | 23.00  |
| 19.00  | 19.00  | 19.00  | 3.00   | 52.00  | 7.00   | 21.00  | 21.00  |
| 14.00  | 14.00  | 14.00  | 3.00   | 65.00  | 8.00   | 30.00  | 24.00  |
| 19.00  | 19.00  | 19.00  | 4.00   | 47.00  | 8.00   | 13.00  | 23.00  |
| 22.00  | 22.00  | 22.00  | 5.00   | 52.00  | 7.00   | 21.00  | 21.00  |
| 23.00  | 23.00  | 23.00  | 7.00   | 56.00  | 9.00   | 18.00  | 26.00  |
| 30.00  | 30.00  | 30.00  | 2.00   | 46.00  | 11.00  | 12.00  | 20.00  |
| 24.00  | 28.00  | 28.00  | 1.00   | 59.00  | 19.00  | 7.00   | 30.00  |
| 32.00  | 32.00  | 32.00  | 4.00   | 48.00  | 9.00   | 12.00  | 24.00  |
| 29.00  | 34.00  | 34.00  | 4.00   | 47.00  | 11.00  | 9.00   | 24.00  |
| 20.00  | 20.00  | 20.00  | 2.00   | 57.00  | 10.00  | 20.00  | 24.00  |
| 19.00  | 19.00  | 19.00  | 12.00  | 59.00  | 10.00  | 19.00  | 27.00  |
| 11.00  | 11.00  | 11.00  | 3.00   | 57.00  | 8.00   | 19.00  | 27.00  |
| 24.00  | 24.00  | 24.00  | 12.00  | 60.00  | 13.00  | 16.00  | 28.00  |
| 19.00  | 19.00  | 30.00  | 2.00   | 72.00  | 18.00  | 20.00  | 31.00  |
| 26.00  | 35.00  | 35.00  | 2.00   | 69.00  | 17.00  | 16.00  | 33.00  |
| 24.00  | 24.00  | 24.00  | 7.00   | 61.00  | 9.00   | 23.00  | 26.00  |
| #NULL! | #NULL! | #NULL! | #NULL! | #NULL! | #NULL! | #NULL! | #NULL! |
| 22.00  | 23.00  | 23.00  | 1.00   | 67.00  | 16.00  | 14.00  | 34.00  |
| 32.00  | 32.00  | 32.00  | 5.00   | 60.00  | 14.00  | 15.00  | 28.00  |
| #NULL! | #NULL! | #NULL! | #NULL! | #NULL! | #NULL! | #NULL! | #NULL! |
| 39.00  | 40.00  | 40.00  | 3.00   | 75.00  | 15.00  | 20.00  | 37.00  |
| #NULL! | #NULL! | #NULL! | #NULL! | #NULL! | #NULL! | #NULL! | #NULL! |
| #NULL! | #NULL! | #NULL! | #NULL! | #NULL! | #NULL! | #NULL! | #NULL! |
| 23.00  | 26.00  | 26.00  | 4.00   | 63.00  | 15.00  | 17.00  | 28.00  |
| 39.00  | 53.00  | 53.00  | 2.00   | 57.00  | 15.00  | 14.00  | 25.00  |
| 21.00  | 21.00  | 21.00  | 2.00   | 65.00  | 20.00  | 14.00  | 28.00  |
| 15.00  | 30.00  | 30.00  | 2.00   | 78.00  | 19.00  | 21.00  | 35.00  |
| 20.00  | 20.00  | 35.00  | 2.00   | 68.00  | 17.00  | 23.00  | 25.00  |
| 24.00  | 24.00  | 24.00  | 2.00   | 79.00  | 15.00  | 28.00  | 33.00  |
| 24.00  | 31.00  | 31.00  | 2.00   | 75.00  | 19.00  | 20.00  | 33.00  |
| 24.00  | 24.00  | 26.00  | 5.00   | 71.00  | 19.00  | 13.00  | 34.00  |
| 32.00  | 32.00  | 32.00  | 10.00  | 56.00  | 7.00   | 22.00  | 24.00  |
| 20.00  | 20.00  | 20.00  | 9.00   | 62.00  | 14.00  | 9.00   | 34.00  |
| 19.00  | 19.00  | 19.00  | 5.00   | 53.00  | 7.00   | 22.00  | 21.00  |
| #NULL! | #NULL! | #NULL! | #NULL! | #NULL! | #NULL! | #NULL! | #NULL! |
| 35.00  | 35.00  | 43.00  | 3.00   | 43.00  | 7.00   | 14.00  | 19.00  |
| 23.00  | 23.00  | 29.00  | 3.00   | 45.00  | 7.00   | 15.00  | 20.00  |
| 22.00  | 22.00  | 22.00  | 6.00   | 77.00  | 18.00  | 21.00  | 33.00  |
| 19.00  | 19.00  | 19.00  | 4.00   | 46.00  | 7.00   | 17.00  | 19.00  |
| 18.00  | 18.00  | 22.00  | 3.00   | 63.00  | 13.00  | 17.00  | 28.00  |
| 29.00  | 29.00  | 45.00  | 1.00   | 48.00  | 7.00   | 13.00  | 23.00  |
| 26.00  | 26.00  | 41.00  | 3.00   | 58.00  | 7.00   | 19.00  | 27.00  |

|        |        |        |        |        |        |        |        |
|--------|--------|--------|--------|--------|--------|--------|--------|
| 21.00  | 21.00  | 21.00  | 9.00   | 45.00  | 8.00   | 13.00  | 19.00  |
| 26.00  | 26.00  | 26.00  | 7.00   | 70.00  | 24.00  | 12.00  | 31.00  |
| 23.00  | 23.00  | 28.00  | 3.00   | 94.00  | 24.00  | 22.00  | 43.00  |
| 40.00  | 40.00  | 40.00  | 9.00   | 59.00  | 9.00   | 17.00  | 29.00  |
| 22.00  | 22.00  | 26.00  | 3.00   | 74.00  | 16.00  | 23.00  | 32.00  |
| 34.00  | 34.00  | 40.00  | 4.00   | 67.00  | 23.00  | 11.00  | 28.00  |
| 19.00  | 19.00  | 19.00  | 4.00   | 44.00  | 7.00   | 14.00  | 20.00  |
| #NULL! | #NULL! | #NULL! | #NULL! | #NULL! | #NULL! | #NULL! | #NULL! |
| 29.00  | 29.00  | 29.00  | 5.00   | 41.00  | 7.00   | 13.00  | 18.00  |
| 31.00  | 31.00  | 31.00  | 9.00   | 63.00  | 10.00  | 24.00  | 24.00  |
| 39.00  | 41.00  | 41.00  | 2.00   | 45.00  | 7.00   | 10.00  | 25.00  |
| 20.00  | 28.00  | 28.00  | 2.00   | 79.00  | 15.00  | 25.00  | 34.00  |
| 18.00  | 18.00  | 18.00  | 3.00   | 62.00  | 9.00   | 20.00  | 30.00  |
| 22.00  | 24.00  | 24.00  | 3.00   | 74.00  | 20.00  | 10.00  | 38.00  |
| 24.00  | 27.00  | 27.00  | 2.00   | 50.00  | 8.00   | 14.00  | 24.00  |
| 22.00  | 22.00  | 22.00  | 3.00   | 61.00  | 9.00   | 23.00  | 25.00  |
| 20.00  | 21.00  | 21.00  | 7.00   | 45.00  | 7.00   | 14.00  | 21.00  |
| 18.00  | 23.00  | 25.00  | 7.00   | 77.00  | 12.00  | 24.00  | 36.00  |
| 17.00  | 17.00  | 17.00  | 9.00   | 50.00  | 9.00   | 12.00  | 26.00  |
| 35.00  | 35.00  | 35.00  | 3.00   | 72.00  | 21.00  | 17.00  | 30.00  |
| 21.00  | 22.00  | 22.00  | 4.00   | 80.00  | 20.00  | 23.00  | 32.00  |
| 22.00  | 22.00  | 22.00  | 9.00   | 63.00  | 11.00  | 18.00  | 29.00  |
| 19.00  | 20.00  | 20.00  | 4.00   | 59.00  | 7.00   | 25.00  | 24.00  |
| 19.00  | 19.00  | 19.00  | 5.00   | 65.00  | 18.00  | 10.00  | 32.00  |
| 24.00  | 24.00  | 24.00  | 6.00   | 48.00  | 7.00   | 19.00  | 19.00  |
| 19.00  | 20.00  | 20.00  | 5.00   | 75.00  | 16.00  | 25.00  | 31.00  |
| 30.00  | 31.00  | 31.00  | 5.00   | 61.00  | 8.00   | 23.00  | 27.00  |
| 17.00  | 29.00  | 33.00  | 5.00   | 41.00  | 7.00   | 8.00   | 23.00  |
| 32.00  | 32.00  | 32.00  | 6.00   | 84.00  | 22.00  | 20.00  | 39.00  |
| 35.00  | 49.00  | 49.00  | 2.00   | 57.00  | 10.00  | 13.00  | 29.00  |
| 20.00  | 24.00  | 24.00  | 3.00   | 47.00  | 9.00   | 9.00   | 24.00  |
| 16.00  | 17.00  | 17.00  | 4.00   | 71.00  | 16.00  | 18.00  | 32.00  |
| #NULL! | #NULL! | #NULL! | #NULL! | #NULL! | #NULL! | #NULL! | #NULL! |
| 22.00  | 45.00  | 45.00  | 1.00   | 63.00  | 7.00   | 29.00  | 24.00  |
| 23.00  | 23.00  | 23.00  | 6.00   | 77.00  | 26.00  | 16.00  | 31.00  |
| 17.00  | 17.00  | 42.00  | 1.00   | 86.00  | 16.00  | 22.00  | 45.00  |
| 45.00  | 45.00  | 45.00  | 2.00   | 46.00  | 7.00   | 12.00  | 24.00  |
| 34.00  | 34.00  | 34.00  | 7.00   | 53.00  | 12.00  | 12.00  | 26.00  |
| 32.00  | 33.00  | 33.00  | 5.00   | 47.00  | 7.00   | 14.00  | 22.00  |
| 19.00  | 19.00  | 19.00  | 2.00   | 59.00  | 8.00   | 21.00  | 27.00  |
| 20.00  | 20.00  | 20.00  | 10.00  | 55.00  | 7.00   | 15.00  | 30.00  |
| 18.00  | 22.00  | 22.00  | 4.00   | 57.00  | 8.00   | 19.00  | 27.00  |
| 15.00  | 15.00  | 27.00  | 7.00   | 56.00  | 7.00   | 21.00  | 25.00  |
| #NULL! | #NULL! | #NULL! | #NULL! | #NULL! | #NULL! | #NULL! | #NULL! |
| 41.00  | 43.00  | 43.00  | 1.00   | 59.00  | 10.00  | 20.00  | 26.00  |
| #NULL! | #NULL! | #NULL! | #NULL! | #NULL! | #NULL! | #NULL! | #NULL! |
| 32.00  | 34.00  | 34.00  | 2.00   | 74.00  | 22.00  | 18.00  | 31.00  |
| 15.00  | 20.00  | #NULL! | 3.00   | 72.00  | 18.00  | 20.00  | 31.00  |
| 23.00  | 23.00  | 36.00  | 7.00   | 71.00  | 12.00  | 22.00  | 34.00  |
| 28.00  | 29.00  | 29.00  | 3.00   | 52.00  | 8.00   | 18.00  | 23.00  |
| 25.00  | 26.00  | 26.00  | 5.00   | 63.00  | 16.00  | 19.00  | 25.00  |
| #NULL! | #NULL! | #NULL! | #NULL! | #NULL! | #NULL! | #NULL! | #NULL! |
| 21.00  | 22.00  | 22.00  | 6.00   | 50.00  | 9.00   | 17.00  | 21.00  |
| #NULL! | #NULL! | #NULL! | #NULL! | #NULL! | #NULL! | #NULL! | #NULL! |
| 28.00  | 28.00  | 28.00  | 3.00   | 64.00  | 13.00  | 19.00  | 29.00  |
| 30.00  | 30.00  | 30.00  | 4.00   | 57.00  | 10.00  | 18.00  | 26.00  |
| 18.00  | 22.00  | 22.00  | 2.00   | 63.00  | 15.00  | 21.00  | 24.00  |
| 21.00  | 21.00  | 21.00  | 2.00   | 60.00  | 13.00  | 18.00  | 26.00  |
| 19.00  | 36.00  | 36.00  | 5.00   | 59.00  | 7.00   | 24.00  | 25.00  |
| 37.00  | 39.00  | 39.00  | 3.00   | 60.00  | 8.00   | 23.00  | 26.00  |
| 24.00  | 25.00  | 25.00  | 5.00   | 71.00  | 20.00  | 13.00  | 35.00  |
| 26.00  | 26.00  | 26.00  | 8.00   | 70.00  | 12.00  | 23.00  | 31.00  |

|        |        |        |        |        |        |        |        |
|--------|--------|--------|--------|--------|--------|--------|--------|
| 17.00  | 18.00  | 18.00  | 7.00   | 56.00  | 11.00  | 12.00  | 30.00  |
| 17.00  | 19.00  | 19.00  | 7.00   | 67.00  | 11.00  | 22.00  | 31.00  |
| 28.00  | 28.00  | 28.00  | 5.00   | 58.00  | 9.00   | 21.00  | 25.00  |
| 20.00  | 21.00  | 21.00  | 2.00   | 68.00  | 14.00  | 16.00  | 32.00  |
| 22.00  | 22.00  | 33.00  | 3.00   | 81.00  | 12.00  | 28.00  | 36.00  |
| 23.00  | 23.00  | 23.00  | 3.00   | 56.00  | 10.00  | 14.00  | 29.00  |
| 24.00  | 24.00  | 27.00  | 3.00   | 67.00  | 12.00  | 25.00  | 27.00  |
| 22.00  | 22.00  | 25.00  | 2.00   | 51.00  | 9.00   | 17.00  | 22.00  |
| 31.00  | 31.00  | 31.00  | 2.00   | 57.00  | 12.00  | 17.00  | 25.00  |
| 23.00  | 23.00  | 23.00  | 4.00   | 73.00  | 18.00  | 22.00  | 28.00  |
| 22.00  | 25.00  | 25.00  | 2.00   | 53.00  | 8.00   | 18.00  | 24.00  |
| 24.00  | 24.00  | 24.00  | 4.00   | 61.00  | 15.00  | 16.00  | 26.00  |
| 20.00  | 20.00  | 20.00  | 7.00   | 58.00  | 8.00   | 23.00  | 24.00  |
| 26.00  | 26.00  | 26.00  | 3.00   | 62.00  | 13.00  | 18.00  | 27.00  |
| 22.00  | 22.00  | 22.00  | 5.00   | 60.00  | 11.00  | 19.00  | 27.00  |
| 31.00  | 33.00  | 34.00  | 2.00   | 51.00  | 12.00  | 12.00  | 24.00  |
| 36.00  | 36.00  | 36.00  | 3.00   | 75.00  | 20.00  | 19.00  | 31.00  |
| #NULL! | #NULL! | #NULL! | #NULL! | #NULL! | #NULL! | #NULL! | #NULL! |
| #NULL! | #NULL! | #NULL! | #NULL! | #NULL! | #NULL! | #NULL! | #NULL! |
| 17.00  | 17.00  | 29.00  | 2.00   | 72.00  | 12.00  | 24.00  | 33.00  |
| 23.00  | 24.00  | 24.00  | 4.00   | 50.00  | 9.00   | 16.00  | 22.00  |
| 15.00  | 15.00  | 15.00  | 5.00   | 67.00  | 14.00  | 21.00  | 27.00  |
| 16.00  | 18.00  | 18.00  | 5.00   | 77.00  | 13.00  | 30.00  | 31.00  |
| 20.00  | 22.00  | 22.00  | 7.00   | 68.00  | 13.00  | 20.00  | 31.00  |
| 20.00  | 20.00  | 20.00  | 4.00   | 61.00  | 8.00   | 23.00  | 26.00  |
| 44.00  | 44.00  | 44.00  | 1.00   | 88.00  | 12.00  | 27.00  | 43.00  |
| #NULL! | #NULL! | #NULL! | #NULL! | #NULL! | #NULL! | #NULL! | #NULL! |
| #NULL! | #NULL! | #NULL! | #NULL! | #NULL! | #NULL! | #NULL! | #NULL! |
| 21.00  | 22.00  | 22.00  | 3.00   | 77.00  | 14.00  | 23.00  | 35.00  |
| #NULL! | #NULL! | #NULL! | #NULL! | #NULL! | #NULL! | #NULL! | #NULL! |
| 27.00  | 27.00  | 27.00  | 2.00   | 64.00  | 11.00  | 22.00  | 27.00  |
| 26.00  | 36.00  | 36.00  | 3.00   | 51.00  | 11.00  | 15.00  | 22.00  |
| 20.00  | 20.00  | 20.00  | 5.00   | 48.00  | 8.00   | 11.00  | 24.00  |
| 20.00  | 20.00  | 41.00  | 2.00   | 57.00  | 9.00   | 16.00  | 29.00  |
| 29.00  | 30.00  | 30.00  | 6.00   | 63.00  | 10.00  | 14.00  | 35.00  |
| 24.00  | 25.00  | 25.00  | 3.00   | 46.00  | 8.00   | 8.00   | 27.00  |
| 26.00  | #NULL! | #NULL! | #NULL! | 55.00  | 8.00   | 13.00  | 31.00  |
| 19.00  | 19.00  | 19.00  | 6.00   | 49.00  | 12.00  | 10.00  | 24.00  |
| 34.00  | 34.00  | 34.00  | 4.00   | 70.00  | 15.00  | 15.00  | 36.00  |
| 23.00  | 23.00  | 32.00  | 1.00   | 51.00  | 8.00   | 16.00  | 24.00  |
| 13.00  | 12.00  | 12.00  | 8.00   | 59.00  | 13.00  | 12.00  | 28.00  |
| 20.00  | 20.00  | 24.00  | 2.00   | 80.00  | 18.00  | 20.00  | 37.00  |
| 23.00  | 23.00  | 37.00  | 4.00   | 49.00  | 7.00   | 13.00  | 26.00  |
| 18.00  | 19.00  | 19.00  | 9.00   | 60.00  | 10.00  | 10.00  | 35.00  |
| 21.00  | 21.00  | 21.00  | 3.00   | 64.00  | 13.00  | 15.00  | 33.00  |
| 22.00  | 25.00  | 25.00  | 1.00   | 49.00  | 7.00   | 15.00  | 24.00  |
| 23.00  | 23.00  | 23.00  | 4.00   | 57.00  | 11.00  | 18.00  | 25.00  |
| #NULL! | #NULL! | #NULL! | #NULL! | #NULL! | #NULL! | #NULL! | #NULL! |
| 16.00  | 19.00  | 19.00  | 3.00   | 47.00  | 8.00   | 17.00  | 19.00  |
| 26.00  | 26.00  | 28.00  | 8.00   | 54.00  | 8.00   | 20.00  | 23.00  |
| 21.00  | 25.00  | 25.00  | 9.00   | 82.00  | 24.00  | 21.00  | 34.00  |
| #NULL! | #NULL! | #NULL! | #NULL! | #NULL! | #NULL! | #NULL! | #NULL! |
| 17.00  | 17.00  | 17.00  | 8.00   | 71.00  | 20.00  | 19.00  | 28.00  |
| 16.00  | 16.00  | 16.00  | 7.00   | 63.00  | 13.00  | 19.00  | 28.00  |
| 19.00  | 19.00  | 24.00  | 1.00   | 48.00  | 13.00  | 9.00   | 23.00  |
| #NULL! | #NULL! | #NULL! | #NULL! | #NULL! | #NULL! | #NULL! | #NULL! |
| 35.00  | 35.00  | 35.00  | 2.00   | 37.00  | 7.00   | 11.00  | 16.00  |
| 22.00  | 22.00  | 22.00  | 5.00   | 79.00  | 23.00  | 17.00  | 34.00  |
| 33.00  | 33.00  | 33.00  | 3.00   | 69.00  | 17.00  | 18.00  | 31.00  |
| 21.00  | 22.00  | 22.00  | 14.00  | 74.00  | 19.00  | 21.00  | 31.00  |
| 30.00  | 30.00  | 30.00  | 12.00  | 67.00  | 13.00  | 16.00  | 33.00  |
| 18.00  | 18.00  | 18.00  | 9.00   | 83.00  | 20.00  | 24.00  | 34.00  |

|       |       |       |      |       |       |       |       |
|-------|-------|-------|------|-------|-------|-------|-------|
| 23.00 | 25.00 | 25.00 | 6.00 | 69.00 | 18.00 | 17.00 | 31.00 |
| 28.00 | 34.00 | 34.00 | 3.00 | 81.00 | 20.00 | 25.00 | 33.00 |
| 28.00 | 28.00 | 28.00 | 4.00 | 68.00 | 13.00 | 23.00 | 29.00 |
| 19.00 | 20.00 | 20.00 | 2.00 | 86.00 | 15.00 | 20.00 | 45.00 |
| 33.00 | 33.00 | 33.00 | 1.00 | 67.00 | 16.00 | 15.00 | 32.00 |
| 28.00 | 28.00 | 28.00 | 5.00 | 54.00 | 10.00 | 14.00 | 27.00 |
| 20.00 | 21.00 | 21.00 | 6.00 | 66.00 | 9.00  | 25.00 | 29.00 |
| 18.00 | 20.00 | 20.00 | 4.00 | 58.00 | 12.00 | 18.00 | 25.00 |
| 20.00 | 20.00 | 20.00 | 7.00 | 52.00 | 12.00 | 15.00 | 22.00 |
| 12.00 | 17.00 | 17.00 | 2.00 | 73.00 | 10.00 | 30.00 | 30.00 |
| 27.00 | 27.00 | 27.00 | 2.00 | 65.00 | 16.00 | 19.00 | 27.00 |
| 24.00 | 24.00 | 25.00 | 3.00 | 66.00 | 18.00 | 12.00 | 28.00 |
| 20.00 | 20.00 | 20.00 | 5.00 | 51.00 | 11.00 | 10.00 | 26.00 |
| 26.00 | 26.00 | 26.00 | 5.00 | 43.00 | 12.00 | 9.00  | 19.00 |
| 14.00 | 19.00 | 19.00 | 2.00 | 55.00 | 15.00 | 14.00 | 23.00 |
| 21.00 | 29.00 | 29.00 | 4.00 | 66.00 | 15.00 | 16.00 | 28.00 |
| 26.00 | 28.00 | 28.00 | 4.00 | 42.00 | 9.00  | 12.00 | 18.00 |
| 20.00 | 20.00 | 20.00 | 3.00 | 61.00 | 19.00 | 7.00  | 26.00 |
| 18.00 | 22.00 | 22.00 | 5.00 | 57.00 | 12.00 | 19.00 | 23.00 |
| 29.00 | 29.00 | 35.00 | 3.00 | 49.00 | 14.00 | 11.00 | 21.00 |
| 23.00 | 23.00 | 23.00 | 3.00 | 69.00 | 19.00 | 20.00 | 27.00 |
| 24.00 | 24.00 | 24.00 | 4.00 | 69.00 | 19.00 | 19.00 | 28.00 |
| 21.00 | 21.00 | 22.00 | 2.00 | 59.00 | 12.00 | 21.00 | 23.00 |

| ID  | age | sex | marriage | birthday    | education | occupation | UPSA | UPSA | UPSA | STRO | tmt  | SC | hvit |
|-----|-----|-----|----------|-------------|-----------|------------|------|------|------|------|------|----|------|
| 1   | 22  | 2   | single   | 21-Feb-1986 | 6.00      | blueco     | 8    | 11   | 19   |      | 0.20 | 34 | 19   |
| 8   | 22  | 1   | single   | 22-Jul-1985 | 12.00     | nurse      | 16   | 18   | 34   | 56   | 0.30 | 79 | 25   |
| 9   | 40  | 2   | married  | 08-May-1967 | 6.00      | bluecollar |      |      |      | 48   | 0.23 | 42 | 19   |
| 11  | 36  | 1   | single   | 09-Apr-1971 | 12.00     | blueco     | 18   | 18   | 36   | 52   | 0.29 | 65 | 34   |
| 12  | 36  | 2   | single   | 01-Jan-1972 | 12.00     | whitec     | 20   | 20   | 40   | 61   | 0.26 | 75 | 31   |
| 14  | 49  | 2   | single   | 01-May-1958 | 6.00      | blueco     | 18   | 16   | 34   | 42   | 0.23 | 35 | 15   |
| 17  | 50  | 1   | married  | 20-Feb-1957 | 15.00     | whitec     | 20   | 18   | 38   | 45   | 0.23 | 47 | 22   |
| 20  | 49  | 2   | married  | 09-Sep-1958 | 6.00      | blueco     | 4    | 0    | 4    | 39   | 0.23 | 20 | 16   |
| 21  | 37  | 1   | married  | 01-Oct-1970 | 15.00     | whitec     | 20   | 18   | 38   | 51   | 0.26 | 55 | 28   |
| 33  | 23  | 1   | single   | 14-Aug-1984 | 6.00      | blueco     | 18   | 20   | 38   | 56   | 0.27 | 51 | 26   |
| 37  | 60  | 2   | married  | 15-Feb-1948 | 6.00      | blueco     | 18   | 18   | 36   | 26   | 0.26 | 50 | 20   |
| 46  | 60  | 1   | married  | 18-Jun-1947 | 6.00      | solider    | 20   | 18   | 38   | 34   | 0.29 | 45 | 23   |
| 48  | 49  | 2   | married  | 01-Feb-1959 | 12.00     | blueco     | 14   | 13   | 27   | 24   | 0.25 | 34 | 15   |
| 50  | 52  | 1   | married  | 10-May-1955 | 6.00      | blueco     | 16   | 16   | 32   | 50   | 0.27 | 43 | 24   |
| 51  | 49  | 1   | single   | 01-Jun-1958 | 12.00     | blueco     | 18   | 16   | 34   | 29   | 0.27 | 39 | 19   |
| 54  | 54  | 2   | single   | 30-May-1953 | 6.00      | blueco     | 18   | 16   | 34   | 20   | 0.26 | 35 | 22   |
| 58  | 29  | 1   | married  | 05-Mar-1978 | 9.00      | blueco     | 18   | 13   | 31   | 56   | 0.23 | 47 | 23   |
| 64  | 41  | 1   | single   | 01-Mar-1967 | 9.00      | blueco     | 20   | 16   | 36   | 39   | 0.29 | 47 | 26   |
| 65  | 23  | 2   | single   | 01-Dec-1984 | 9.00      | blueco     | 16   | 18   | 34   | 52   | 0.30 | 54 | 27   |
| 66  | 52  | 2   | married  | 30-Oct-1955 | 9.00      | blueco     | 10   | 11   | 21   | 44   | 0.28 | 40 | 25   |
| 68  | 59  | 2   | married  | 15-Aug-1948 | 6.00      | farmer     | 8    | 7    | 15   | 33   | 0.22 | 27 | 20   |
| 69  | 33  | 1   | married  | 07-Jan-1975 | 12.00     | blueco     | 18   | 20   | 38   | 66   | 0.30 | 61 | 32   |
| 74  | 56  | 1   | married  | 13-Jun-1951 | 9.00      | blueco     | 20   | 16   | 36   | 40   | 0.23 | 31 | 25   |
| 89  | 49  | 2   | married  | 17-May-1958 | 6.00      | blueco     | 8    | 7    | 15   | 42   | 0.24 | 41 | 15   |
| 90  | 45  | 1   | married  | 12-Jun-1962 | 6.00      | Engine     | 20   | 18   | 38   | 46   | 0.28 | 46 | 25   |
| 91  | 24  | 2   | single   | 29-Jan-1983 | 6.00      | whitec     | 18   | 16   | 34   | 53   | 0.29 | 66 | 35   |
| 93  | 44  | 1   | married  | 11-Dec-1963 | 12.00     | blueco     | 18   | 16   | 34   | 42   | 0.25 | 47 | 21   |
| 94  | 68  | 2   | married  | 01-Jan-1940 | 6.00      | blueco     | 16   | 16   | 32   | 40   | 0.22 | 16 | 21   |
| 100 | 55  | 2   | married  | 08-Apr-1952 | 9.00      | blueco     | 16   | 9    | 25   | 36   | 0.25 | 30 | 16   |
| 102 | 27  | 1   | single   | 11-Apr-1980 | 6.00      | blueco     | 6    | 4    | 10   | 17   | 0.25 | 37 | 23   |
| 103 | 57  | 2   | single   | 02-Dec-1950 | 9.00      | blueco     | 18   | 18   | 36   | 31   | 0.21 | 32 | 18   |
| 107 | 56  | 1   | married  | 01-Sep-1951 | 12.00     | whitec     | 20   | 16   | 36   | 51   | 0.30 | 56 | 23   |
| 111 | 21  | 1   | single   | 24-Jun-1986 | 12.00     | nurse      | 16   | 13   | 29   | 50   | 0.24 | 56 | 24   |
| 113 | 60  | 2   | married  | 15-May-1947 | 6.00      | other      | 14   | 18   | 32   | 34   | 0.22 | 31 | 24   |
| 121 | 45  | 1   | married  | 27-Dec-1962 | 9.00      | blueco     | 18   | 18   | 36   | 49   | 0.27 | 44 | 21   |
| 125 | 18  | 2   | single   | 24-Feb-1989 | 6.00      | blueco     | 16   | 7    | 23   | 38   | 0.28 | 41 | 20   |
| 139 | 55  | 1   | married  | 03-Sep-1952 | 9.00      | blueco     | 20   | 11   | 31   | 42   | 0.28 | 30 | 22   |
| 142 | 43  | 2   | married  | 01-Dec-1964 | 12.00     | blueco     | 20   | 16   | 36   | 52   | 0.29 | 45 | 22   |
| 143 | 55  | 1   | married  | 10-Jul-1952 | 9.00      | blueco     | 16   | 13   | 29   | 41   | 0.25 | 31 | 21   |
| 150 | 58  | 2   | married  | 09-Oct-1949 | 6.00      | blueco     | 20   | 13   | 33   | 27   | 0.24 | 41 | 25   |
| 151 | 21  | 2   | single   | 25-Aug-1986 | 12.00     | nurse      | 18   | 20   | 38   | 40   | 0.26 | 69 | 27   |
| 159 | 43  | 1   | married  | 31-Dec-1964 | 9.00      | blueco     | 18   | 16   | 34   | 15   | 0.26 | 26 | 22   |
| 168 | 48  | 1   | married  | 08-Nov-1959 | 12.00     | blueco     | 18   | 16   | 34   | 35   | 0.25 | 37 | 23   |
| 170 | 59  | 2   | single   | 14-Jan-1949 | 6.00      | blueco     | 12   | 7    | 19   | 30   | 0.23 | 22 | 17   |
| 173 | 45  | 2   | married  | 26-Feb-1962 | 15.00     | other      | 20   | 16   | 36   | 47   | 0.26 | 56 | 31   |
| 174 | 51  | 1   | married  | 05-Nov-1956 | 6.00      | blueco     | 14   | 7    | 21   | 42   | 0.23 | 29 | 17   |
| 177 | 32  | 1   | married  | 18-Nov-1975 | 15.00     | whitec     | 14   | 16   | 30   | 39   | 0.26 | 35 | 29   |
| 180 | 55  | 1   | married  | 11-Feb-1952 | 9.00      | blueco     | 16   | 9    | 25   | 10   | 0.24 | 44 | 23   |
| 186 | 49  | 1   | single   | 14-Jul-1958 | 9.00      | blueco     | 18   | 20   | 38   | 39   | 0.24 | 34 | 22   |
| 187 | 24  | 2   | single   | 23-Jul-1983 | 9.00      | blueco     | 20   | 16   | 36   | 45   | 0.26 | 54 | 26   |
| 190 | 19  | 2   | single   | 15-Nov-1988 | 6.00      | blueco     | 8    | 9    | 17   | 37   | 0.23 | 36 | 21   |
| 198 | 49  | 2   | single   | 21-Aug-1958 | 12.00     | blueco     | 12   | 13   | 25   | 42   | 0.24 | 22 | 20   |
| 199 | 32  | 1   | married  | 15-Sep-1975 | 12.00     | whitec     | 18   | 20   | 38   | 24   | 0.32 | 58 | 22   |
| 203 | 43  | 2   | married  | 10-Nov-1964 | 9.00      | blueco     | 14   | 18   | 32   | 63   | 0.25 | 51 | 25   |
| 207 | 35  | 1   | married  | 07-Mar-1972 | 9.00      | blueco     | 18   | 11   | 29   | 42   | 0.26 | 54 | 26   |
| 217 | 59  | 2   | single   | 05-Apr-1948 | 6.00      | blueco     | 12   | 18   | 30   | 39   | 0.22 | 32 | 19   |
| 218 | 58  | 1   | single   | 02-Jan-1950 | 9.00      | blueco     | 10   | 4    | 14   | 37   | 0.24 | 28 | 17   |
| 219 | 49  | 2   | married  | 10-May-1958 | 6.00      | blueco     | 20   | 13   | 33   | 36   | 0.23 | 34 | 22   |
| 227 | 36  | 1   | married  | 14-Feb-1971 | 9.00      | blueco     | 14   | 9    | 23   | 49   | 0.23 | 52 | 24   |
| 228 | 60  | 2   | married  | 10-Sep-1947 | 6.00      | blueco     | 8    | 7    | 15   | 18   | 0.19 | 17 | 16   |

|     |    |   |         |             |       |         |    |    |    |    |      |    |    |
|-----|----|---|---------|-------------|-------|---------|----|----|----|----|------|----|----|
| 229 | 47 | 2 | married | 15-Aug-1960 | 12.00 | whitec  | 14 | 18 | 32 | 58 | 0.24 | 62 | 25 |
| 233 | 58 | 1 | married | 02-Aug-1949 | 6.00  | blueco  | 18 | 16 | 34 | 40 | 0.25 | 19 | 19 |
| 235 | 57 | 2 | single  | 01-Jun-1950 | 6.00  | blueco  | 18 | 13 | 31 | 39 | 0.22 | 22 | 20 |
| 236 | 23 | 1 | single  | 05-Jan-1985 | 6.00  | Engine  | 18 | 13 | 31 | 69 | 0.24 | 58 | 30 |
| 237 | 60 | 2 | married | 06-Mar-1948 | 6.00  | blueco  | 16 | 20 | 36 | 46 | 0.23 | 32 | 15 |
| 240 | 48 | 2 | married | 01-Mar-1959 | 12.00 | whitec  | 18 | 16 | 34 | 42 | 0.24 | 50 | 25 |
| 241 | 46 | 2 | married | 01-Dec-1961 | 12.00 | blueco  | 16 | 7  | 23 | 39 | 0.26 | 39 | 17 |
| 242 | 49 | 2 | married | 04-Jan-1959 | 9.00  | blueco  | 10 | 16 | 26 | 28 | 0.24 | 37 | 15 |
| 243 | 51 | 2 | married | 22-Feb-1957 | 6.00  | blueco  | 18 | 9  | 27 | 42 | 0.27 | 30 | 12 |
| 244 | 32 | 2 | married | 17-Jul-1975 | 6.00  | self-en | 16 | 7  | 23 | 41 | 0.24 | 50 | 18 |
| 246 | 60 | 1 | married | 12-Apr-1948 | 9.00  | blueco  | 10 | 16 | 26 | 20 | 0.22 | 34 | 18 |
| 247 | 27 | 2 | married | 19-Sep-1980 | 9.00  | self-en | 20 | 13 | 33 | 49 | 0.27 | 54 | 30 |
| 248 | 53 | 2 | single  | 01-Dec-1954 | 6.00  | blueco  | 2  | 0  | 2  | 20 | 0.20 | 15 | 15 |
| 250 | 49 | 2 | married | 07-Jan-1959 | 12.00 | blueco  | 16 | 13 | 29 | 61 | 0.28 | 40 | 17 |
| 257 | 28 | 1 | married | 01-Aug-1979 | 6.00  | self-en | 16 | 16 | 32 | 34 | 0.24 | 35 | 21 |
| 258 | 56 | 1 | single  | 16-Aug-1951 | 6.00  | blueco  | 18 | 13 | 31 |    | 0.23 | 26 | 10 |
| 259 | 56 | 1 | single  | 05-Oct-1951 | 9.00  | blueco  | 20 | 16 | 36 | 47 | 0.25 | 48 | 17 |
| 260 | 65 | 1 | married | 13-Apr-1943 | 6.00  | blueco  | 4  | 4  | 8  | 16 | 0.21 |    | 7  |
| 262 | 58 | 2 | married | 21-Sep-1949 | 9.00  | farmer  | 18 | 18 | 36 | 46 | 0.24 | 44 | 22 |
| 263 | 60 | 2 | married | 16-Dec-1947 | 6.00  | other   | 12 | 11 | 23 | 49 | 0.21 | 37 | 23 |
| 266 | 60 | 2 | married | 07-Feb-1948 | 6.00  | blueco  | 16 | 13 | 29 | 27 | 0.30 | 45 | 23 |
| 267 | 54 | 2 | married | 07-Mar-1954 | 15.00 | blueco  | 16 | 13 | 29 | 58 | 0.24 | 48 | 16 |
| 269 | 21 | 1 | single  | 02-Aug-1986 | 6.00  | blueco  | 18 | 18 | 36 | 46 | 0.27 | 75 | 25 |
| 270 | 52 | 1 | single  | 01-Feb-1956 | 6.00  | blueco  | 18 | 18 | 36 | 35 | 0.24 | 37 | 25 |
| 271 | 44 | 1 | single  | 29-Jun-1964 | 9.00  | self-en | 18 | 13 | 31 |    | 0.22 | 36 | 10 |
| 272 | 23 | 2 | single  | 08-May-1985 | 6.00  | blueco  | 18 | 20 | 38 | 49 | 0.25 | 65 | 28 |
| 273 | 44 | 2 | single  | 13-Sep-1963 | 6.00  | blueco  | 18 | 13 | 31 | 48 | 0.27 | 50 | 22 |
| 274 | 50 | 1 | married | 09-Oct-1957 | 6.00  | blueco  | 16 | 2  | 18 | 29 | 0.23 | 31 | 8  |
| 275 | 55 | 2 | married | 25-Apr-1953 | 12.00 | whitec  | 20 | 18 | 38 | 40 | 0.28 | 50 | 19 |
| 276 | 29 | 2 | married | 08-Dec-1978 | 6.00  | blueco  | 14 | 11 | 25 | 42 | 0.25 | 48 | 24 |
| 277 | 45 | 2 | married | 15-Dec-1962 | 6.00  | farmer  | 8  | 4  | 12 | 8  | 0.19 | 12 | 11 |
| 278 | 42 | 2 | single  | 28-Aug-1965 | 6.00  | blueco  | 8  | 4  | 12 | 14 | 0.20 | 23 | 17 |
| 279 | 28 | 1 | married | 04-Jan-1980 | 9.00  | blueco  | 16 | 9  | 25 | 49 | 0.23 | 26 | 25 |
| 281 | 40 | 2 | married | 15-Oct-1967 | 6.00  | other   | 14 | 7  | 21 | 42 | 0.23 | 45 | 19 |
| 283 | 58 | 1 | married | 18-Jan-1950 | 9.00  | blueco  | 20 | 18 | 38 | 61 | 0.29 | 49 | 22 |
| 284 | 51 | 2 | married | 15-Jun-1957 | 9.00  | blueco  | 16 | 11 | 27 | 44 | 0.31 | 50 | 25 |
| 287 | 48 | 2 | married | 19-Mar-1960 | 6.00  | blueco  | 18 | 16 | 34 | 35 | 0.23 | 41 | 19 |
| 288 | 44 | 2 | married | 17-Mar-1964 | 6.00  | self-en | 16 | 4  | 20 | 50 | 0.23 | 33 | 20 |
| 289 | 58 | 2 | married | 12-Oct-1949 | 9.00  | whitec  | 20 | 18 | 38 | 42 | 0.25 | 50 | 25 |
| 290 | 17 | 1 | single  | 18-Mar-1991 | 9.00  | blueco  | 18 | 16 | 34 | 34 | 0.25 | 57 | 27 |
| 291 | 44 | 2 | married | 15-Oct-1963 | 6.00  | blueco  | 8  | 7  | 15 | 35 | 0.21 | 27 | 18 |
| 292 | 54 | 2 | single  | 07-Nov-1953 | 6.00  | blueco  | 14 | 13 | 27 | 45 | 0.24 | 34 | 15 |
| 293 | 55 | 2 | married | 01-Dec-1952 | 9.00  | whitec  | 18 | 20 | 38 | 34 | 0.25 | 47 | 20 |
| 294 | 52 | 2 | married | 16-Mar-1956 | 9.00  | blueco  | 10 | 18 | 28 | 28 | 0.24 | 34 | 22 |
| 295 | 45 | 2 | married | 10-Oct-1962 | 6.00  | farmer  | 6  | 7  | 13 | 26 | 0.22 | 26 | 17 |
| 296 | 44 | 1 | married | 23-Oct-1963 | 12.00 | blueco  | 18 | 18 | 36 | 67 | 0.27 | 51 | 29 |
| 297 | 18 | 1 | single  | 30-May-1990 | 9.00  | blueco  | 18 | 11 | 29 | 50 | 0.26 | 49 | 18 |
| 298 | 56 | 2 | divorce | 18-Jul-1951 | 9.00  | farmer  | 12 | 4  | 16 | 34 | 0.27 | 35 | 20 |
| 301 | 34 | 1 | single  | 23-Feb-1974 | 12.00 | blueco  | 20 | 18 | 38 | 31 | 0.27 | 39 | 23 |
| 302 | 61 | 2 | married | 10-Feb-1947 | 6.00  | farmer  | 14 | 13 | 27 | 32 | 0.22 | 22 | 20 |
| 303 | 47 | 1 | married | 27-Oct-1960 | 6.00  | blueco  | 8  | 13 | 21 | 36 | 0.25 | 29 | 13 |
| 304 | 48 | 1 | married | 14-Nov-1959 | 9.00  | blueco  | 16 | 9  | 25 | 33 | 0.24 | 28 | 23 |
| 305 | 30 | 2 | single  | 04-Aug-1977 | 9.00  | self-en | 16 | 11 | 27 | 32 | 0.26 | 43 | 20 |
| 308 | 60 | 2 | single  | 15-Mar-1948 | 6.00  | blueco  | 12 | 16 | 28 | 60 | 0.25 | 20 | 17 |
| 310 | 59 | 2 | married | 01-Jan-1949 | 6.00  | blueco  | 12 | 13 | 25 | 16 | 0.22 | 28 | 10 |
| 311 | 59 | 2 | married | 07-Mar-1949 | 6.00  | blueco  | 14 | 7  | 21 | 44 | 0.22 | 21 | 11 |
| 312 | 20 | 1 | single  | 25-Dec-1987 | 6.00  | other   | 10 | 0  | 10 | 53 | 0.20 | 31 | 15 |
| 313 | 51 | 2 | single  | 09-Feb-1957 | 9.00  | whitec  | 20 | 18 | 38 | 33 | 0.28 | 30 | 16 |
| 314 | 45 | 2 | married | 16-Mar-1963 | 19.00 | blueco  | 20 | 20 | 40 | 57 | 0.26 | 55 | 27 |
| 315 | 58 | 2 | married | 01-Dec-1949 | 6.00  | blueco  | 12 | 9  | 21 | 38 | 0.19 | 21 | 17 |
| 316 | 58 | 1 | single  | 20-Jan-1950 | 9.00  | blueco  | 18 | 18 | 36 | 39 | 0.24 | 31 | 18 |
| 317 | 40 | 2 | single  | 29-Nov-1967 | 6.00  | blueco  | 16 | 7  | 23 | 46 | 0.24 | 32 | 20 |

|     |    |   |         |             |       |             |    |    |    |    |      |    |    |
|-----|----|---|---------|-------------|-------|-------------|----|----|----|----|------|----|----|
| 318 | 36 | 2 | married | 26-Feb-1972 | 6.00  | blueco      | 8  | 9  | 17 | 39 | 0.27 | 44 | 19 |
| 319 | 48 | 2 | married | 28-Dec-1959 | 9.00  | blueco      | 20 | 16 | 36 | 45 | 0.24 | 35 | 20 |
| 320 | 59 | 1 | married | 17-Oct-1948 | 6.00  | blueco      | 16 | 18 | 34 | 23 | 0.20 | 35 | 21 |
| 322 | 55 | 2 | single  | 06-May-1953 | 6.00  | blueco      | 16 | 13 | 29 | 46 | 0.25 | 36 | 19 |
| 323 | 45 | 1 | married | 29-Mar-1963 | 9.00  | blueco      | 14 | 9  | 23 | 11 | 0.26 | 38 | 18 |
| 324 | 39 | 1 | married | 01-Jan-1969 | 6.00  | self-en     | 14 | 2  | 16 | 22 | 0.23 | 37 | 20 |
| 325 | 61 | 1 | married | 21-Dec-1946 | 6.00  | farmer      | 20 | 16 | 36 | 41 | 0.23 | 26 | 15 |
| 327 | 31 | 2 | married | 06-Dec-1976 | 12.00 | whitec      | 20 | 18 | 38 | 56 | 0.25 | 62 | 27 |
| 328 | 52 | 2 | single  | 31-Dec-1955 | 6.00  | blueco      | 20 | 20 | 40 | 47 | 0.27 | 50 | 26 |
| 329 | 36 | 2 | single  | 29-Jun-1972 | 12.00 | other       | 20 | 13 | 33 | 58 | 0.26 | 70 | 28 |
| 330 | 45 | 1 | married | 20-Nov-1962 | 9.00  | blueco      | 16 | 9  | 25 | 58 | 0.24 | 43 | 25 |
| 331 | 48 | 2 | married | 16-Jun-1960 | 6.00  | blueco      | 12 | 13 | 25 | 39 | 0.22 | 19 | 24 |
| 332 | 40 | 2 | married | 23-Mar-1968 | 15.00 | blueco      | 18 | 18 | 36 | 40 | 0.28 | 50 | 20 |
| 333 | 50 | 2 | married | 11-Oct-1957 | 6.00  | blueco      | 18 | 18 | 36 | 36 | 0.27 | 38 | 21 |
| 334 | 34 | 2 | married | 24-Oct-1973 | 12.00 | other       | 20 | 16 | 36 | 58 | 0.25 | 55 | 23 |
| 335 | 25 | 2 | single  | 17-Aug-1982 | 6.00  | blueco      | 10 | 4  | 14 | 35 | 0.20 | 33 | 18 |
| 336 | 41 | 1 | married | 08-Jul-1967 | 15.00 | whitec      | 20 | 16 | 36 | 37 | 0.25 | 53 | 25 |
| 337 | 40 | 2 | married | 28-Apr-1968 | 6.00  | nurse       | 20 | 18 | 38 | 48 | 0.26 | 66 | 25 |
| 338 | 26 | 1 | single  | 01-Feb-1983 | 15.00 | nurse       | 18 | 18 | 36 | 52 | 0.25 | 74 | 29 |
| 339 | 49 | 1 | married | 10-Feb-1959 | 12.00 | whitecollar |    |    |    |    | 0.21 | 35 | 14 |
| 341 | 55 | 1 | married | 09-Jan-1954 | 15.00 | physician   |    |    |    |    | 0.27 | 44 | 16 |
| 342 | 49 | 2 | married | 06-Jul-1959 | 12.00 | whitecollar |    |    |    |    | 0.26 | 41 | 25 |
| 343 | 48 | 2 | married | 15-Jul-1960 | 12.00 | whitec      | 18 | 11 | 29 | 50 | 0.29 | 54 | 18 |
| 344 | 41 | 1 | married | 27-Nov-1967 | 12.00 | blueco      | 18 | 18 | 36 | 37 | 0.25 | 38 | 26 |
| 345 | 48 | 2 | married | 24-Jul-1960 | 12.00 | whitec      | 18 | 18 | 36 | 43 | 0.29 | 62 | 27 |
| 346 | 27 | 2 | single  | 26-Nov-1981 | 19.00 | whitec      | 18 | 18 | 36 | 54 | 0.28 | 66 | 28 |
| 347 | 46 | 2 | married | 30-Nov-1962 | 6.00  | whitec      | 20 | 16 | 36 | 63 | 0.28 | 68 | 26 |
| 348 | 48 | 1 | married | 25-Jul-1960 | 12.00 | other       |    |    |    |    | 0.23 | 29 | 21 |
| 349 | 24 | 2 | single  | 18-Jun-1984 | 15.00 | blueco      | 18 | 20 | 38 | 53 | 0.31 | 83 | 29 |
| 350 | 50 | 1 | married | 17-Jun-1958 | 6.00  | whitec      | 20 | 18 | 38 | 47 | 0.26 | 52 | 23 |
| 351 | 39 | 2 | married | 12-Dec-1969 | 6.00  | whitec      | 20 | 20 | 40 | 52 | 0.24 | 62 | 33 |
| 352 | 27 | 1 | single  | 11-Mar-1981 | 12.00 | nurse       | 18 | 18 | 36 | 38 | 0.30 | 63 | 24 |
| 353 | 47 | 1 | married | 08-Jan-1962 | 12.00 | bluecollar  |    |    |    |    | 0.26 | 41 | 23 |
| 355 | 51 | 1 | married | 16-Oct-1957 | 15.00 | whitec      | 20 | 18 | 38 | 32 | 0.27 | 53 | 30 |
| 356 | 46 | 2 | married | 13-Sep-1962 | 15.00 | blueco      | 20 | 18 | 38 | 37 | 0.29 | 57 | 26 |
| 357 | 47 | 1 | married | 12-Sep-1961 | 12.00 | other       | 20 | 13 | 33 | 57 | 0.25 | 46 | 25 |
| 358 | 47 | 2 | married | 19-Jul-1961 | 6.00  | whitec      | 20 | 20 | 40 | 60 | 0.34 | 71 | 32 |
| 359 | 50 | 2 | married | 02-Jun-1958 | 15.00 | nurse       | 20 | 18 | 38 | 54 | 0.29 | 65 | 30 |
| 360 | 48 | 1 | married | 14-Mar-1960 | 12.00 | blueco      | 20 | 13 | 33 | 58 | 0.29 | 48 | 20 |
| 361 | 51 | 2 | married | 14-Nov-1957 | 15.00 | whitec      | 16 | 18 | 34 | 47 | 0.26 | 64 | 20 |
| 362 | 34 | 1 | married | 14-Sep-1974 | 6.00  | nurse       | 18 | 18 | 36 | 47 | 0.28 | 68 | 31 |
| 364 | 53 | 1 | married | 16-Jul-1955 | 6.00  | whitec      | 20 | 18 | 38 | 30 | 0.28 | 45 | 22 |
| 365 | 40 | 1 | married | 30-Sep-1968 | 12.00 | whitec      | 18 | 18 | 36 | 20 | 0.25 | 44 | 22 |
| 366 | 51 | 2 | married | 15-Dec-1957 | 12.00 | nurse       | 20 | 16 | 36 | 49 | 0.27 | 57 | 26 |
| 367 | 40 | 1 | married | 27-Mar-1968 | 6.00  | physic      | 18 | 20 | 38 | 42 | 0.28 | 56 | 26 |
| 368 | 45 | 1 | married | 19-Jan-1964 | 12.00 | blueco      | 18 | 16 | 34 | 28 | 0.22 | 52 | 24 |
| 369 | 33 | 1 | married | 10-Aug-1975 | 12.00 | nurse       | 18 | 20 | 38 | 46 | 0.27 | 59 | 32 |
| 370 | 55 | 1 | married | 10-Nov-1953 | 12.00 | whitec      | 20 | 20 | 40 | 32 | 0.25 | 50 | 27 |
| 371 | 46 | 1 | married | 16-Jan-1963 | 6.00  | whitec      | 18 | 18 | 36 | 36 | 0.28 | 50 | 29 |
| 372 | 51 | 2 | married | 22-Mar-1957 | 15.00 | whitec      | 20 | 18 | 38 | 45 | 0.26 | 67 | 26 |
| 373 | 50 | 1 | married | 05-Dec-1958 | 6.00  | other       | 20 | 18 | 38 | 49 | 0.27 | 39 | 25 |
| 374 | 23 | 2 | single  | 17-Dec-1985 | 15.00 | other       | 18 | 18 | 36 | 32 | 0.28 | 64 | 29 |
| 375 | 45 | 2 | married | 15-Dec-1963 | 6.00  | whitec      | 20 | 20 | 40 | 58 | 0.29 | 64 | 28 |
| 376 | 46 | 2 | married | 18-Dec-1962 | 6.00  | whitec      | 20 | 20 | 40 | 46 | 0.31 | 36 | 28 |
| 377 | 46 | 1 | married | 20-Sep-1962 | 6.00  | whitec      | 20 | 20 | 40 | 47 | 0.27 | 52 | 27 |
| 378 | 23 | 1 | single  | 09-Mar-1985 | 6.00  | whitec      | 18 | 13 | 31 | 66 | 0.29 | 69 | 29 |
| 380 | 32 | 1 | married | 29-Aug-1976 | 12.00 | nurse       | 20 | 18 | 38 | 30 | 0.28 | 68 | 21 |
| 381 | 34 | 2 | married | 16-Jun-1974 | 19.00 | physic      | 20 | 18 | 38 | 55 | 0.26 | 62 | 35 |
| 382 | 41 | 1 | single  | 28-Feb-1967 | 9.00  | blueco      | 16 | 13 | 29 | 45 | 0.25 | 32 | 20 |
| 383 | 24 | 1 | single  | 15-May-1984 | 15.00 | whitec      | 18 | 20 | 38 | 58 | 0.28 | 63 | 27 |
| 384 | 46 | 2 | married | 20-Nov-1962 | 15.00 | whitec      | 20 | 9  | 29 | 46 | 0.24 | 71 | 21 |
| 385 | 41 | 1 | married | 12-Dec-1967 | 12.00 | whitec      | 18 | 16 | 34 | 56 | 0.26 | 64 | 31 |



|     |    |   |        |             |       |        |    |    |    |    |      |    |    |
|-----|----|---|--------|-------------|-------|--------|----|----|----|----|------|----|----|
| 386 | 47 | 1 | marrie | 25-Nov-1961 | 15.00 | nurse  | 20 | 16 | 36 | 43 | 0.25 | 44 | 20 |
| 387 | 45 | 1 | marrie | 07-Feb-1963 | 6.00  | physic | 20 | 18 | 38 | 40 | 0.29 | 62 | 26 |
| 388 | 29 | 1 | single | 15-May-1979 | 19.00 | physic | 20 | 18 | 38 | 73 | 0.26 | 75 | 30 |
| 389 | 43 | 2 | marrie | 30-Aug-1965 | 12.00 | blueco | 18 | 18 | 36 | 31 | 0.25 | 58 | 19 |
| 390 | 55 | 1 | marrie | 13-Jul-1953 | 6.00  | physic | 20 | 20 | 40 | 50 | 0.26 | 43 | 33 |

| ss | ds | maze | bvmt | cf | eit   | cpt  | dspan | upsa | tmtt | sct | hvltt | sst | dst | mazet |
|----|----|------|------|----|-------|------|-------|------|------|-----|-------|-----|-----|-------|
| 9  | 14 |      | 15   | 15 | 10.17 | 1.13 | 10    | 19   | 37   | 49  | 51    | 42  | 48  |       |
| 25 | 23 | 21   | 35   | 23 | 8.18  | 3.13 | 25    | 34   | 71   | 80  | 62    | 87  | 65  | 71    |
| 15 | 12 | 10   | 14   | 14 | 7.95  | 1.06 |       |      | 47   | 54  | 51    | 59  | 44  | 60    |
| 19 | 23 | 18   | 32   | 28 | 11.18 | 3.20 | 21    | 36   | 68   | 70  | 79    | 70  | 65  | 69    |
| 18 | 26 | 21   | 32   | 44 | 10.29 | 3.33 | 24    | 40   | 56   | 77  | 73    | 67  | 71  | 71    |
| 18 | 19 | 1    | 28   | 19 | 6.84  | 1.45 | 14    | 34   | 47   | 49  | 44    | 67  | 57  | 32    |
| 19 | 17 | 8    | 28   | 27 | 8.37  | 1.01 | 19    | 38   | 46   | 58  | 56    | 70  | 53  | 57    |
| 13 | 8  | 11   | 27   | 17 | 8.10  | 0.59 | 10    | 4    | 45   | 39  | 45    | 53  | 36  | 62    |
| 17 | 27 | 15   | 28   | 18 | 10.67 | 3.05 | 24    | 38   | 56   | 63  | 68    | 64  | 73  | 66    |
| 21 | 25 | 20   | 35   | 22 | 10.88 | 2.79 | 25    | 38   | 59   | 60  | 64    | 76  | 69  | 71    |
| 12 | 15 |      | 13   | 15 | 8.73  | 2.39 | 11    | 36   | 56   | 60  | 53    | 50  | 49  |       |
| 16 | 13 | 16   | 26   | 25 | 7.87  | 2.51 | 15    | 38   | 66   | 56  | 58    | 62  | 46  | 67    |
| 13 | 14 | 12   | 18   | 17 | 5.74  | 1.65 | 14    | 27   | 52   | 49  | 44    | 53  | 48  | 63    |
| 7  | 21 | 5    | 31   | 21 | 9.23  | 1.63 | 18    | 32   | 60   | 55  | 60    | 36  | 61  | 50    |
| 9  | 11 | 9    | 13   | 22 | 7.18  | 2.20 | 15    | 34   | 61   | 52  | 51    | 42  | 42  | 59    |
| 10 | 21 | 7    | 8    | 19 | 9.83  | 2.29 | 21    | 34   | 56   | 49  | 56    | 44  | 61  | 55    |
| 17 | 17 | 5    | 19   | 17 | 8.00  | 2.13 | 15    | 31   | 47   | 58  | 58    | 64  | 53  | 50    |
| 19 | 24 | 11   | 28   | 18 | 10.58 | 2.17 | 19    | 36   | 68   | 58  | 64    | 70  | 67  | 62    |
| 12 | 17 | 8    | 29   | 23 | 7.54  | 1.77 | 18    | 34   | 69   | 63  | 66    | 50  | 53  | 57    |
| 11 | 19 | 16   | 17   | 26 | 8.18  | 2.42 | 12    | 21   | 63   | 53  | 62    | 47  | 57  | 67    |
| 12 | 16 | 5    | 12   | 20 | 8.11  | 1.08 | 14    | 15   | 44   | 44  | 53    | 50  | 51  | 50    |
| 19 | 18 | 24   | 33   | 20 | 8.47  | 2.28 | 18    | 38   | 71   | 67  | 75    | 70  | 55  | 74    |
| 9  | 22 |      | 25   | 30 | 8.53  | 1.67 | 14    | 36   | 47   | 46  | 62    | 42  | 63  |       |
| 10 | 13 | 4    | 21   | 16 | 6.07  | 1.77 | 11    | 15   | 50   | 53  | 44    | 44  | 46  | 47    |
| 17 | 25 | 18   | 14   | 26 | 10.54 | 2.17 | 23    | 38   | 64   | 57  | 62    | 64  | 69  | 69    |
| 15 | 25 | 17   | 31   | 29 | 9.36  | 3.29 | 25    | 34   | 65   | 71  | 80    | 59  | 69  | 68    |
| 16 | 20 | 16   | 19   | 20 | 7.15  | 2.97 | 21    | 34   | 54   | 58  | 55    | 62  | 59  | 67    |
| 2  | 15 | 8    | 16   | 17 | 8.91  | 1.56 | 14    | 32   | 43   | 36  | 55    | 22  | 49  | 57    |
| 12 | 15 | 6    | 22   | 22 | 7.34  | 1.99 | 12    | 25   | 52   | 46  | 45    | 50  | 49  | 53    |
| 17 | 14 | 4    | 15   | 12 | 7.79  | 1.70 | 12    | 10   | 52   | 51  | 58    | 64  | 48  | 47    |
| 2  | 14 |      | 11   | 14 | 7.76  | 1.90 | 12    | 36   | 39   | 47  | 49    | 22  | 48  |       |
| 19 | 22 | 4    | 27   | 20 | 9.61  | 3.05 | 16    | 36   | 70   | 64  | 58    | 70  | 63  | 47    |
| 14 | 24 | 12   | 16   | 21 | 7.62  | 2.86 | 18    | 29   | 51   | 64  | 60    | 56  | 67  | 63    |
| 11 | 15 | 14   | 29   | 13 | 7.52  | 2.49 | 10    | 32   | 43   | 46  | 60    | 47  | 49  | 65    |
| 9  | 25 | 7    | 23   | 23 | 9.00  | 2.20 | 18    | 36   | 60   | 56  | 55    | 42  | 69  | 55    |
| 14 | 16 | 12   | 16   | 18 | 6.75  | 2.13 | 15    | 23   | 65   | 53  | 53    | 56  | 51  | 63    |
| 12 | 14 | 10   | 18   | 16 | 7.20  | 1.33 | 17    | 31   | 64   | 46  | 56    | 50  | 48  | 60    |
| 16 | 26 |      | 28   | 19 | 7.11  | 2.48 | 17    | 36   | 66   | 56  | 56    | 62  | 71  |       |
| 12 | 19 | 16   | 8    | 21 | 7.61  | 1.46 | 16    | 29   | 54   | 46  | 55    | 50  | 57  | 67    |
| 15 | 27 | 3    | 23   | 16 | 10.59 | 1.95 | 18    | 33   | 48   | 53  | 62    | 59  | 73  | 44    |
| 13 | 21 | 12   | 26   | 25 | 11.18 | 2.41 | 17    | 38   | 57   | 73  | 66    | 53  | 61  | 63    |
| 14 | 12 | 9    | 14   | 18 | 4.22  | 1.75 | 13    | 34   | 56   | 43  | 56    | 56  | 44  | 59    |
| 14 | 12 | 5    | 12   | 25 | 8.10  | 1.14 | 12    | 34   | 54   | 51  | 58    | 56  | 44  | 50    |
| 13 | 13 | 9    | 20   | 19 | 6.67  | 0.61 | 11    | 19   | 48   | 40  | 47    | 53  | 46  | 59    |
| 14 | 19 | 9    | 30   | 25 | 7.45  | 2.20 | 20    | 36   | 57   | 64  | 73    | 56  | 57  | 59    |
| 5  | 5  | 7    | 34   | 16 | 6.30  | 1.10 | 15    | 21   | 48   | 45  | 47    | 30  | 30  | 55    |
| 10 | 18 | 10   | 26   | 10 | 10.56 | 1.90 | 15    | 30   | 58   | 49  | 69    | 44  | 55  | 60    |
| 10 | 13 | 8    | 18   | 17 | 8.18  | 1.66 | 7     | 25   | 50   | 56  | 58    | 44  | 46  | 57    |
| 12 | 19 | 6    | 22   | 22 | 9.24  | 1.58 | 16    | 38   | 50   | 49  | 56    | 50  | 57  | 53    |
| 19 | 21 | 21   | 30   | 23 | 8.49  | 2.49 | 17    | 36   | 57   | 63  | 64    | 70  | 61  | 71    |
| 11 | 14 | 5    | 24   | 24 | 9.30  | 1.34 | 17    | 17   | 46   | 50  | 55    | 47  | 48  | 50    |
| 13 | 17 |      | 19   | 16 | 8.22  | 2.67 | 11    | 25   | 50   | 40  | 53    | 53  | 53  |       |
| 20 | 27 | 21   | 25   | 28 | 9.05  | 3.50 | 19    | 38   | 78   | 65  | 56    | 73  | 73  | 71    |
| 10 | 21 | 9    | 27   | 17 | 8.04  | 1.87 | 15    | 32   | 52   | 60  | 62    | 44  | 61  | 59    |
| 15 | 22 | 12   | 21   | 18 | 10.11 | 2.99 | 22    | 29   | 56   | 63  | 64    | 59  | 63  | 63    |
| 14 | 18 |      | 21   | 22 | 10.10 | 1.21 | 18    | 30   | 44   | 47  | 51    | 56  | 55  |       |
| 13 | 12 |      | 10   | 12 | 5.55  | 1.66 | 10    | 14   | 51   | 44  | 47    | 53  | 44  |       |
| 16 | 17 | 14   | 18   | 18 | 8.09  | 1.84 | 12    | 33   | 48   | 49  | 56    | 62  | 53  | 65    |
| 13 | 15 | 8    | 17   | 27 | 9.36  | 0.96 | 17    | 23   | 46   | 61  | 60    | 53  | 49  | 57    |
| 13 | 14 | 8    | 22   | 13 | 8.27  | 0.70 | 12    | 15   | 34   | 37  | 45    | 53  | 48  | 57    |

|    |    |    |    |    |       |      |    |    |    |    |    |    |    |    |
|----|----|----|----|----|-------|------|----|----|----|----|----|----|----|----|
| 16 | 20 | 5  | 22 | 19 | 8.45  | 2.81 | 12 | 32 | 50 | 68 | 62 | 62 | 59 | 50 |
| 16 | 15 | 10 | 25 | 25 | 6.62  | 2.31 | 16 | 34 | 54 | 38 | 51 | 62 | 49 | 60 |
| 10 | 15 |    | 13 | 15 | 7.42  | 1.44 | 11 | 31 | 43 | 40 | 53 | 44 | 49 |    |
| 21 | 28 | 23 | 30 | 33 | 8.84  | 2.94 | 23 | 31 | 50 | 65 | 71 | 76 | 75 | 73 |
| 13 | 22 | 5  | 26 | 14 | 6.90  | 1.52 | 16 | 36 | 47 | 47 | 44 | 53 | 63 | 50 |
| 20 | 18 | 7  | 28 | 17 | 11.44 | 2.87 | 16 | 34 | 51 | 60 | 62 | 73 | 55 | 55 |
| 11 | 16 | 8  | 16 | 18 | 7.07  | 2.24 | 15 | 23 | 56 | 52 | 47 | 47 | 51 | 57 |
| 11 | 14 | 6  | 12 | 9  | 8.57  | 2.01 | 11 | 26 | 50 | 51 | 44 | 47 | 48 | 53 |
| 11 | 25 | 5  | 27 | 20 | 8.59  | 1.64 | 18 | 27 | 59 | 46 | 38 | 47 | 69 | 50 |
| 13 | 21 | 8  | 14 | 18 | 7.50  | 2.68 | 17 | 23 | 51 | 60 | 49 | 53 | 61 | 57 |
| 14 | 17 | 5  | 28 | 18 | 10.81 | 1.43 | 15 | 26 | 44 | 49 | 49 | 56 | 53 | 50 |
| 12 | 22 | 8  | 18 | 20 | 8.89  | 2.30 | 18 | 33 | 62 | 63 | 71 | 50 | 63 | 57 |
| 13 | 10 | 1  | 3  | 9  | 7.95  | 0.75 | 9  | 2  | 37 | 35 | 44 | 53 | 40 | 32 |
| 13 | 20 | 9  | 25 | 15 | 12.28 | 1.75 | 19 | 29 | 62 | 53 | 47 | 53 | 59 | 59 |
| 15 | 24 | 7  | 17 | 17 | 6.55  | 2.87 | 23 | 32 | 49 | 49 | 55 | 59 | 67 | 55 |
| 14 | 22 | 4  | 7  | 16 | 8.34  | 1.42 | 12 | 31 | 46 | 43 | 34 | 56 | 63 | 47 |
| 13 | 23 | 7  | 28 | 20 | 10.01 | 3.01 | 22 | 36 | 52 | 58 | 47 | 53 | 65 | 55 |
| 2  | 12 | 2  | 6  | 21 | 8.12  | 0.74 | 12 | 8  | 41 |    | 29 | 22 | 44 | 39 |
| 9  | 17 | 5  | 21 | 20 | 8.42  | 1.62 | 15 | 36 | 51 | 56 | 56 | 42 | 53 | 50 |
| 16 | 18 | 6  | 13 | 18 | 9.46  | 2.37 | 17 | 23 | 40 | 51 | 58 | 62 | 55 | 53 |
| 17 | 23 | 11 | 18 | 18 | 9.36  | 2.40 | 22 | 29 | 69 | 56 | 58 | 64 | 65 | 62 |
| 12 | 15 | 6  | 20 | 24 | 10.83 | 2.82 | 20 | 29 | 51 | 58 | 45 | 50 | 49 | 53 |
| 23 | 27 | 24 | 28 | 29 | 7.95  | 1.78 | 25 | 36 | 59 | 77 | 62 | 82 | 73 | 74 |
| 17 | 25 | 10 | 16 | 19 | 9.25  | 1.97 | 19 | 36 | 49 | 51 | 62 | 64 | 69 | 60 |
| 6  | 18 | 3  | 3  | 17 | 8.78  | 1.35 | 13 | 31 | 44 | 50 | 34 | 33 | 55 | 44 |
| 19 | 21 | 9  | 30 | 27 | 10.56 | 2.29 | 19 | 38 | 53 | 70 | 68 | 70 | 61 | 59 |
| 15 | 18 | 9  | 26 | 29 | 7.37  | 1.18 | 17 | 31 | 59 | 60 | 56 | 59 | 55 | 59 |
| 10 | 9  | 8  | 15 | 11 | 7.66  | 1.13 | 9  | 18 | 45 | 46 | 31 | 44 | 38 | 57 |
| 18 | 21 | 5  | 27 | 31 | 8.96  | 3.58 | 24 | 38 | 64 | 60 | 51 | 67 | 61 | 50 |
| 17 | 15 | 17 | 18 | 24 | 7.87  | 2.03 | 15 | 25 | 54 | 58 | 60 | 64 | 49 | 68 |
| 10 | 8  | 3  | 4  | 4  | 7.09  | 0.44 | 9  | 12 | 34 | 33 | 36 | 44 | 36 | 44 |
| 7  | 11 | 3  | 3  | 15 | 8.24  | 1.28 | 13 | 12 | 37 | 41 | 47 | 36 | 42 | 44 |
| 11 | 22 | 11 | 35 | 10 | 9.33  | 1.69 | 16 | 25 | 46 | 43 | 62 | 47 | 63 | 62 |
| 2  | 5  | 4  | 8  | 11 | 6.67  | 1.77 | 15 | 21 | 46 | 56 | 51 | 22 | 30 | 47 |
| 14 | 25 | 13 | 22 | 27 | 12.68 | 2.57 | 20 | 38 | 65 | 59 | 56 | 56 | 69 | 64 |
| 13 | 15 | 5  | 25 | 19 | 6.66  | 2.80 | 17 | 27 | 72 | 60 | 62 | 53 | 49 | 50 |
| 11 | 17 | 4  | 18 | 7  | 9.81  | 2.23 | 16 | 34 | 48 | 53 | 51 | 47 | 53 | 47 |
| 16 | 17 | 5  | 9  | 9  | 8.14  | 1.55 | 13 | 20 | 48 | 48 | 53 | 62 | 53 | 50 |
| 13 | 21 | 3  | 27 | 23 | 10.84 | 2.67 | 15 | 38 | 52 | 60 | 62 | 53 | 61 | 44 |
| 16 | 19 | 19 | 22 | 15 | 9.48  | 2.61 | 21 | 34 | 52 | 65 | 66 | 62 | 57 | 70 |
|    | 16 | 1  | 19 | 7  | 7.23  | 0.80 | 8  | 15 | 39 | 44 | 49 |    | 51 | 32 |
| 10 | 14 | 5  | 7  | 16 | 8.57  | 1.47 | 15 | 27 | 50 | 49 | 44 | 44 | 48 | 50 |
| 14 | 21 | 9  | 20 | 28 | 10.47 | 3.09 | 16 | 38 | 53 | 58 | 53 | 56 | 61 | 59 |
| 15 | 4  | 2  | 32 | 16 | 7.60  | 1.67 | 12 | 28 | 51 | 49 | 56 | 59 | 28 | 39 |
| 17 | 18 | 16 | 11 | 13 | 8.63  | 1.04 | 15 | 13 | 45 | 43 | 47 | 64 | 55 | 67 |
| 16 | 24 | 14 | 29 | 27 | 9.82  | 3.35 | 19 | 36 | 60 | 60 | 69 | 62 | 67 | 65 |
| 17 | 18 | 7  | 21 | 14 | 6.51  | 1.22 | 17 | 29 | 57 | 59 | 49 | 64 | 55 | 55 |
| 5  | 15 | 5  | 21 | 25 | 10.62 | 1.16 | 12 | 16 | 60 | 49 | 53 | 30 | 49 | 50 |
| 16 | 18 | 7  | 13 | 16 | 6.36  | 2.88 | 18 | 38 | 60 | 52 | 58 | 62 | 55 | 55 |
| 13 | 12 | 3  | 5  | 25 | 7.37  | 2.47 | 11 | 27 | 43 | 40 | 53 | 53 | 44 | 44 |
| 15 | 20 | 9  | 4  | 15 | 6.30  | 2.25 | 18 | 21 | 52 | 45 | 40 | 59 | 59 | 59 |
| 16 | 18 | 11 | 16 | 37 | 7.88  | 2.05 | 14 | 25 | 51 | 44 | 58 | 62 | 55 | 62 |
| 7  | 13 | 5  | 15 | 26 | 7.83  | 1.58 | 12 | 27 | 56 | 55 | 53 | 36 | 46 | 50 |
| 15 | 11 | 2  | 8  | 19 | 7.19  | 1.35 | 14 | 28 | 55 | 39 | 47 | 59 | 42 | 39 |
| 9  | 11 | 2  | 6  | 14 | 7.91  | 1.83 | 10 | 25 | 42 | 44 | 34 | 42 | 42 | 39 |
| 12 | 4  | 4  | 6  | 18 | 10.15 | 1.53 | 12 | 21 | 42 | 39 | 36 | 50 | 28 | 47 |
| 8  | 8  | 6  | 15 | 12 | 5.88  | 0.70 | 6  | 10 | 36 | 46 | 44 | 39 | 36 | 53 |
| 6  | 13 | 11 | 15 | 19 | 9.35  | 1.80 | 19 | 38 | 63 | 46 | 45 | 33 | 46 | 62 |
| 17 | 28 | 4  | 31 | 22 | 7.57  | 2.96 | 15 | 40 | 58 | 63 | 66 | 64 | 75 | 47 |
| 7  | 9  | 2  | 8  | 11 | 6.43  | 0.57 | 7  | 21 | 32 | 39 | 47 | 36 | 38 | 39 |
| 12 | 18 | 3  | 14 | 20 | 10.60 | 1.08 | 13 | 36 | 50 | 46 | 49 | 50 | 55 | 44 |
| 11 | 10 | 4  | 21 | 12 | 8.78  | 1.38 | 12 | 23 | 50 | 47 | 53 | 47 | 40 | 47 |

|    |    |    |    |    |       |      |    |    |    |    |    |    |    |    |
|----|----|----|----|----|-------|------|----|----|----|----|----|----|----|----|
| 9  | 15 | 1  | 12 | 10 | 9.15  | 1.86 | 13 | 17 | 60 | 56 | 51 | 42 | 49 | 32 |
| 15 | 13 | 5  | 7  | 23 | 8.39  | 1.62 | 16 | 36 | 49 | 49 | 53 | 59 | 46 | 50 |
| 18 | 23 | 7  | 21 | 19 | 9.18  | 2.04 | 15 | 34 | 38 | 49 | 55 | 67 | 65 | 55 |
| 9  | 23 | 2  | 18 | 21 | 11.14 | 2.64 | 16 | 29 | 54 | 50 | 51 | 42 | 65 | 39 |
| 9  | 24 | 7  | 20 | 13 | 9.06  | 1.80 | 13 | 23 | 57 | 51 | 49 | 42 | 67 | 55 |
| 17 | 24 | 10 | 21 | 21 | 7.30  | 1.32 | 13 | 16 | 45 | 51 | 53 | 64 | 67 | 60 |
| 6  | 13 | 3  | 17 | 17 | 4.94  | 1.19 | 15 | 36 | 46 | 43 | 44 | 33 | 46 | 44 |
| 15 | 19 | 13 | 24 | 21 | 7.32  | 3.96 | 18 | 38 | 53 | 68 | 66 | 59 | 57 | 64 |
| 18 | 23 | 7  | 27 | 27 | 8.66  | 2.65 | 27 | 40 | 59 | 60 | 64 | 67 | 65 | 55 |
| 17 | 25 | 9  | 22 | 21 | 7.17  | 2.82 | 27 | 33 | 56 | 74 | 68 | 64 | 69 | 59 |
| 19 | 17 | 9  | 17 | 18 | 9.87  | 1.65 | 16 | 25 | 50 | 55 | 62 | 70 | 53 | 59 |
| 19 | 13 | 9  | 17 | 18 | 7.18  | 1.51 | 15 | 25 | 44 | 38 | 60 | 70 | 46 | 59 |
| 12 | 17 | 11 | 28 | 18 | 8.98  | 2.66 | 16 | 36 | 63 | 60 | 53 | 50 | 53 | 62 |
| 16 | 25 | 9  | 14 | 11 | 5.92  | 2.12 | 12 | 36 | 61 | 51 | 55 | 62 | 69 | 59 |
| 15 | 19 | 7  | 21 | 12 | 9.72  | 2.61 | 20 | 36 | 53 | 63 | 58 | 59 | 57 | 55 |
| 13 | 16 | 1  | 8  | 5  | 7.61  | 1.55 | 15 | 14 | 38 | 48 | 49 | 53 | 51 | 32 |
| 19 | 24 | 22 | 29 | 29 | 8.17  | 2.16 | 17 | 36 | 54 | 62 | 62 | 70 | 67 | 72 |
| 11 | 18 | 25 | 23 | 33 | 10.39 | 2.46 | 17 | 38 | 56 | 71 | 62 | 47 | 55 | 74 |
| 20 | 27 | 14 | 25 | 18 | 9.88  | 3.01 | 24 | 36 | 55 | 77 | 69 | 73 | 73 | 65 |
| 14 | 14 | 4  | 13 | 17 | 5.91  | 1.30 |    |    | 41 | 49 | 42 | 56 | 48 | 47 |
| 14 | 20 | 16 | 17 | 23 | 6.96  | 2.97 |    |    | 59 | 56 | 45 | 56 | 59 | 67 |
| 16 | 18 | 21 | 33 | 24 | 10.28 | 1.87 |    |    | 58 | 53 | 62 | 62 | 55 | 71 |
| 15 | 23 | 19 | 24 | 25 | 6.89  | 2.67 | 20 | 29 | 65 | 63 | 49 | 59 | 65 | 70 |
| 13 | 17 | 8  | 21 | 17 | 9.94  | 1.93 | 21 | 36 | 55 | 51 | 64 | 53 | 53 | 57 |
| 20 | 12 | 21 | 25 | 19 | 7.80  | 2.54 | 17 | 36 | 66 | 68 | 66 | 73 | 44 | 71 |
| 20 | 24 | 23 | 30 | 19 | 9.46  | 3.39 | 22 | 36 | 64 | 71 | 68 | 73 | 67 | 73 |
| 15 | 26 | 19 | 27 | 18 | 10.65 | 3.73 | 21 | 36 | 64 | 72 | 64 | 59 | 71 | 70 |
| 16 | 21 | 5  | 19 | 17 | 8.21  | 1.51 |    |    | 45 | 45 | 55 | 62 | 61 | 50 |
| 22 | 26 | 16 | 34 | 33 | 9.50  | 3.95 | 21 | 38 | 72 | 83 | 69 | 79 | 71 | 67 |
| 19 | 28 | 21 | 27 | 27 | 7.14  | 2.70 | 18 | 38 | 56 | 61 | 58 | 70 | 75 | 71 |
| 22 | 25 | 13 | 33 | 32 | 11.17 | 2.77 | 27 | 40 | 51 | 68 | 77 | 79 | 69 | 64 |
| 18 | 25 | 25 | 24 | 30 | 8.11  | 2.95 | 21 | 36 | 70 | 69 | 60 | 67 | 69 | 74 |
| 18 | 19 | 7  | 20 | 23 | 10.51 | 2.49 |    |    | 55 | 53 | 58 | 67 | 57 | 55 |
| 15 | 21 | 19 | 27 | 26 | 11.08 | 2.38 | 19 | 38 | 62 | 62 | 71 | 59 | 61 | 70 |
| 18 | 23 | 16 | 28 | 21 | 9.19  | 3.43 | 20 | 38 | 67 | 65 | 64 | 67 | 65 | 67 |
| 20 | 20 | 18 | 20 | 15 | 8.11  | 2.19 | 19 | 33 | 55 | 57 | 62 | 73 | 59 | 69 |
| 19 | 19 | 25 | 14 | 18 | 10.54 | 2.83 | 20 | 40 | 83 | 74 | 75 | 70 | 57 | 74 |
| 16 | 23 | 19 | 33 | 26 | 8.84  | 3.29 | 23 | 38 | 68 | 70 | 71 | 62 | 65 | 70 |
| 17 | 11 | 25 | 13 | 25 | 6.16  | 2.28 | 15 | 33 | 65 | 58 | 53 | 64 | 42 | 74 |
| 12 | 15 | 19 | 24 | 18 | 5.16  | 2.37 | 17 | 34 | 58 | 70 | 53 | 50 | 49 | 70 |
| 20 | 26 | 21 | 29 | 29 | 8.74  | 3.31 | 26 | 36 | 63 | 72 | 73 | 73 | 71 | 71 |
| 16 | 26 | 10 | 17 | 33 | 9.33  | 3.10 | 21 | 38 | 65 | 56 | 56 | 62 | 71 | 60 |
| 15 | 21 | 17 | 27 | 18 | 9.07  | 2.21 | 20 | 36 | 53 | 56 | 56 | 59 | 61 | 68 |
| 15 | 18 | 10 | 25 | 18 | 8.55  | 2.29 | 13 | 36 | 59 | 65 | 64 | 59 | 55 | 60 |
| 15 | 23 | 15 | 25 | 24 | 10.98 | 2.97 | 18 | 38 | 64 | 64 | 64 | 59 | 65 | 66 |
| 17 | 21 | 14 | 22 | 20 | 8.44  | 1.97 | 18 | 34 | 45 | 61 | 60 | 64 | 61 | 65 |
| 16 | 28 | 22 | 31 | 38 | 8.94  | 3.58 | 18 | 38 | 61 | 66 | 75 | 62 | 75 | 72 |
| 17 | 18 | 10 | 16 | 15 | 8.25  | 2.46 | 16 | 40 | 54 | 60 | 66 | 64 | 55 | 60 |
| 15 | 25 | 21 | 23 | 44 | 7.69  | 2.52 | 14 | 36 | 63 | 60 | 69 | 59 | 69 | 71 |
| 17 | 20 | 10 | 29 | 22 | 9.16  | 3.33 | 23 | 38 | 58 | 72 | 64 | 64 | 59 | 60 |
| 15 | 25 | 12 | 20 | 35 | 10.99 | 2.65 | 17 | 38 | 60 | 52 | 62 | 59 | 69 | 63 |
| 20 | 21 | 18 | 28 | 23 | 11.86 | 2.23 | 15 | 36 | 63 | 70 | 69 | 73 | 61 | 69 |
| 19 | 23 | 18 | 23 | 21 | 8.78  | 2.40 | 21 | 40 | 68 | 70 | 68 | 70 | 65 | 69 |
| 15 | 24 | 10 | 23 | 19 | 10.63 | 3.51 | 19 | 40 | 74 | 50 | 68 | 59 | 67 | 60 |
| 16 | 19 | 13 | 25 | 28 | 8.26  | 2.53 | 22 | 40 | 59 | 61 | 66 | 62 | 57 | 64 |
| 20 | 26 | 23 | 30 | 24 | 8.82  | 3.61 | 29 | 31 | 65 | 73 | 69 | 73 | 71 | 73 |
| 19 | 19 | 25 | 24 | 23 | 10.95 | 2.12 | 19 | 38 | 65 | 72 | 55 | 70 | 57 | 74 |
| 14 | 25 | 26 | 35 | 29 | 11.34 | 3.36 | 22 | 38 | 57 | 68 | 80 | 56 | 69 | 75 |
| 16 | 16 | 8  | 26 | 15 | 7.62  | 1.65 | 14 | 29 | 53 | 47 | 53 | 62 | 51 | 57 |
| 13 | 22 | 19 | 32 | 25 | 8.77  | 2.62 | 22 | 38 | 65 | 69 | 66 | 53 | 63 | 70 |
| 16 | 18 | 20 | 28 | 20 | 6.73  | 3.27 | 15 | 29 | 50 | 74 | 55 | 62 | 55 | 71 |
| 21 | 25 | 18 | 32 | 16 | 9.89  | 3.29 | 23 | 34 | 56 | 70 | 73 | 76 | 69 | 69 |

|    |    |    |    |    |       |      |    |    |    |    |    |    |    |    |
|----|----|----|----|----|-------|------|----|----|----|----|----|----|----|----|
| 14 | 23 | 13 | 20 | 25 | 10.95 | 2.47 | 27 | 36 | 55 | 56 | 53 | 56 | 65 | 64 |
| 17 | 24 | 9  | 25 | 21 | 12.09 | 3.17 | 27 | 38 | 66 | 68 | 64 | 64 | 67 | 59 |
| 21 | 28 | 20 | 28 | 35 | 8.14  | 3.53 | 27 | 38 | 58 | 77 | 71 | 76 | 75 | 71 |
| 23 | 18 | 16 | 20 | 26 | 10.17 | 2.04 | 20 | 36 | 52 | 65 | 51 | 82 | 55 | 67 |
| 17 | 21 | 14 | 26 | 26 | 9.42  | 2.77 | 17 | 40 | 56 | 55 | 77 | 64 | 61 | 65 |

| bvmtt | cft | eitt  | cptt | mccbt | stroopid | spantupsat | S1L   | S2L   | S1V   | S2V   | S2divi | SMOKE | Smokin |    |
|-------|-----|-------|------|-------|----------|------------|-------|-------|-------|-------|--------|-------|--------|----|
| 48    | 43  | 59.50 | 43   |       |          | 37         | 34.78 | 34.00 | 32.00 | 2.37  | 1.38   | 0.58  | 1      |    |
| 73    | 58  | 48.80 | 64   | 78    | 65       | 78         | 55.21 | 54.00 | 62.00 | 2.99  | 0.55   | 0.18  | 2      | 8  |
| 47    | 41  | 47.57 | 42   | 49    | 58       |            |       | 64.00 | 40.00 | 2.72  | 0.00   | 0.00  |        |    |
| 69    | 68  | 64.91 | 65   | 82    | 62       | 67         | 58.81 | 66.00 | 60.00 | 4.42  | -0.83  | -0.19 | 1      |    |
| 69    | 98  | 60.13 | 67   | 83    | 69       | 75         | 66.63 | 56.00 | 80.00 | 3.33  | 0.00   | 0.00  | 2      | 13 |
| 64    | 51  | 41.59 | 46   | 48    | 53       | 48         | 55.21 | 54.00 | 56.00 | 5.17  | 3.30   | 0.64  | 1      |    |
| 64    | 66  | 49.84 | 41   | 59    | 56       | 61         | 62.62 | 58.00 | 48.00 | 2.54  | 1.28   | 0.50  | 1      |    |
| 63    | 47  | 48.37 | 37   | 48    | 51       | 37         | 25.91 | 56.00 | 54.00 | 2.26  | 1.04   | 0.46  | 1      |    |
| 64    | 49  | 62.20 | 63   | 73    | 61       | 75         | 62.62 | 64.00 | 40.00 | 2.51  | 0.00   | 0.00  | 1      |    |
| 73    | 57  | 63.30 | 61   | 77    | 65       | 78         | 62.62 | 64.00 | 64.00 | 5.04  | 1.42   | 0.28  | 1      |    |
| 46    | 43  | 51.78 | 56   |       | 40       | 39         | 58.81 | 46.00 | 50.00 | 4.28  | 2.48   | 0.58  | 1      |    |
| 62    | 62  | 47.16 | 58   | 63    | 47       | 50         | 62.62 | 56.00 | 50.00 | 2.65  | 0.40   | 0.15  | 2      | 35 |
| 52    | 47  | 35.73 | 48   | 48    | 38       | 48         | 44.24 | 54.00 | 46.00 | 3.94  | 1.60   | 0.41  | 2      | 10 |
| 68    | 55  | 54.46 | 48   | 58    | 60       | 59         | 51.82 | 46.00 | 50.00 | 3.36  | 0.53   | 0.16  | 2      | 30 |
| 46    | 57  | 43.46 | 54   | 50    | 42       | 50         | 55.21 | 52.00 | 50.00 | 7.74  | 2.59   | 0.33  | 2      | 20 |
| 40    | 51  | 57.68 | 55   | 54    | 35       | 67         | 55.21 | 52.00 | 50.00 | 3.87  | 2.24   | 0.58  | 2      |    |
| 53    | 47  | 47.83 | 53   | 55    | 65       | 50         | 50.20 | 52.00 | 40.00 | 2.28  | 0.00   | 0.00  | 1      |    |
| 64    | 49  | 61.70 | 54   | 70    | 51       | 61         | 58.81 | 60.00 | 52.00 | 7.25  | 1.77   | 0.24  | 2      | 10 |
| 65    | 58  | 45.36 | 50   | 61    | 62       | 59         | 55.21 | 54.00 | 58.00 | 4.00  | -0.95  | -0.24 | 1      |    |
| 51    | 64  | 48.83 | 57   | 61    | 55       | 42         | 36.83 | 62.00 | 62.00 | 3.51  | 2.55   | 0.73  | 1      |    |
| 44    | 53  | 48.42 | 42   | 47    | 46       | 48         | 31.28 | 54.00 | 54.00 | 4.98  | 3.41   | 0.68  | 1      |    |
| 70    | 53  | 50.37 | 55   | 74    | 73       | 59         | 62.62 | 62.00 | 60.00 | 3.38  | 1.36   | 0.40  | 1      |    |
| 61    | 72  | 50.70 | 48   |       | 52       | 48         | 58.81 | 52.00 | 48.00 | 5.64  | 2.66   | 0.47  |        |    |
| 56    | 45  | 37.47 | 50   | 45    | 53       | 39         | 31.28 | 62.00 | 64.00 | 1.96  | 1.86   | 0.95  | 1      |    |
| 47    | 64  | 61.49 | 54   | 67    | 57       | 72         | 62.62 | 56.00 | 60.00 | 4.92  | 0.67   | 0.14  | 2      | 27 |
| 68    | 70  | 55.16 | 66   | 78    | 62       | 78         | 55.21 | 66.00 | 68.00 | 2.07  | 0.08   | 0.04  | 1      |    |
| 53    | 53  | 43.28 | 63   | 61    | 53       | 67         | 55.21 | 52.00 | 52.00 | 6.41  | -1.27  | -0.20 | 2      |    |
| 49    | 47  | 52.73 | 47   | 46    | 52       | 48         | 51.82 | 50.00 | 74.00 | 3.53  | 0.00   | 0.00  | 1      |    |
| 57    | 57  | 44.33 | 52   | 51    | 48       | 42         | 41.56 | 54.00 | 56.00 | 2.64  | 4.89   | 1.86  | 1      |    |
| 48    | 38  | 46.73 | 49   | 51    | 32       | 42         | 28.07 | 54.00 | 58.00 | 3.93  | 1.89   | 0.48  | 2      |    |
| 43    | 41  | 46.55 | 51   |       | 44       | 42         | 58.81 | 56.00 | 54.00 | 6.69  | 4.08   | 0.61  | 1      |    |
| 63    | 53  | 56.52 | 63   | 66    | 61       | 53         | 58.81 | 62.00 | 60.00 | 4.46  | 2.21   | 0.50  | 2      | 37 |
| 49    | 55  | 45.82 | 61   | 62    | 60       | 59         | 47.12 | 48.00 | 48.00 | 2.55  | 1.75   | 0.69  | 2      | 4  |
| 65    | 40  | 45.28 | 57   | 57    | 47       | 37         | 51.82 | 58.00 | 64.00 | 1.48  | 0.12   | 0.08  | 1      |    |
| 58    | 58  | 53.24 | 54   | 59    | 59       | 59         | 58.81 | 56.00 | 52.00 | 2.92  | 1.16   | 0.40  | 2      | 15 |
| 49    | 49  | 41.15 | 53   | 55    | 50       | 50         | 39.10 | 50.00 | 40.00 | 7.72  | 2.32   | 0.30  | 1      |    |
| 52    | 45  | 43.54 | 45   | 52    | 53       | 56         | 50.20 | 56.00 | 64.00 | 3.67  | 1.14   | 0.31  | 1      |    |
| 64    | 51  | 43.04 | 57   |       | 62       | 56         | 58.81 | 68.00 | 72.00 | 5.00  | 1.38   | 0.28  | 1      |    |
| 40    | 55  | 45.77 | 46   | 52    | 52       | 53         | 47.12 | 52.00 | 48.00 | 7.85  | 4.84   | 0.62  | 2      | 30 |
| 58    | 45  | 61.74 | 51   | 60    | 41       | 59         | 53.49 | 48.00 | 48.00 | 7.16  | 2.06   | 0.29  | 1      |    |
| 62    | 62  | 64.94 | 56   | 69    | 52       | 56         | 62.62 | 42.00 | 46.00 | 1.63  | 1.31   | 0.80  | 1      |    |
| 47    | 49  | 27.56 | 49   | 47    | 31       | 45         | 55.21 | 54.00 | 80.00 | 2.26  | 0.00   | 0.00  | 2      | 30 |
| 44    | 62  | 48.40 | 43   | 50    | 47       | 42         | 55.21 | 56.00 | 70.00 | 0.79  | 0.00   | 0.00  | 2      |    |
| 54    | 51  | 40.70 | 37   | 46    | 43       | 39         | 34.78 | 52.00 | 50.00 | 5.46  | 1.89   | 0.35  | 1      |    |
| 67    | 62  | 44.90 | 54   | 65    | 57       | 64         | 58.81 | 52.00 | 52.00 | 6.52  | 2.26   | 0.35  | 1      |    |
| 72    | 45  | 38.73 | 42   | 44    | 53       | 50         | 36.83 | 54.00 | 54.00 | 3.50  | 1.88   | 0.54  | 1      |    |
| 62    | 34  | 61.59 | 51   | 61    | 51       | 50         | 48.63 | 64.00 | 66.00 | 1.42  | -0.09  | -0.06 | 1      |    |
| 52    | 47  | 48.82 | 48   | 52    | 26       | 28         | 41.56 | 50.00 | 48.00 | 2.57  | 1.64   | 0.64  | 2      | 30 |
| 57    | 57  | 54.53 | 48   | 55    | 51       | 53         | 62.62 | 48.00 | 48.00 | 1.46  | 1.04   | 0.71  | 1      |    |
| 67    | 58  | 50.49 | 57   | 70    | 56       | 56         | 58.81 | 62.00 | 58.00 | 2.93  | 0.70   | 0.24  | 1      |    |
| 59    | 60  | 54.85 | 45   | 53    | 49       | 56         | 32.93 | 44.00 | 48.00 | 3.64  | 2.22   | 0.61  | 1      |    |
| 53    | 45  | 49.04 | 59   |       | 53       | 39         | 41.56 | 60.00 | 56.00 | 2.85  | -0.10  | -0.03 | 1      |    |
| 61    | 68  | 53.48 | 68   | 75    | 38       | 61         | 62.62 | 52.00 | 52.00 | 2.37  | 1.51   | 0.64  | 2      | 5  |
| 63    | 47  | 48.08 | 51   | 59    | 71       | 50         | 51.82 | 58.00 | 56.00 | 5.35  | 1.25   | 0.23  | 1      |    |
| 56    | 49  | 59.18 | 63   | 67    | 53       | 70         | 47.12 | 52.00 | 40.00 | 2.99  | 0.00   | 0.00  | 2      | 16 |
| 56    | 57  | 59.12 | 43   |       | 51       | 59         | 48.63 | 52.00 | 52.00 | 10.50 | 5.04   | 0.48  | 1      |    |
| 42    | 38  | 34.67 | 48   |       | 49       | 37         | 30.53 | 48.00 | 54.00 | 4.19  | 3.26   | 0.78  | 1      |    |
| 52    | 49  | 48.34 | 50   | 57    | 48       | 42         | 53.49 | 62.00 | 68.00 | 0.75  | 0.85   | 1.14  | 1      |    |
| 51    | 66  | 55.13 | 41   | 55    | 59       | 56         | 39.10 | 60.00 | 46.00 | 2.34  | 0.00   | 0.00  | 2      | 17 |
| 57    | 40  | 49.28 | 38   | 46    | 33       | 42         | 31.28 | 48.00 | 48.00 | 6.58  | 1.54   | 0.23  | 1      |    |

|    |    |       |    |    |    |    |       |       |       |       |       |       |   |    |
|----|----|-------|----|----|----|----|-------|-------|-------|-------|-------|-------|---|----|
| 57 | 51 | 50.27 | 61 | 61 | 67 | 42 | 51.82 | 52.00 | 58.00 | 3.50  | 0.42  | 0.12  | 1 |    |
| 61 | 62 | 40.43 | 55 | 56 | 52 | 53 | 55.21 | 60.00 | 56.00 | 3.35  | 0.25  | 0.08  | 2 | 40 |
| 46 | 43 | 44.75 | 46 |    | 51 | 39 | 50.20 | 58.00 | 78.00 | 0.62  | 0.00  | 0.00  | 1 |    |
| 67 | 77 | 52.35 | 62 | 78 | 76 | 72 | 50.20 | 54.00 | 52.00 | 7.32  | 6.49  | 0.89  | 1 |    |
| 62 | 41 | 41.92 | 47 | 50 | 57 | 53 | 58.81 | 58.00 | 60.00 | 4.22  | 1.34  | 0.32  | 2 | 42 |
| 64 | 47 | 66.35 | 62 | 68 | 53 | 53 | 55.21 | 54.00 | 76.00 | 6.62  | 0.00  | 0.00  | 1 |    |
| 49 | 49 | 42.86 | 55 | 51 | 51 | 50 | 39.10 | 50.00 | 46.00 | 3.17  | 1.65  | 0.52  |   |    |
| 44 | 32 | 50.89 | 52 | 46 | 41 | 39 | 42.87 | 40.00 | 56.00 | 1.87  | 0.00  | 0.00  | 1 |    |
| 63 | 53 | 51.02 | 48 | 53 | 53 | 59 | 44.24 | 62.00 | 60.00 | 2.69  | 1.50  | 0.56  | 1 |    |
| 47 | 49 | 45.16 | 59 | 54 | 52 | 56 | 39.10 | 50.00 | 52.00 | 5.40  | 4.04  | 0.75  | 1 |    |
| 64 | 49 | 62.92 | 46 | 55 | 35 | 50 | 42.87 | 54.00 | 74.00 | 1.62  | 0.00  | 0.00  | 2 | 40 |
| 52 | 53 | 52.65 | 55 | 63 | 59 | 59 | 53.49 | 54.00 | 54.00 | 4.20  | 1.56  | 0.37  | 1 |    |
| 33 | 32 | 47.59 | 38 | 33 | 35 | 34 | 25.60 | 58.00 | 58.00 | 6.65  | 3.46  | 0.52  | 1 |    |
| 61 | 43 | 70.82 | 49 | 61 | 69 | 61 | 47.12 | 54.00 | 56.00 | 3.41  | 1.36  | 0.40  | 1 |    |
| 51 | 47 | 40.06 | 62 | 56 | 47 | 72 | 51.82 | 56.00 | 52.00 | 3.11  | 1.19  | 0.38  | 1 |    |
| 38 | 45 | 49.67 | 46 | 43 |    | 42 | 50.20 | 50.00 | 60.00 | 2.26  | 0.68  | 0.30  | 2 | 35 |
| 64 | 53 | 58.63 | 63 | 62 | 57 | 70 | 58.81 | 52.00 | 66.00 | 2.58  | 0.00  | 0.00  | 1 |    |
| 37 | 55 | 48.51 | 38 |    | 31 | 42 | 27.14 | 56.00 | 50.00 | 1.18  | 0.92  | 0.78  | 2 | 13 |
| 56 | 53 | 50.13 | 48 | 52 | 57 | 50 | 58.81 | 48.00 | 66.00 | 2.82  | 0.00  | 0.00  | 1 |    |
| 46 | 49 | 55.67 | 56 | 55 | 59 | 56 | 39.10 | 52.00 | 52.00 | 6.43  | 4.25  | 0.66  | 1 |    |
| 52 | 49 | 55.17 | 56 | 64 | 41 | 70 | 47.12 | 50.00 | 52.00 | 2.86  | 1.91  | 0.67  | 1 |    |
| 54 | 60 | 63.07 | 61 | 58 | 67 | 64 | 47.12 | 56.00 | 52.00 | 4.69  | 1.72  | 0.37  | 1 |    |
| 64 | 70 | 47.57 | 50 | 73 | 57 | 78 | 58.81 | 62.00 | 60.00 | 3.99  | 1.25  | 0.31  | 2 | 3  |
| 49 | 51 | 54.56 | 52 | 61 | 47 | 61 | 58.81 | 56.00 | 64.00 | 1.94  | 0.24  | 0.12  | 2 | 21 |
| 33 | 47 | 52.04 | 45 | 38 |    | 45 | 50.20 | 60.00 | 52.00 | 2.15  | 2.71  | 1.26  | 2 | 10 |
| 67 | 66 | 61.62 | 55 | 71 | 59 | 61 | 62.62 | 60.00 | 68.00 | 1.83  | 0.19  | 0.10  | 1 |    |
| 62 | 70 | 44.45 | 43 | 59 | 58 | 56 | 50.20 | 58.00 | 60.00 | 2.86  | 0.83  | 0.29  | 1 |    |
| 48 | 36 | 46.04 | 43 | 40 | 42 | 34 | 33.83 | 56.00 | 40.00 | 1.44  | 0.00  | 0.00  | 2 | 40 |
| 63 | 74 | 53.00 | 69 | 66 | 52 | 75 | 62.62 | 48.00 | 50.00 | 8.14  | 5.24  | 0.64  |   |    |
| 52 | 60 | 47.17 | 52 | 61 | 53 | 50 | 41.56 | 56.00 | 54.00 | 2.84  | 0.93  | 0.33  | 1 |    |
| 35 | 23 | 42.98 | 35 | 29 | 25 | 34 | 29.20 | 54.00 | 54.00 | 6.00  | 1.54  | 0.26  | 1 |    |
| 33 | 43 | 49.15 | 44 | 37 | 30 | 45 | 29.20 | 40.00 | 40.00 | 2.23  | 2.04  | 0.91  | 1 |    |
| 73 | 34 | 54.97 | 49 | 60 | 59 | 53 | 41.56 | 66.00 | 68.00 | 2.87  | 1.53  | 0.53  | 1 |    |
| 40 | 36 | 40.71 | 50 | 37 | 53 | 50 | 36.83 | 58.00 | 54.00 | 4.22  | 0.92  | 0.22  | 1 |    |
| 57 | 66 | 72.98 | 58 | 70 | 69 | 64 | 62.62 | 58.00 | 48.00 | 3.59  | 2.05  | 0.57  | 1 |    |
| 61 | 51 | 40.64 | 61 | 59 | 55 | 56 | 44.24 | 56.00 | 48.00 | 5.02  | 2.22  | 0.44  | 1 |    |
| 52 | 28 | 57.57 | 55 | 51 | 47 | 53 | 55.21 | 50.00 | 78.00 | 2.37  | 0.00  | 0.00  |   |    |
| 41 | 32 | 48.61 | 47 | 48 | 60 | 45 | 35.78 | 60.00 | 44.00 | 6.15  | 0.00  | 0.00  | 1 |    |
| 63 | 58 | 63.12 | 59 | 63 | 53 | 50 | 62.62 | 52.00 | 50.00 | 4.05  | 3.04  | 0.75  | 1 |    |
| 57 | 43 | 55.81 | 59 | 66 | 47 | 67 | 55.21 | 60.00 | 62.00 | 4.18  | 1.00  | 0.24  | 2 | 2  |
| 53 | 28 | 43.72 | 39 |    | 47 | 31 | 31.28 | 60.00 | 52.00 | 4.01  | 1.06  | 0.27  | 1 |    |
| 38 | 45 | 50.93 | 46 | 44 | 56 | 50 | 44.24 | 46.00 | 44.00 | 2.38  | 1.56  | 0.66  | 1 |    |
| 54 | 68 | 61.12 | 64 | 64 | 47 | 53 | 62.62 | 50.00 | 48.00 | 7.17  | 5.27  | 0.74  | 1 |    |
| 69 | 45 | 45.72 | 48 | 50 | 41 | 42 | 45.65 | 48.00 | 48.00 | 2.22  | 0.84  | 0.38  | 1 |    |
| 43 | 40 | 51.25 | 42 | 51 | 40 | 50 | 29.84 | 60.00 | 40.00 | 2.74  | 0.00  | 0.00  | 1 |    |
| 65 | 66 | 57.60 | 67 | 74 | 74 | 61 | 58.81 | 58.00 | 64.00 | 0.99  | -0.64 | -0.65 | 2 | 30 |
| 56 | 41 | 39.83 | 44 | 52 | 60 | 56 | 47.12 | 64.00 | 62.00 | 0.99  | 0.89  | 0.90  | 2 | 2  |
| 56 | 62 | 61.94 | 43 | 52 | 47 | 42 | 32.08 | 62.00 | 64.00 | 2.64  | 2.00  | 0.76  | 1 |    |
| 46 | 45 | 39.02 | 62 | 55 | 44 | 59 | 62.62 | 56.00 | 52.00 | 3.37  | 1.32  | 0.39  |   |    |
| 36 | 62 | 44.44 | 57 | 45 | 45 | 39 | 44.24 | 46.00 | 80.00 | 6.87  | 0.00  | 0.00  | 1 |    |
| 35 | 43 | 38.70 | 55 | 46 | 48 | 59 | 36.83 | 48.00 | 66.00 | 2.70  | 0.00  | 0.00  | 1 |    |
| 49 | 85 | 47.23 | 53 | 59 | 46 | 48 | 41.56 | 50.00 | 72.00 | 1.44  | 0.00  | 0.00  | 2 | 30 |
| 48 | 64 | 46.94 | 47 | 49 | 45 | 42 | 44.24 | 46.00 | 46.00 | 2.74  | 1.46  | 0.53  | 1 |    |
| 40 | 51 | 43.52 | 45 | 41 | 68 | 48 | 45.65 | 48.00 | 48.00 | 8.31  | 7.10  | 0.85  | 1 |    |
| 37 | 41 | 47.34 | 50 | 36 | 31 | 37 | 41.56 | 50.00 | 44.00 | 6.51  | 3.34  | 0.51  | 1 |    |
| 37 | 49 | 59.42 | 47 | 40 | 55 | 42 | 36.83 | 58.00 | 58.00 | 2.70  | 2.05  | 0.76  | 1 |    |
| 48 | 38 | 36.47 | 38 | 37 | 62 | 25 | 28.07 | 84.00 | 84.00 | 8.72  | -0.14 | -0.02 | 1 |    |
| 48 | 51 | 55.11 | 50 | 50 | 46 | 61 | 62.62 | 56.00 | 58.00 | 11.03 | 3.18  | 0.29  | 1 |    |
| 68 | 57 | 45.56 | 63 | 67 | 66 | 50 | 66.63 | 56.00 | 46.00 | 4.18  | 3.49  | 0.83  | 1 |    |
| 40 | 36 | 39.43 | 36 | 32 | 50 | 28 | 36.83 | 50.00 | 48.00 | 2.82  | 1.54  | 0.55  | 2 | 30 |
| 47 | 53 | 61.84 | 42 | 49 | 51 | 45 | 58.81 | 54.00 | 50.00 | 3.86  | 1.43  | 0.37  |   |    |
| 56 | 38 | 52.04 | 45 | 47 | 57 | 42 | 39.10 | 52.00 | 42.00 | 4.74  | 0.75  | 0.16  | 1 |    |

|    |    |       |    |    |    |    |       |       |       |       |       |       |   |    |
|----|----|-------|----|----|----|----|-------|-------|-------|-------|-------|-------|---|----|
| 44 | 34 | 54.03 | 51 | 45 | 51 | 45 | 32.93 | 54.00 | 52.00 | 4.36  | -0.22 | -0.05 | 1 |    |
| 38 | 58 | 49.94 | 48 | 49 | 56 | 53 | 58.81 | 56.00 | 56.00 | 10.34 | 4.26  | 0.41  | 1 |    |
| 56 | 51 | 54.20 | 53 | 58 | 37 | 50 | 55.21 | 62.00 | 46.00 | 2.65  | 0.00  | 0.00  | 1 |    |
| 52 | 55 | 64.71 | 59 | 55 | 57 | 53 | 47.12 | 38.00 | 34.00 | 1.08  | 2.74  | 2.00  | 1 |    |
| 54 | 40 | 53.55 | 50 | 54 | 27 | 45 | 39.10 | 58.00 | 54.00 | 3.69  | 0.47  | 0.13  | 1 |    |
| 56 | 55 | 44.06 | 45 | 56 | 36 | 45 | 32.08 | 50.00 | 54.00 | 3.89  | 1.50  | 0.39  | 2 | 20 |
| 51 | 47 | 31.40 | 43 | 37 | 52 | 50 | 58.81 | 52.00 | 60.00 | 3.32  | 2.53  | 0.76  | 1 |    |
| 59 | 55 | 44.21 | 73 | 67 | 65 | 59 | 62.62 | 50.00 | 50.00 | 2.82  | 1.42  | 0.50  | 1 |    |
| 63 | 66 | 51.39 | 59 | 67 | 57 | 84 | 66.63 | 48.00 | 48.00 | 2.40  | 3.15  | 1.31  |   |    |
| 57 | 55 | 43.39 | 61 | 66 | 67 | 84 | 53.49 | 52.00 | 80.00 | 2.05  | 0.00  | 0.00  | 2 | 10 |
| 51 | 49 | 57.92 | 48 | 60 | 67 | 53 | 41.56 | 54.00 | 50.00 | 4.96  | 0.95  | 0.19  | 2 |    |
| 51 | 49 | 43.43 | 47 | 53 | 51 | 50 | 41.56 | 48.00 | 44.00 | 4.79  | 2.10  | 0.44  | 2 | 5  |
| 64 | 49 | 53.11 | 59 | 62 | 52 | 53 | 58.81 | 56.00 | 58.00 | 2.72  | 1.25  | 0.46  | 1 |    |
| 47 | 36 | 36.68 | 53 | 54 | 48 | 42 | 58.81 | 44.00 | 40.00 | 6.31  | 2.86  | 0.45  | 1 |    |
| 56 | 38 | 57.08 | 59 | 60 | 67 | 64 | 58.81 | 50.00 | 52.00 | 4.93  | 1.11  | 0.23  | 1 |    |
| 40 | 24 | 45.73 | 47 | 39 | 47 | 50 | 30.53 | 62.00 | 60.00 | 5.14  | 0.09  | 0.02  | 1 |    |
| 65 | 70 | 48.78 | 54 | 70 | 49 | 56 | 58.81 | 56.00 | 56.00 | 2.39  | 0.49  | 0.21  | 1 |    |
| 58 | 77 | 60.70 | 57 | 69 | 58 | 56 | 62.62 | 46.00 | 42.00 | 2.40  | 1.12  | 0.47  | 1 |    |
| 61 | 49 | 57.96 | 63 | 74 | 62 | 75 | 58.81 | 62.00 | 64.00 | 2.16  | 0.12  | 0.06  | 2 | 5  |
| 46 | 47 | 36.64 | 44 | 42 |    |    |       | 72.00 | 48.00 | 5.86  | 1.37  | 0.23  | 1 |    |
| 51 | 58 | 42.29 | 63 | 58 |    |    |       | 66.00 | 44.00 | 6.59  | 5.97  | 0.90  | 1 |    |
| 70 | 60 | 60.10 | 51 | 69 |    |    |       | 50.00 | 50.00 | 2.33  | 3.15  | 1.35  | 1 |    |
| 59 | 62 | 41.89 | 59 | 63 | 60 | 64 | 47.12 | 68.00 | 84.00 | 3.08  | 1.52  | 0.49  | 1 |    |
| 56 | 47 | 58.25 | 51 | 59 | 49 | 67 | 58.81 | 52.00 | 48.00 | 2.91  | 2.97  | 1.02  | 2 |    |
| 61 | 51 | 46.76 | 58 | 67 | 54 | 56 | 58.81 | 50.00 | 50.00 | 4.56  | 3.11  | 0.68  | 1 |    |
| 67 | 51 | 55.69 | 67 | 77 | 63 | 70 | 58.81 | 56.00 | 54.00 | 2.06  | -0.36 | -0.17 | 1 |    |
| 63 | 49 | 62.08 | 71 | 75 | 71 | 67 | 58.81 | 54.00 | 46.00 | 2.86  | 1.96  | 0.68  | 1 |    |
| 53 | 47 | 48.95 | 47 | 53 |    |    |       | 52.00 | 78.00 | 0.86  | 0.01  | 0.01  | 2 | 30 |
| 72 | 77 | 55.92 | 73 | 84 | 62 | 67 | 62.62 | 54.00 | 52.00 | 2.29  | 2.12  | 0.93  | 1 |    |
| 63 | 66 | 43.20 | 60 | 69 | 57 | 59 | 62.62 | 52.00 | 58.00 | 1.51  | -0.22 | -0.14 | 1 |    |
| 70 | 75 | 64.88 | 60 | 80 | 62 | 84 | 66.63 | 52.00 | 50.00 | 3.51  | 0.69  | 0.20  | 1 |    |
| 59 | 72 | 48.42 | 62 | 73 | 50 | 67 | 58.81 | 70.00 | 84.00 | 1.01  | 0.92  | 0.91  | 1 |    |
| 54 | 58 | 61.34 | 57 | 63 |    |    |       | 62.00 | 68.00 | 2.77  | 0.58  | 0.21  | 2 | 22 |
| 63 | 64 | 64.38 | 56 | 73 | 45 | 61 | 62.62 | 48.00 | 50.00 | 1.77  | 2.66  | 1.50  | 2 | 33 |
| 64 | 55 | 54.23 | 68 | 73 | 49 | 64 | 62.62 | 66.00 | 64.00 | 2.09  | 1.74  | 0.83  | 1 |    |
| 54 | 43 | 48.44 | 54 | 63 | 66 | 61 | 53.49 | 46.00 | 64.00 | 3.51  | 0.35  | 0.10  | 1 |    |
| 47 | 49 | 61.49 | 61 | 74 | 68 | 64 | 66.63 | 50.00 | 68.00 | 3.65  | -1.20 | -0.33 | 1 |    |
| 70 | 64 | 52.35 | 66 | 76 | 63 | 72 | 62.62 | 58.00 | 58.00 | 5.84  | 2.14  | 0.37  | 1 |    |
| 46 | 62 | 37.96 | 55 | 58 | 67 | 50 | 53.49 | 62.00 | 64.00 | 4.21  | 4.52  | 1.07  | 2 | 33 |
| 59 | 49 | 32.60 | 56 | 57 | 57 | 56 | 55.21 | 50.00 | 52.00 | 5.07  | 3.04  | 0.60  | 1 |    |
| 65 | 70 | 51.83 | 66 | 78 | 57 | 81 | 58.81 | 60.00 | 56.00 | 1.43  | 1.29  | 0.90  | 2 | 14 |
| 51 | 77 | 55.00 | 64 | 67 | 43 | 67 | 62.62 | 52.00 | 44.00 | 2.17  | 2.15  | 0.99  | 2 | 35 |
| 63 | 49 | 53.57 | 54 | 64 | 35 | 64 | 58.81 | 66.00 | 62.00 | 2.86  | 1.97  | 0.69  |   |    |
| 61 | 49 | 50.80 | 55 | 63 | 59 | 45 | 58.81 | 64.00 | 56.00 | 2.91  | 3.45  | 1.19  | 1 |    |
| 61 | 60 | 63.84 | 63 | 72 | 53 | 59 | 62.62 | 60.00 | 62.00 | 2.53  | 0.52  | 0.21  | 2 | 20 |
| 57 | 53 | 50.19 | 52 | 62 | 41 | 59 | 55.21 | 58.00 | 64.00 | 4.20  | 0.77  | 0.18  | 2 | 31 |
| 68 | 87 | 52.92 | 69 | 80 | 57 | 59 | 62.62 | 52.00 | 76.00 | 2.60  | 0.60  | 0.23  | 2 | 20 |
| 49 | 43 | 49.19 | 57 | 60 | 45 | 53 | 66.63 | 60.00 | 56.00 | 3.76  | 0.27  | 0.07  | 2 | 38 |
| 58 | 98 | 46.20 | 58 | 72 | 48 | 48 | 58.81 | 54.00 | 52.00 | 3.08  | 0.98  | 0.32  | 2 |    |
| 65 | 57 | 54.08 | 66 | 70 | 56 | 72 | 62.62 | 56.00 | 56.00 | 3.49  | 0.96  | 0.28  |   |    |
| 54 | 81 | 63.91 | 59 | 69 | 59 | 56 | 62.62 | 50.00 | 52.00 | 2.62  | 0.59  | 0.23  | 1 |    |
| 64 | 58 | 68.59 | 55 | 75 | 45 | 50 | 58.81 | 66.00 | 58.00 | 3.27  | 2.20  | 0.67  | 1 |    |
| 58 | 55 | 52.02 | 56 | 71 | 67 | 67 | 66.63 | 52.00 | 54.00 | 3.38  | 1.42  | 0.42  | 1 |    |
| 58 | 51 | 61.99 | 68 | 71 | 57 | 61 | 66.63 | 54.00 | 52.00 | 1.65  | -0.29 | -0.17 |   |    |
| 61 | 68 | 49.23 | 58 | 67 | 57 | 70 | 66.63 | 50.00 | 48.00 | 1.63  | 0.98  | 0.60  | 1 |    |
| 67 | 60 | 52.25 | 70 | 78 | 73 | 89 | 50.20 | 62.00 | 60.00 | 0.83  | 0.06  | 0.07  | 1 |    |
| 59 | 58 | 63.68 | 53 | 70 | 43 | 61 | 62.62 | 50.00 | 78.00 | 4.17  | 0.08  | 0.02  | 1 |    |
| 73 | 70 | 65.80 | 67 | 82 | 64 | 70 | 62.62 | 52.00 | 44.00 | 1.80  | 0.61  | 0.34  | 1 |    |
| 62 | 43 | 45.83 | 48 | 55 | 56 | 48 | 47.12 | 48.00 | 44.00 | 2.37  | 2.37  | 1.00  | 1 |    |
| 69 | 62 | 51.97 | 59 | 71 | 67 | 70 | 62.62 | 54.00 | 54.00 | 3.71  | 1.09  | 0.29  |   |    |
| 64 | 53 | 41.03 | 66 | 65 | 57 | 50 | 47.12 | 56.00 | 54.00 | 2.17  | 0.34  | 0.16  | 1 |    |
| 69 | 45 | 58.01 | 66 | 77 | 65 | 72 | 55.21 | 58.00 | 52.00 | 2.53  | 1.90  | 0.75  | 2 |    |



|    |    |       |    |    |    |    |       |       |       |      |       |       |   |    |
|----|----|-------|----|----|----|----|-------|-------|-------|------|-------|-------|---|----|
| 54 | 62 | 63.69 | 57 | 64 | 54 | 84 | 58.81 | 68.00 | 60.00 | 2.38 | 0.99  | 0.42  | 2 |    |
| 61 | 55 | 69.81 | 65 | 73 | 52 | 84 | 62.62 | 64.00 | 56.00 | 3.06 | -0.08 | -0.02 | 1 |    |
| 64 | 81 | 48.60 | 69 | 79 | 79 | 84 | 62.62 | 52.00 | 54.00 | 6.37 | 1.86  | 0.29  | 1 |    |
| 54 | 64 | 59.51 | 52 | 66 | 44 | 64 | 58.81 | 54.00 | 62.00 | 4.96 | 2.00  | 0.40  | 1 |    |
| 62 | 64 | 55.47 | 60 | 71 | 60 | 56 | 66.63 | 64.00 | 46.00 | 4.97 | 0.87  | 0.17  | 2 | 25 |

smoking amount

20

2

7

10

15

5

5

10

20

3

35

20

20

20

5

20

9

15

20

20

6

7

10

10

40

40

10

15

10

10

15

20

4

2

10

20

16  
8

20

10  
10

1  
15  
20  
10
